# Supplementary material for: One-pot organocatalyzed synthesis of tricyclic indolizines
Source: Royal Society of Chemistry journal article supplement (doi:10.1039/d3ob00346a), 2023-01-01
Supplement: d3ob00346a1.pdf [file d3ob00346a1.pdf]

## One-pot Organocatalyzed Synthesis of Polycyclic Indolizines

Lucas A. Zeoly,<sup>a</sup> Lais V. Acconcia,<sup>a</sup> Manoel T Rodrigues Jr.,<sup>a</sup> Hugo Santos,<sup>a</sup> Rodrigo A. Cormanich,<sup>a</sup> Juan C. Paniagua,<sup>b,c</sup> Albert Moyano<sup>d\*</sup> and Fernando Coelho<sup>a\*</sup>

<sup>a</sup>Laboratório de Síntese de Produtos Naturais e Fármacos, Department of Organic Chemistry – Institute of Chemistry – University of Campinas – PO Box 6154 – 13083-970 – Campinas, SP – Brazil; <sup>b</sup>Departament de Ciència de Materials i Química Física, Universitat de Barcelona – Facultat de Química – C. Martí i Franquès 1-11 – 08028 - Barcelona, Catalonia, Spain; <sup>c</sup>Institut de Química Teòrica i Computacional, Universitat de Barcelona; <sup>d</sup>Departament de Química Inorgànica i Orgànica, Universitat de Barcelona – Facultat de Química – C. Martí i Franquès 1-11 – 08028 - Barcelona, Catalonia, Spain.

### SUPPORTING INFORMATION

- S2-S66 NMR (<sup>1</sup>H, <sup>13</sup>C, <sup>19</sup>F) spectra for compounds **4ab**, **4eb**, **4gb**, **4ja**, **5aa-5ic**, **6ag**, **6eb**, **7**, **8**, **10** and **11**.
- S67-S68 HPLC chromatograms of compounds *rac*-**11** and (*R*)-**11**.
- S69-S79 Computational Calculations

# **$^1\text{H}$ NMR and $^{13}\text{C}$ NMR spectra**

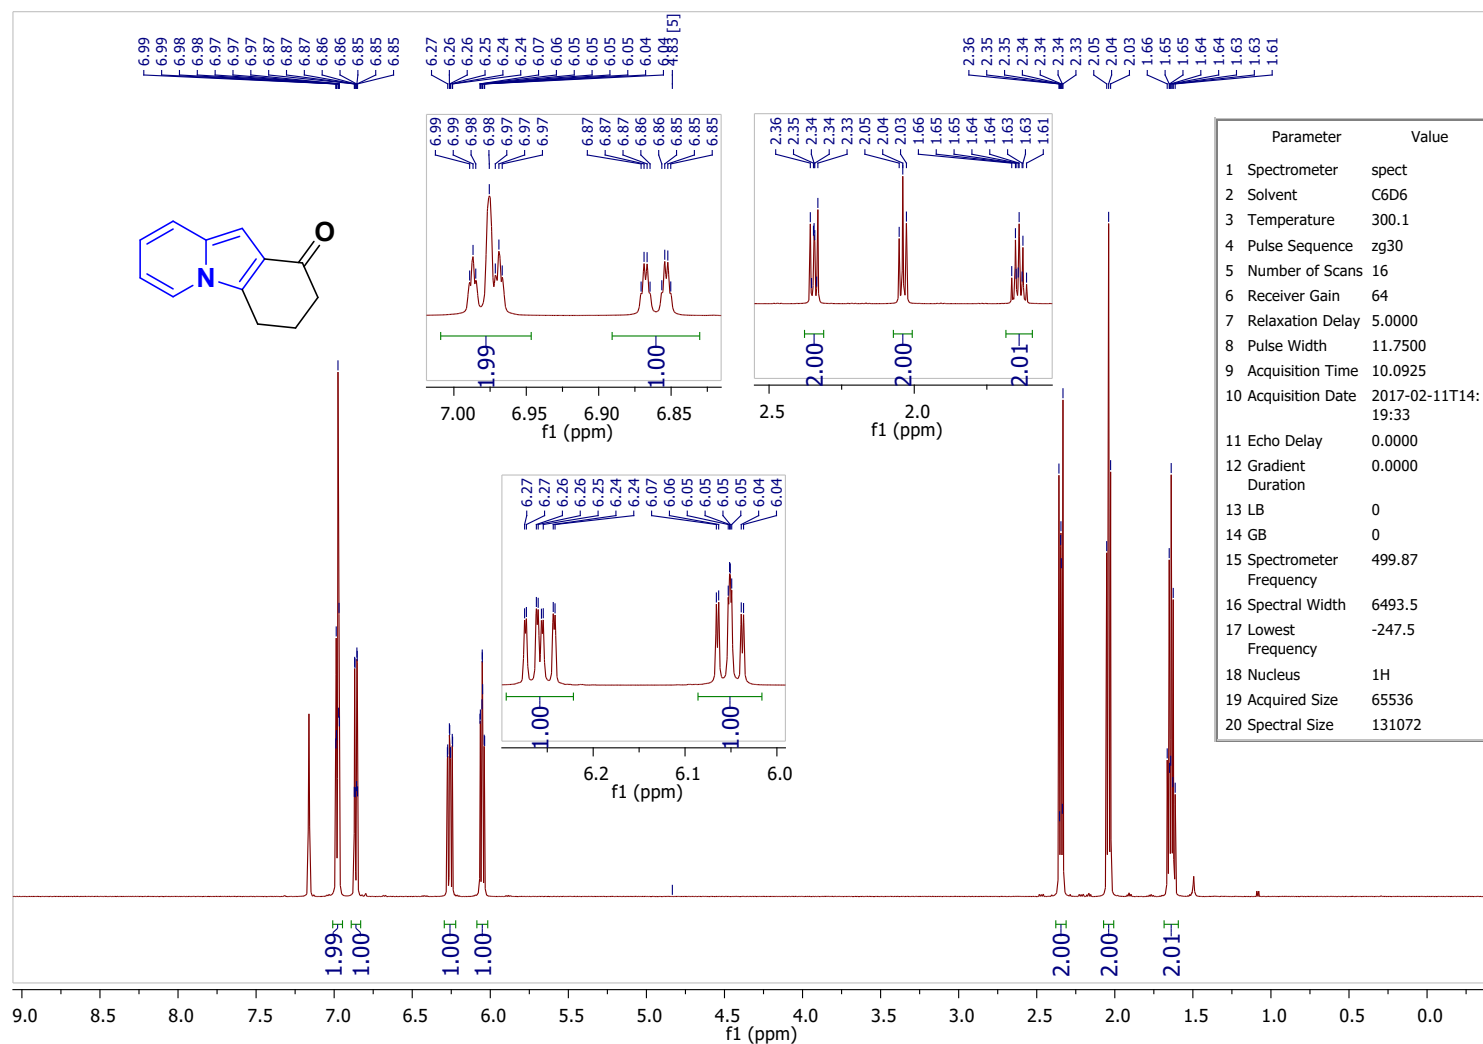

Figure S1. <sup>1</sup>H NMR spectrum (500 MHz, C<sub>6</sub>D<sub>6</sub>) of compound 5aa.

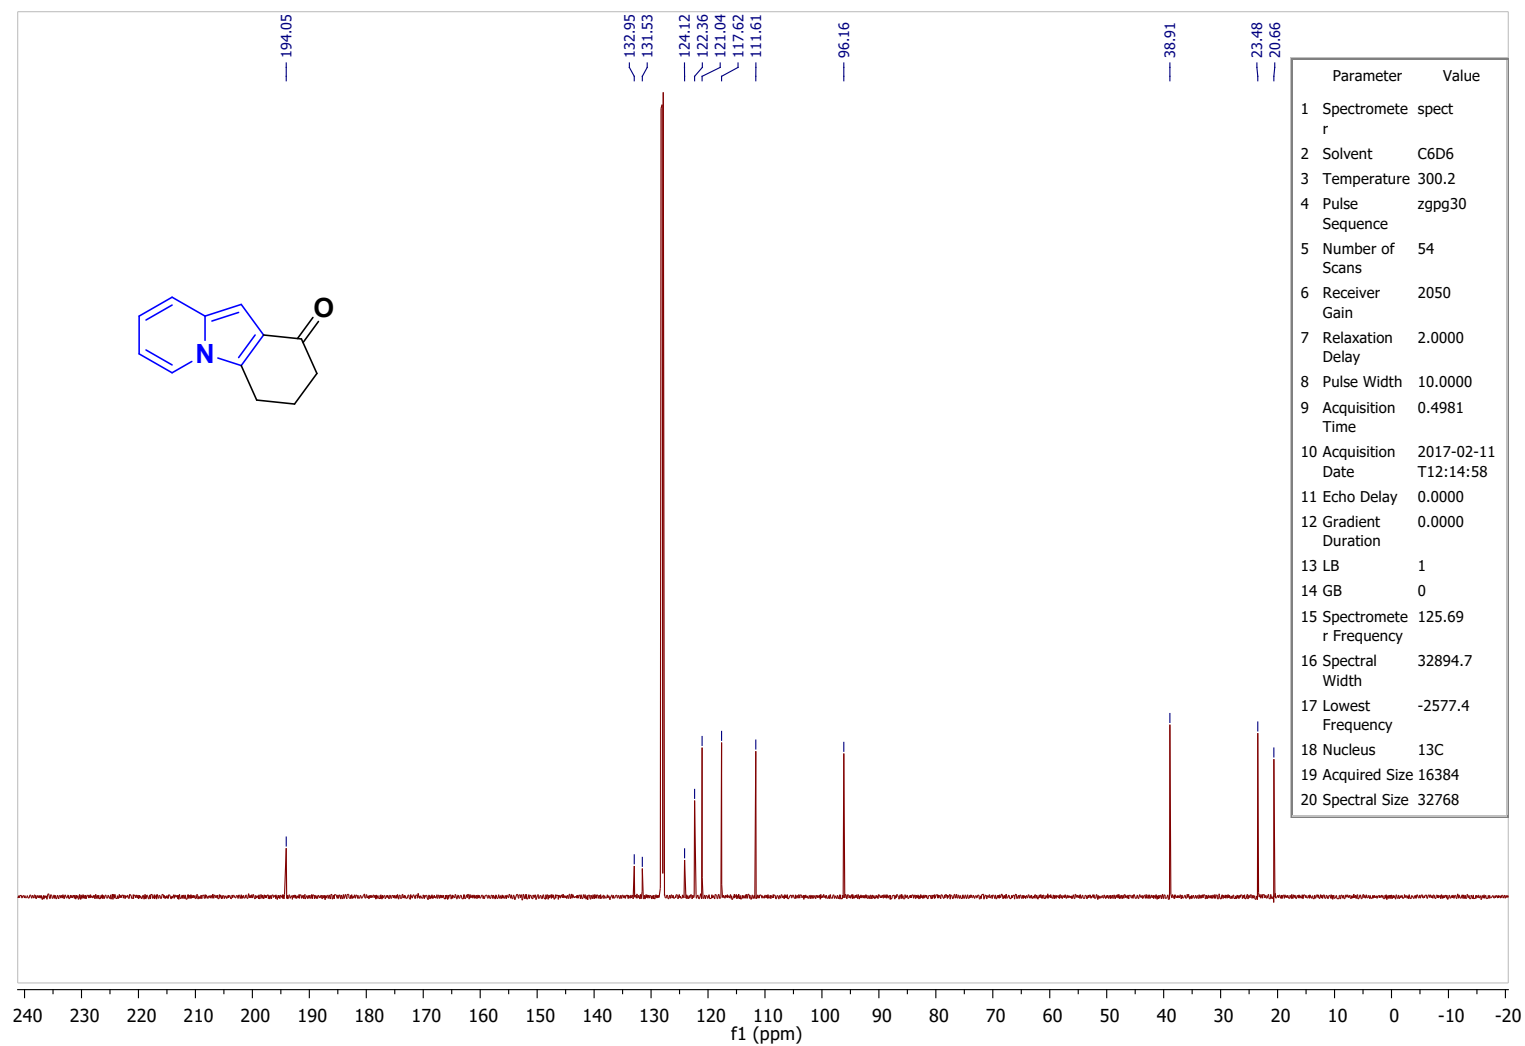

**Figure S2.**  $^{13}\text{C}$  NMR spectrum (126 MHz,  $\text{C}_6\text{D}_6$ ) of compound **5aa**.

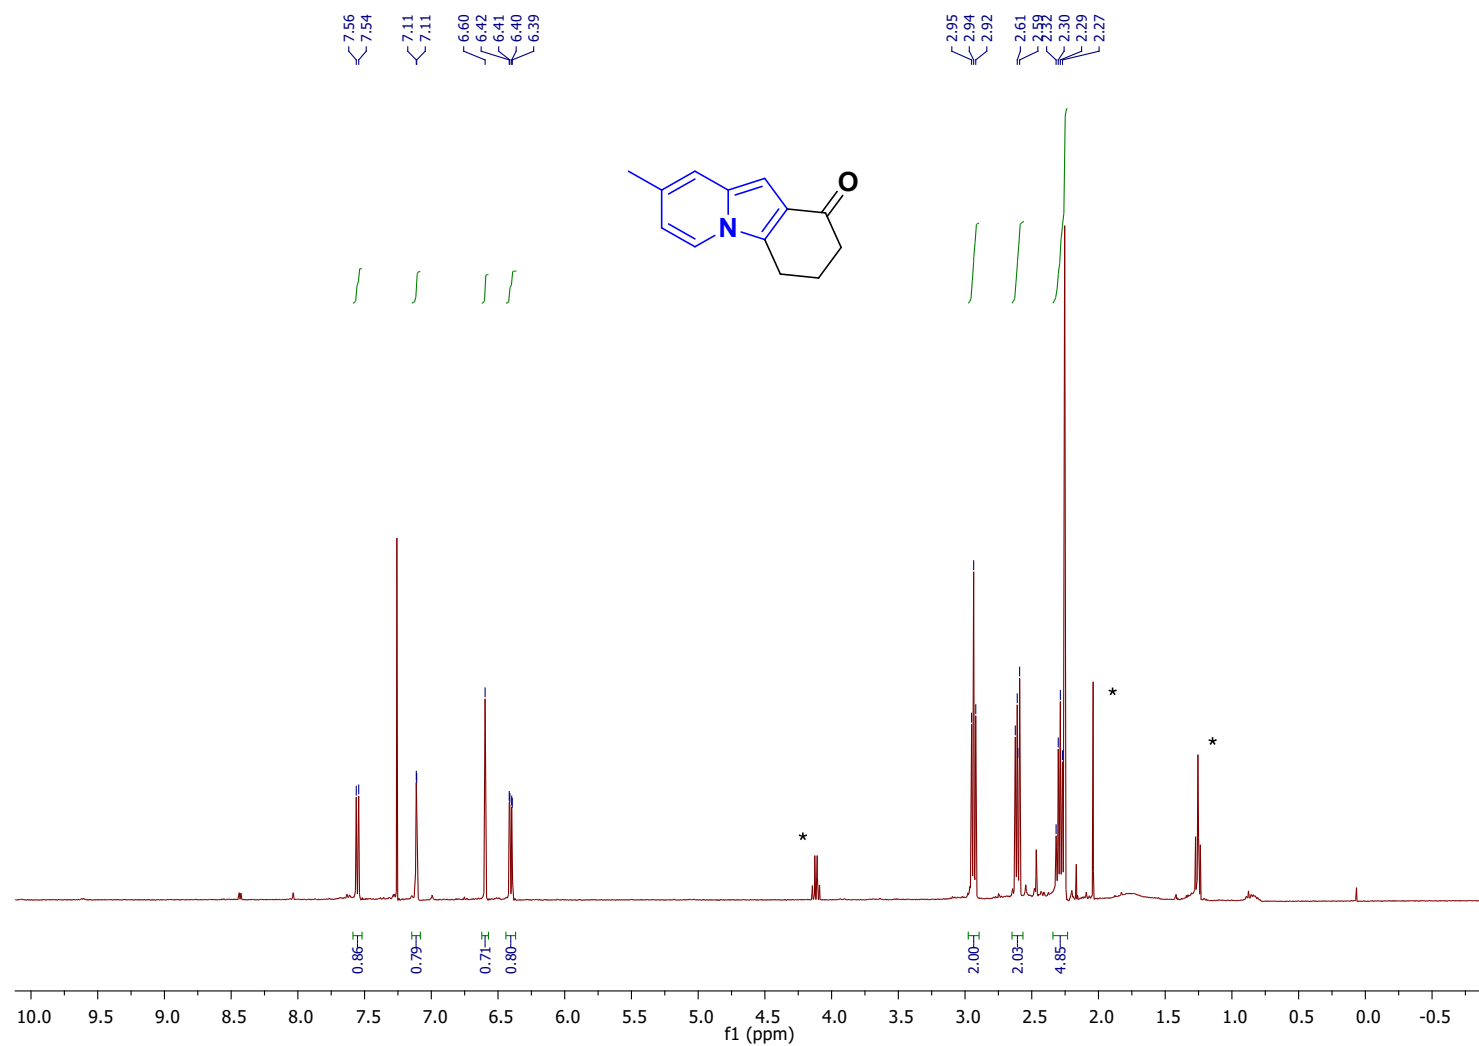

**Figure S3.** <sup>1</sup>H NMR spectrum (400 MHz, CDCl<sub>3</sub>) of compound **5ba** (\* = residual peaks from ethyl acetate).

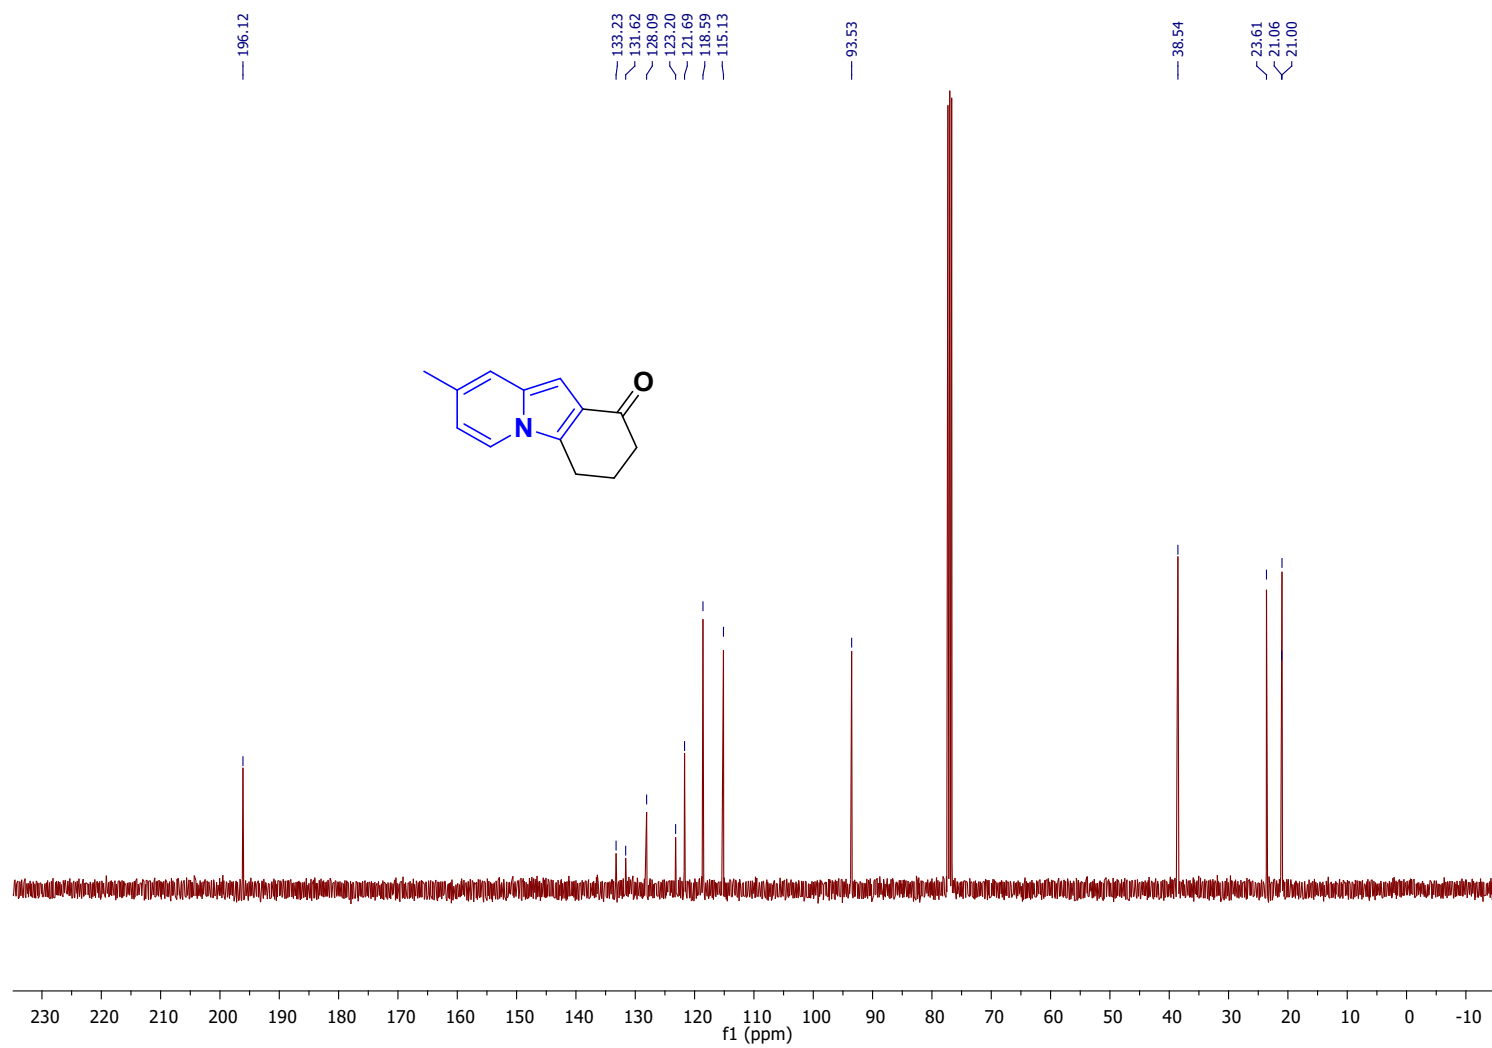

Figure S4.  $^{13}\text{C}$  NMR spectrum (101 MHz,  $\text{CDCl}_3$ ) of compound 5ba.

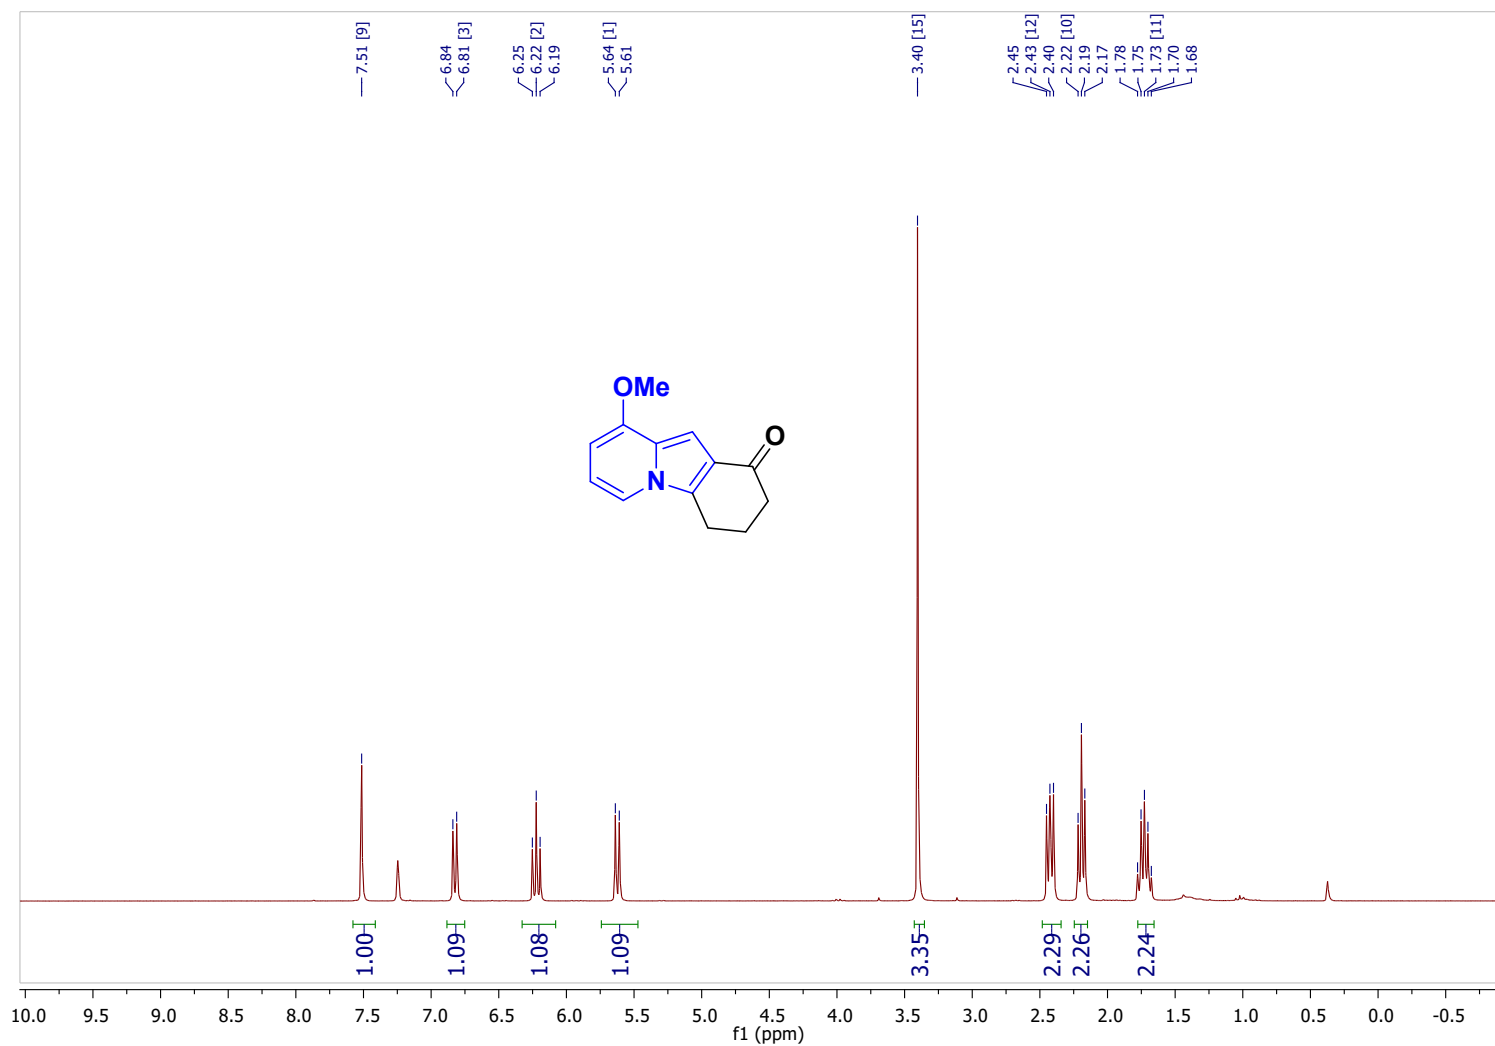

Figure S5.  $^1\text{H}$  NMR spectrum (250 MHz,  $\text{C}_6\text{D}_6$ ) of compound 5ca.

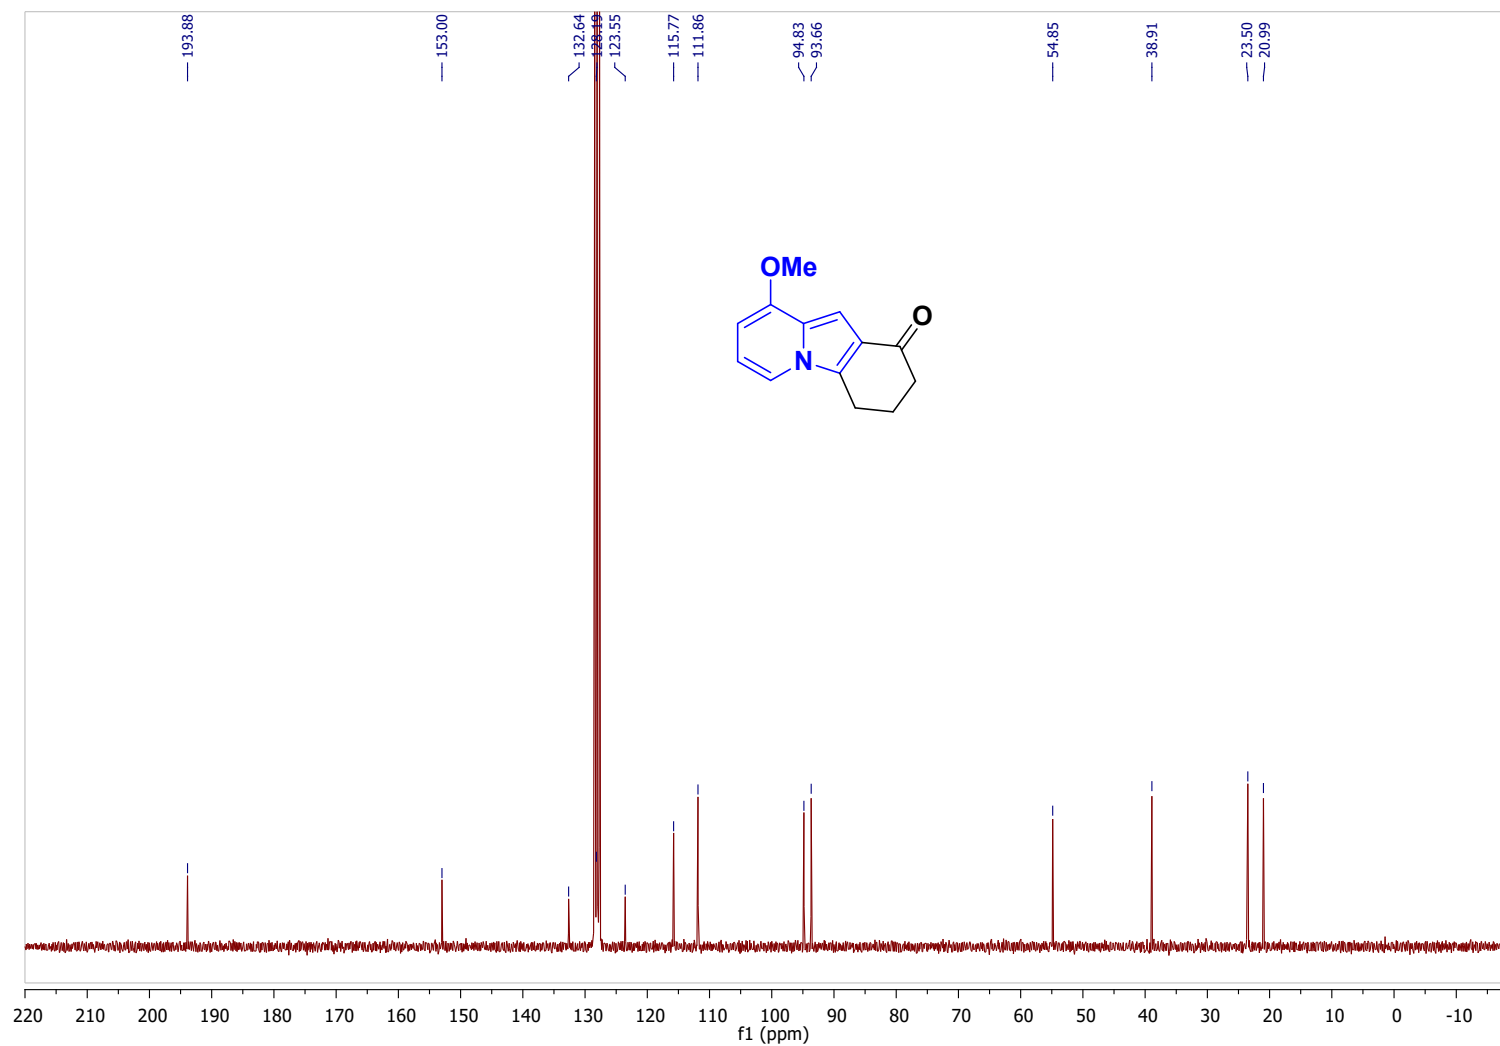

Figure S6.  $^{13}\text{C}$  NMR spectrum (62.5 MHz,  $\text{C}_6\text{D}_6$ ) of compound 5ca.



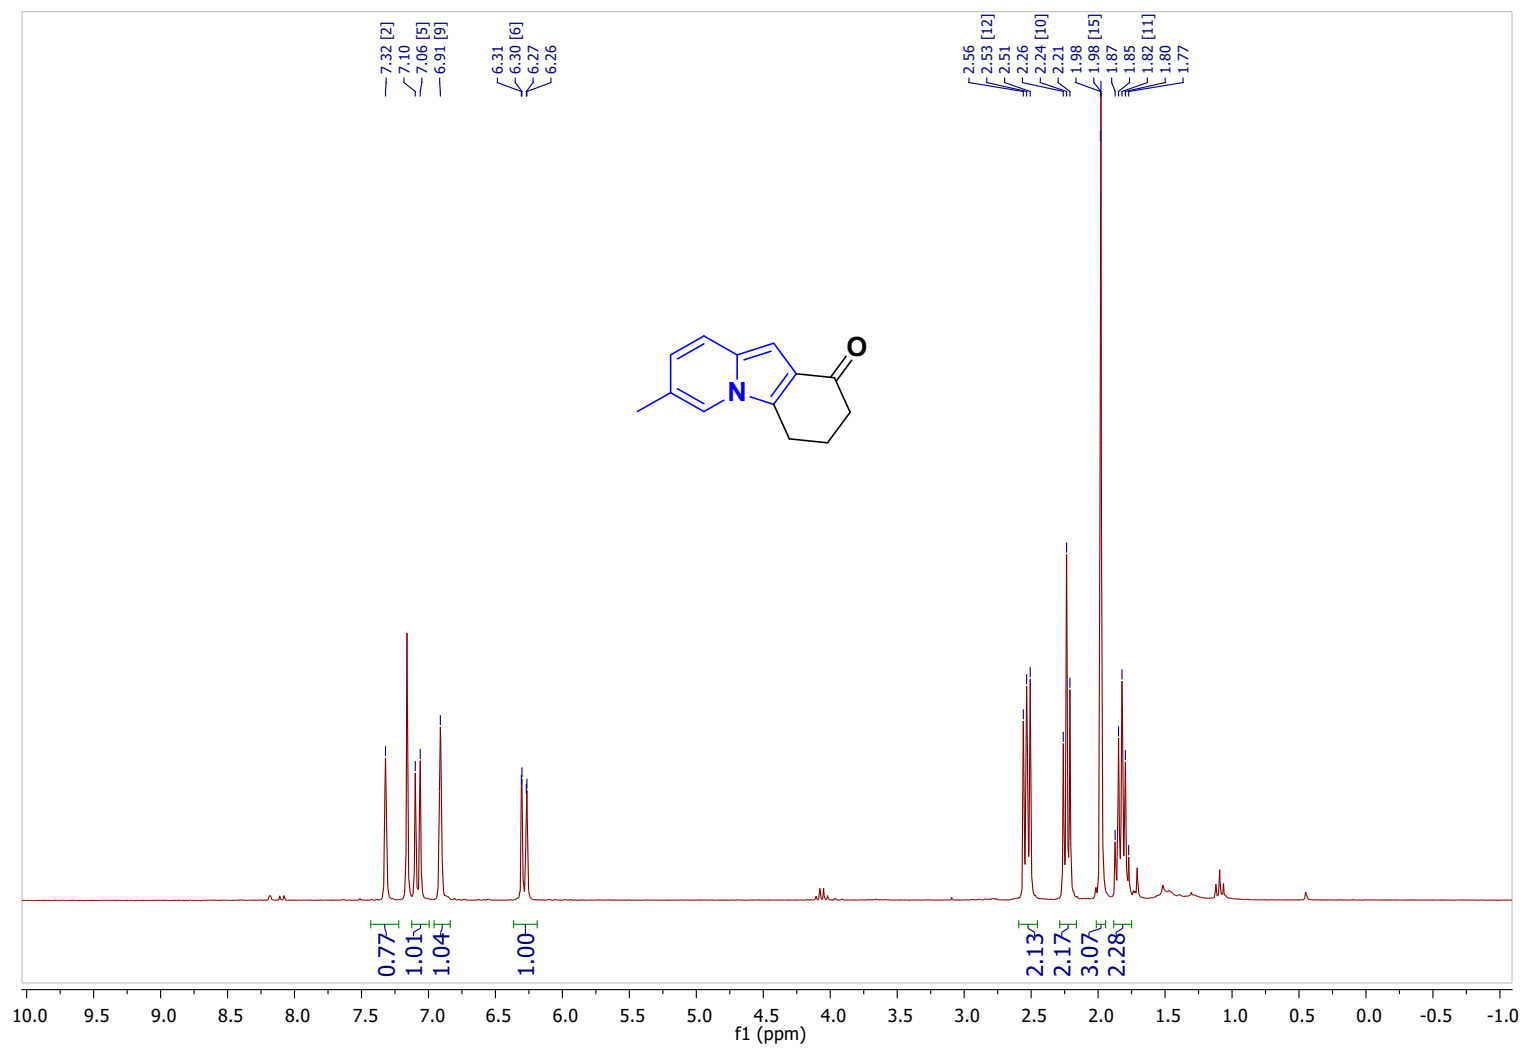

Figure S7. <sup>1</sup>H NMR spectrum (250 MHz, C<sub>6</sub>D<sub>6</sub>) of compound 5da.

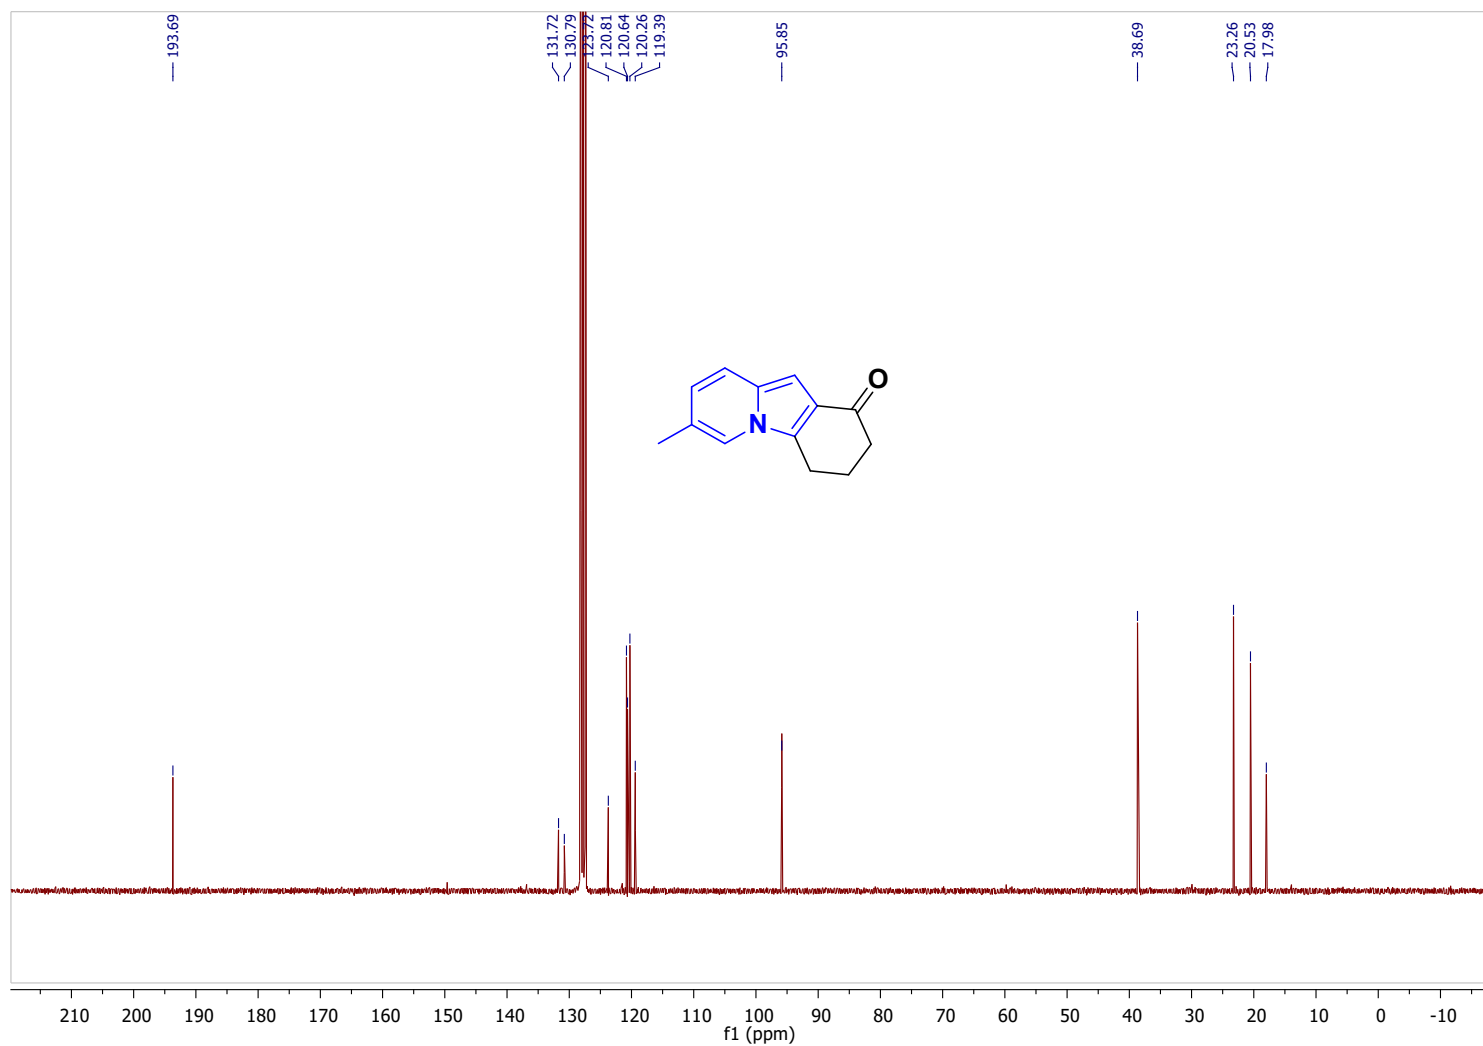

**Figure S8.**  $^{13}\text{C}$  NMR spectrum (62.5 MHz,  $\text{C}_6\text{D}_6$ ) of compound **5da**.

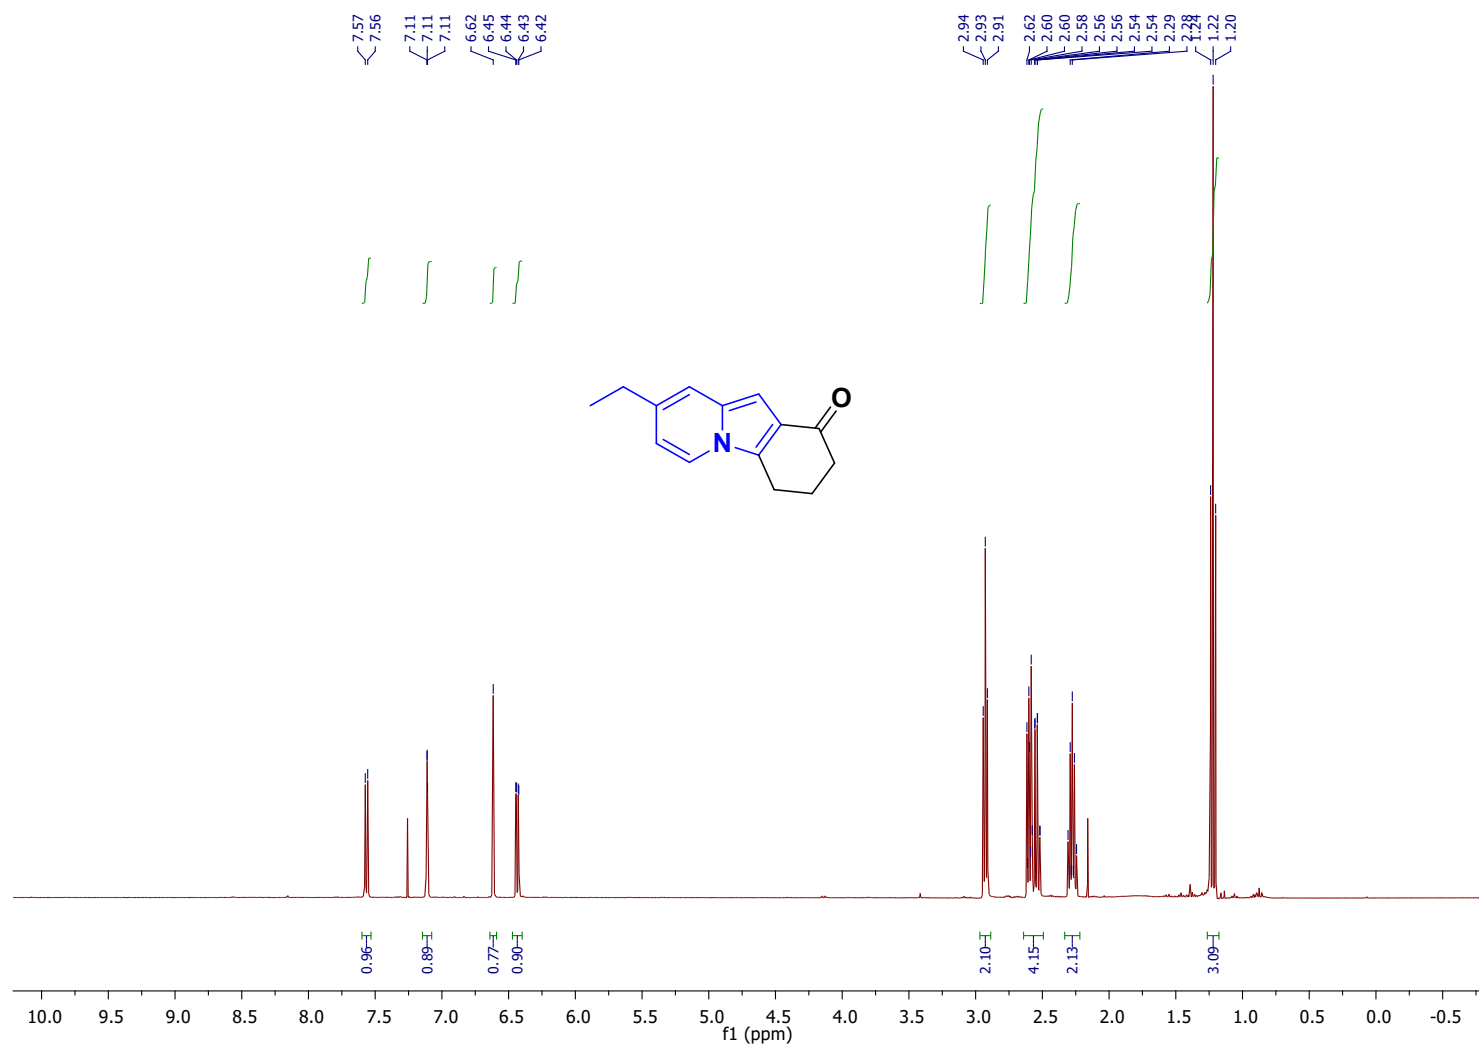

Figure S9.  $^1\text{H}$  NMR spectrum (400 MHz,  $\text{CDCl}_3$ ) of compound 5ea.

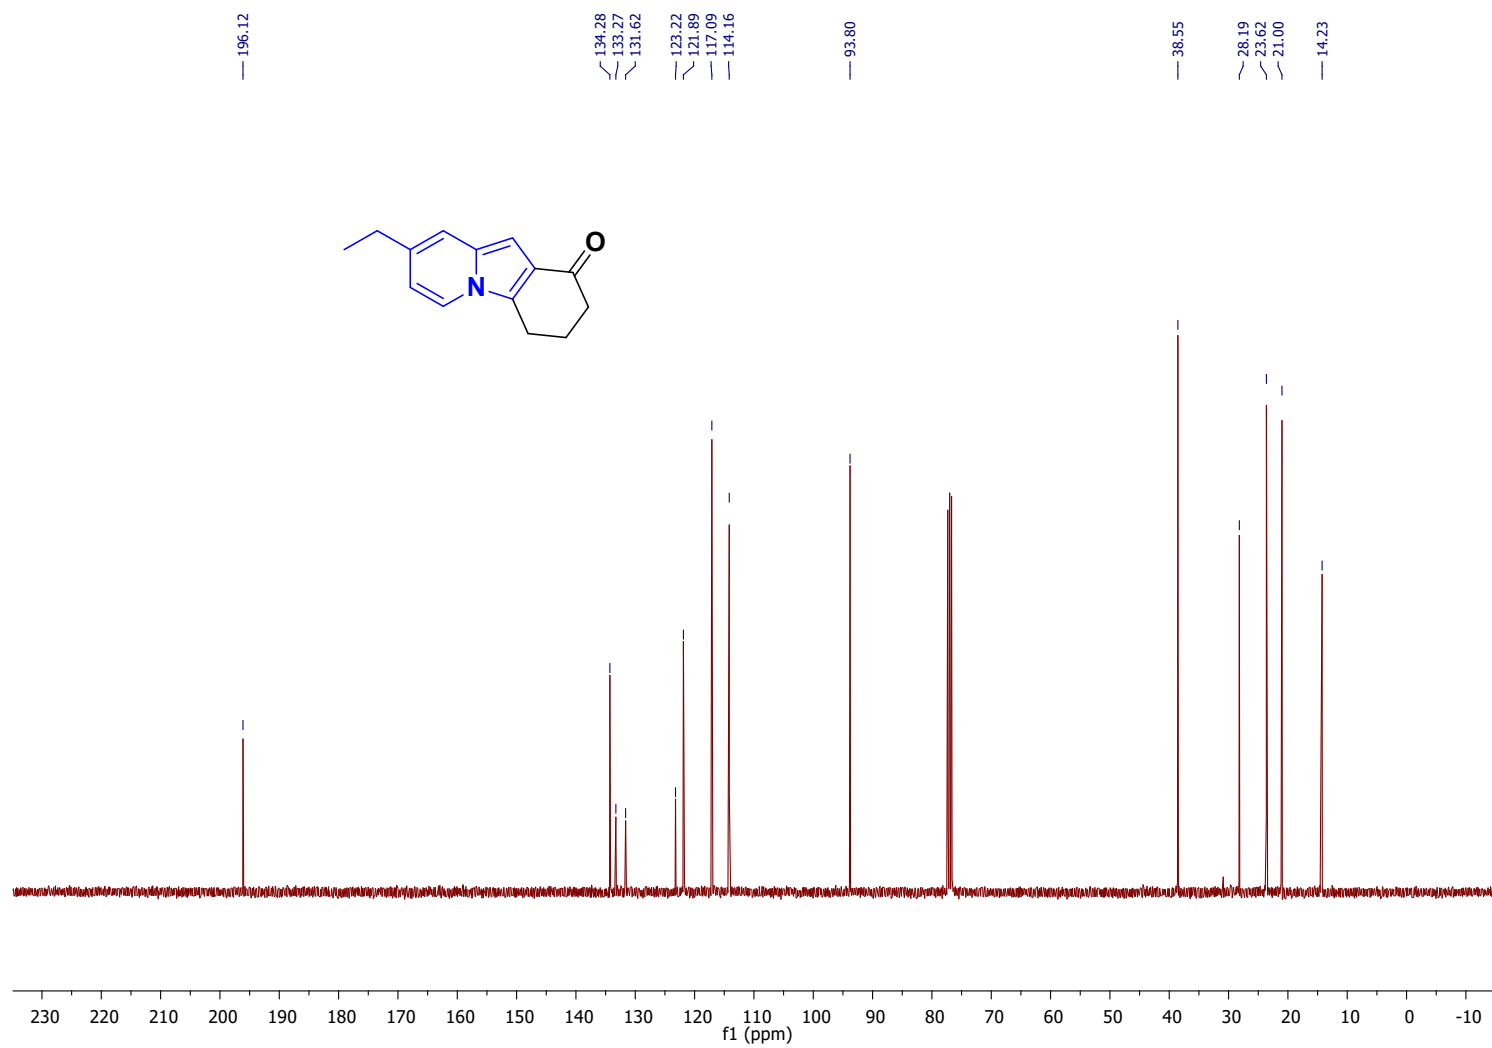

Figure S10.  $^{13}\text{C}$  NMR spectrum (101 MHz,  $\text{CDCl}_3$ ) of compound 5ea.

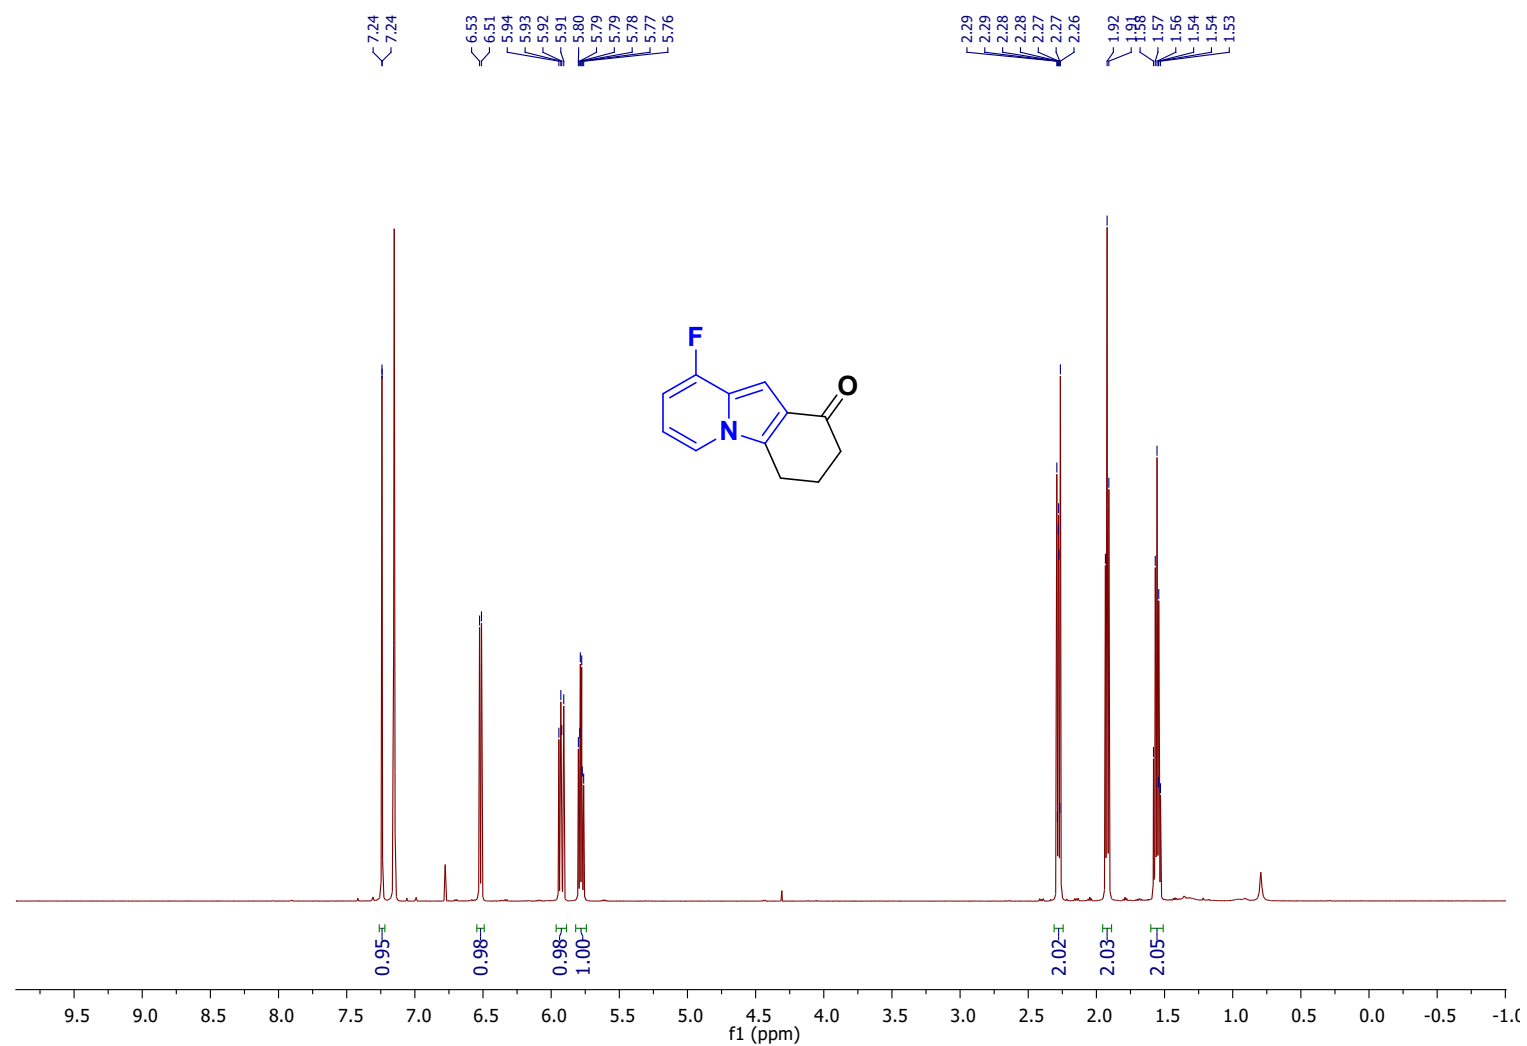

**Figure S11.** <sup>1</sup>H NMR spectrum (500 MHz, C<sub>6</sub>D<sub>6</sub>) of compound **5fa**.

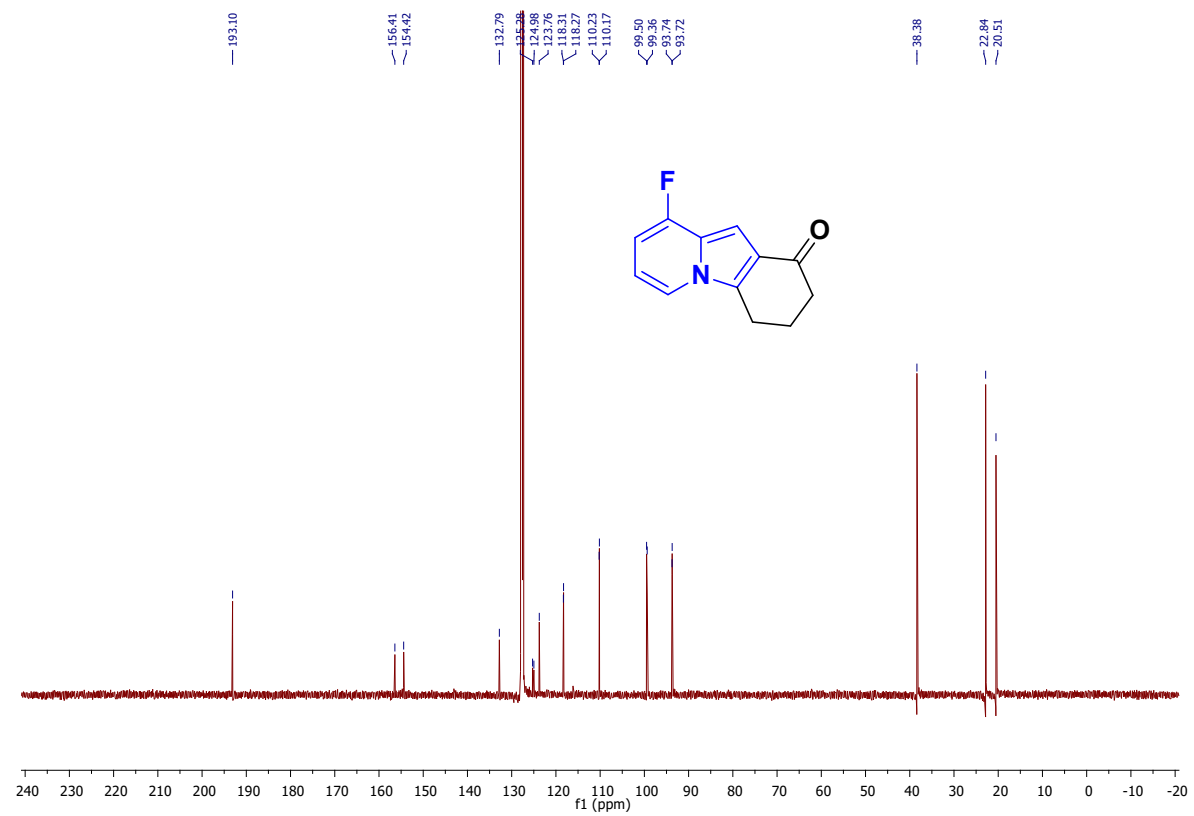

**Figure S12.**  $^{13}\text{C}$  NMR spectrum (126 MHz,  $\text{C}_6\text{D}_6$ ) of compound **5fa**.

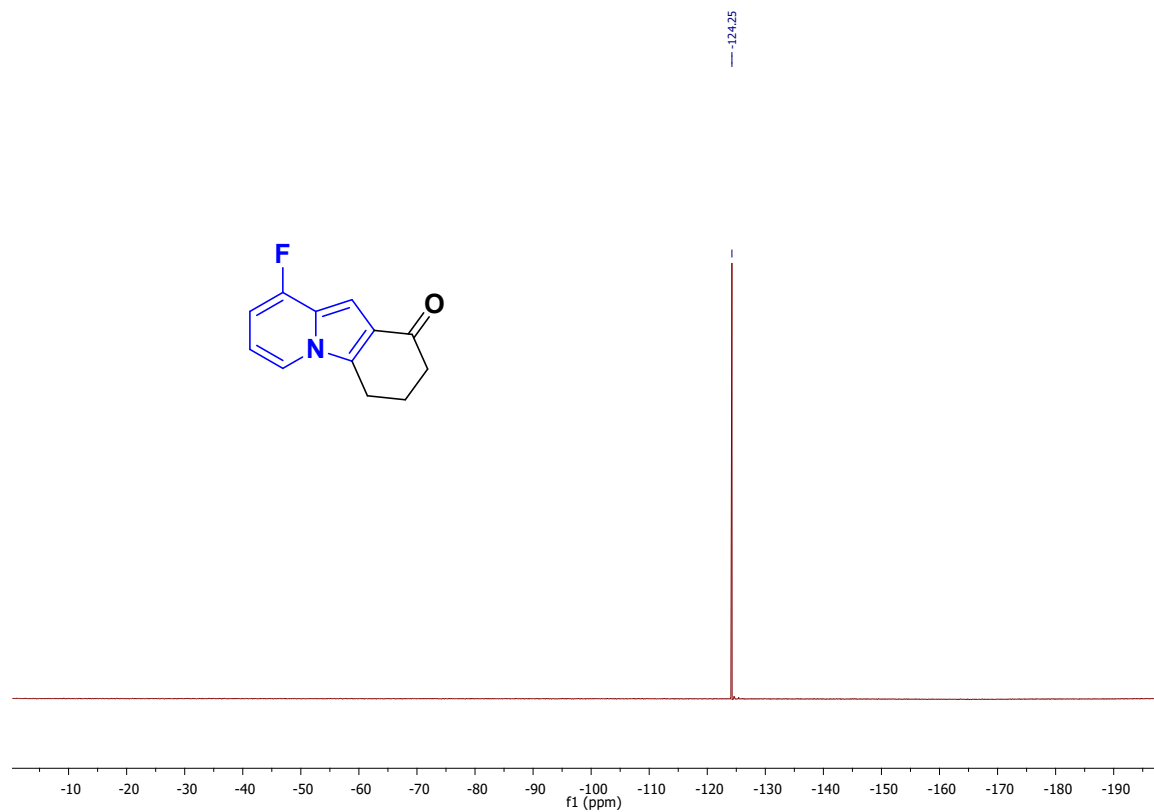

**Figure S13.**  $^{19}\text{F}$  NMR spectrum (470 MHz,  $\text{C}_6\text{D}_6$ ) of compound **5fa**.

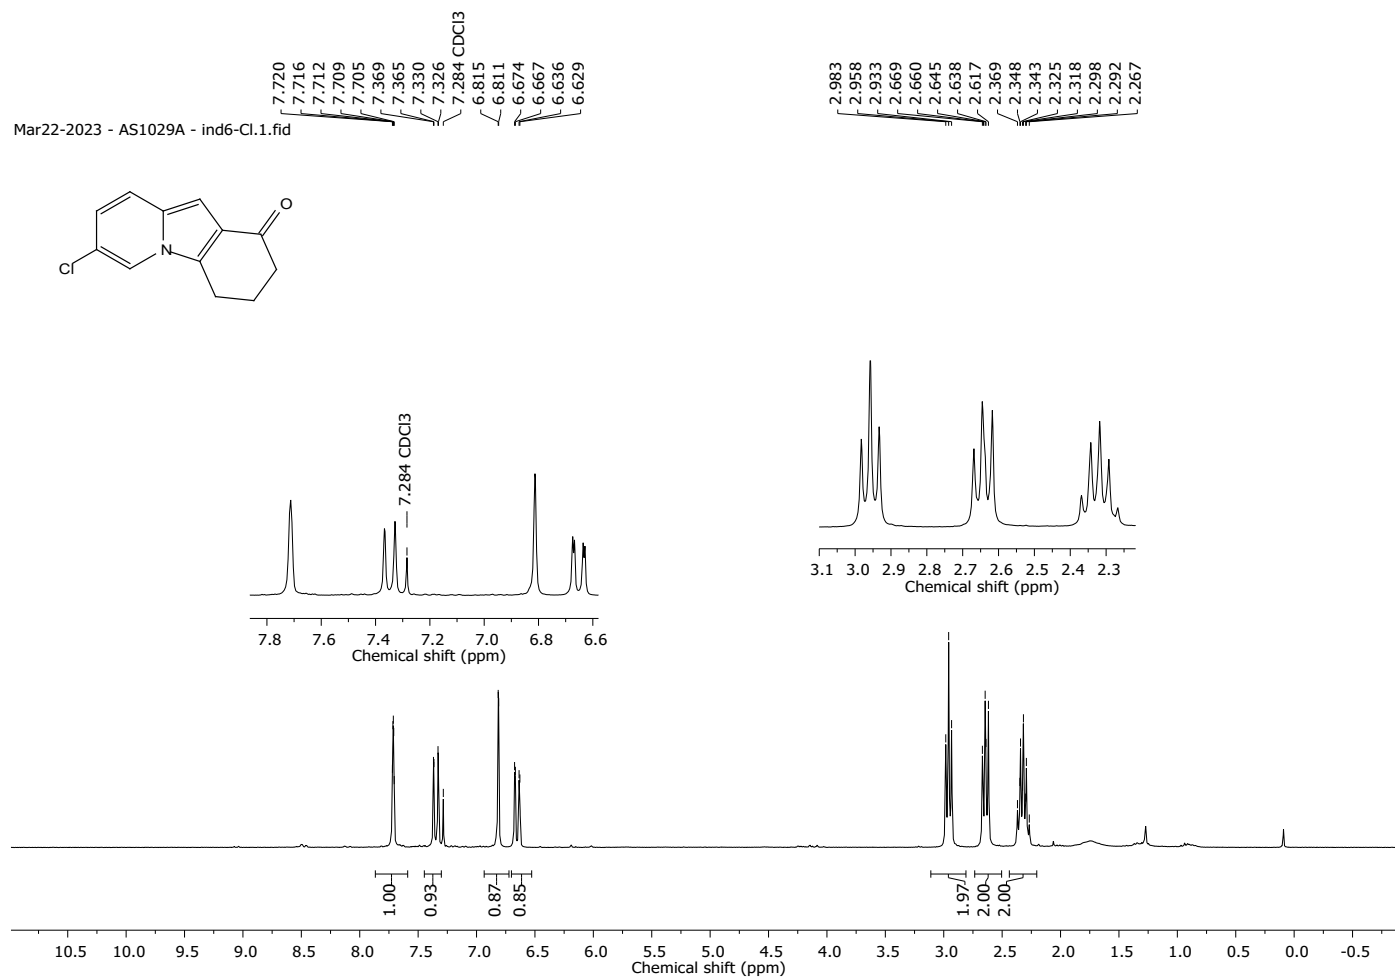

**Figure S14.** <sup>1</sup>H NMR spectrum (250 MHz, CDCl<sub>3</sub>) of compound **5ga**.



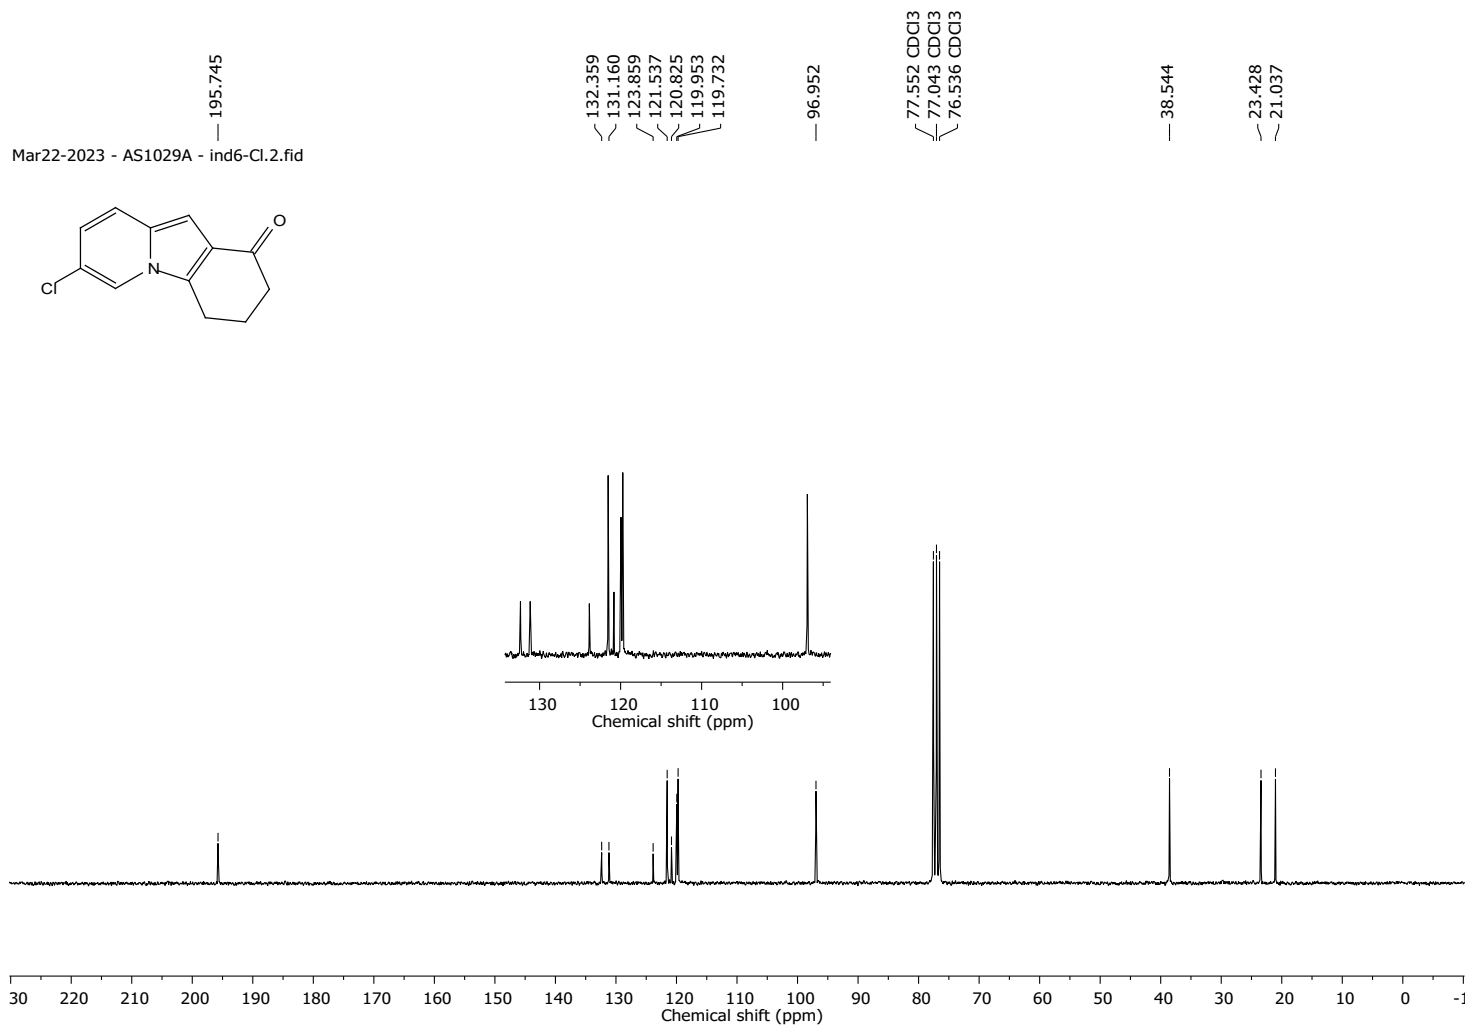

**Figure S15.** <sup>13</sup>C NMR spectrum (63 MHz, CDCl<sub>3</sub>) of compound **5ga**.

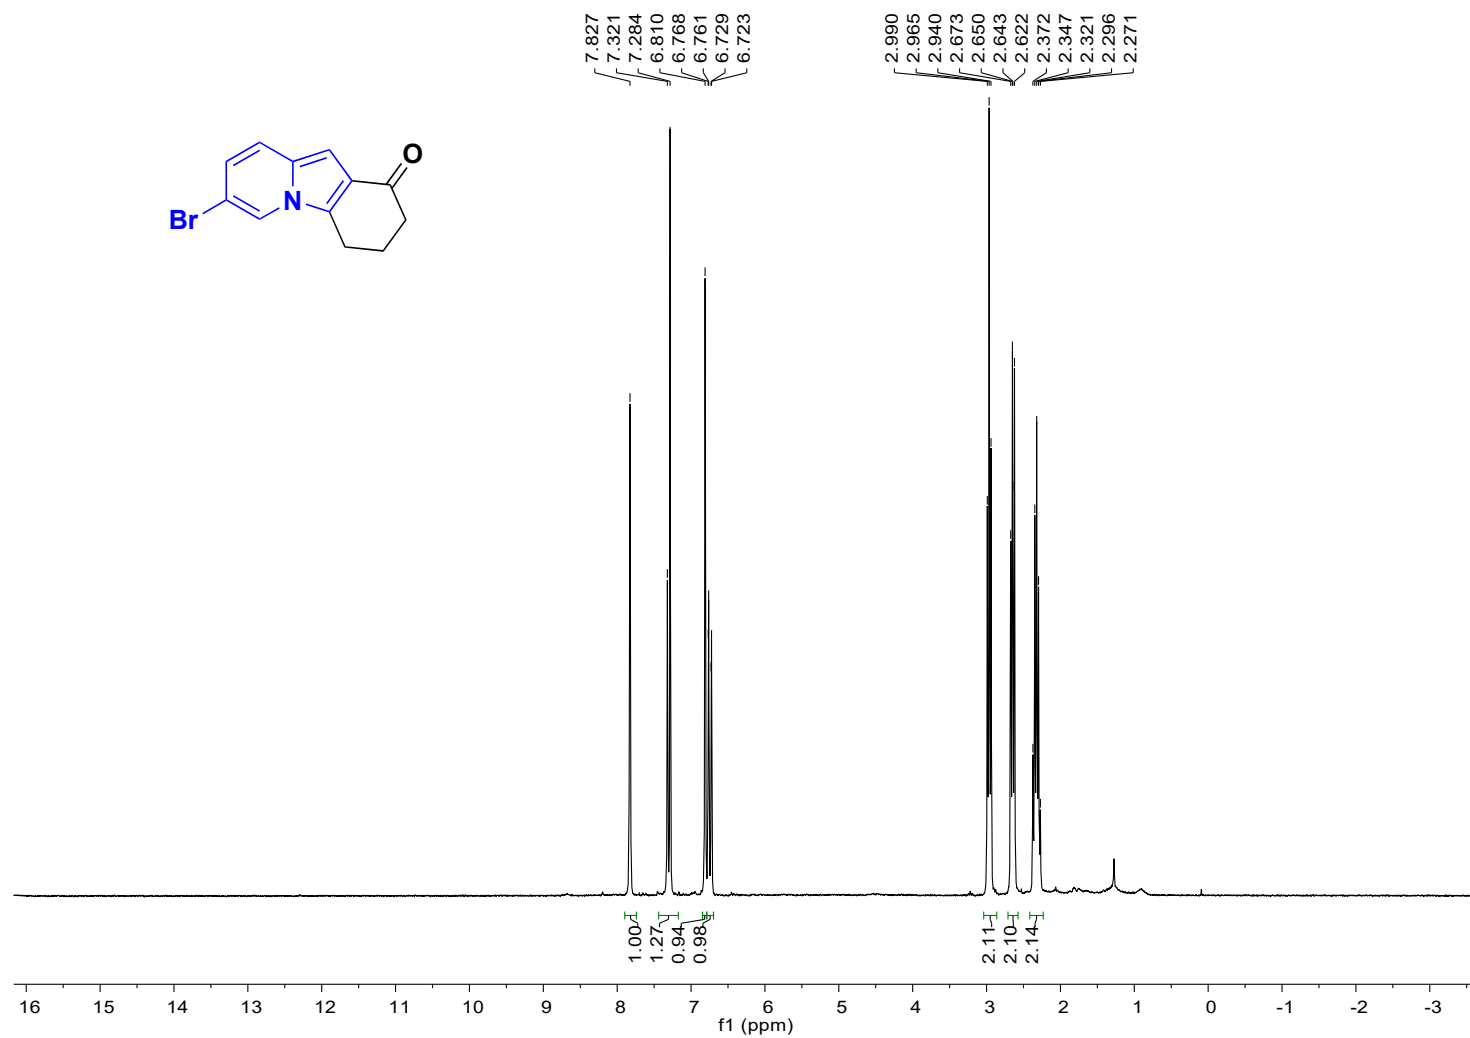

Figure S16.  $^1\text{H}$  NMR spectrum (500 MHz,  $\text{C}_6\text{D}_6$ ) of compound **5ia**.

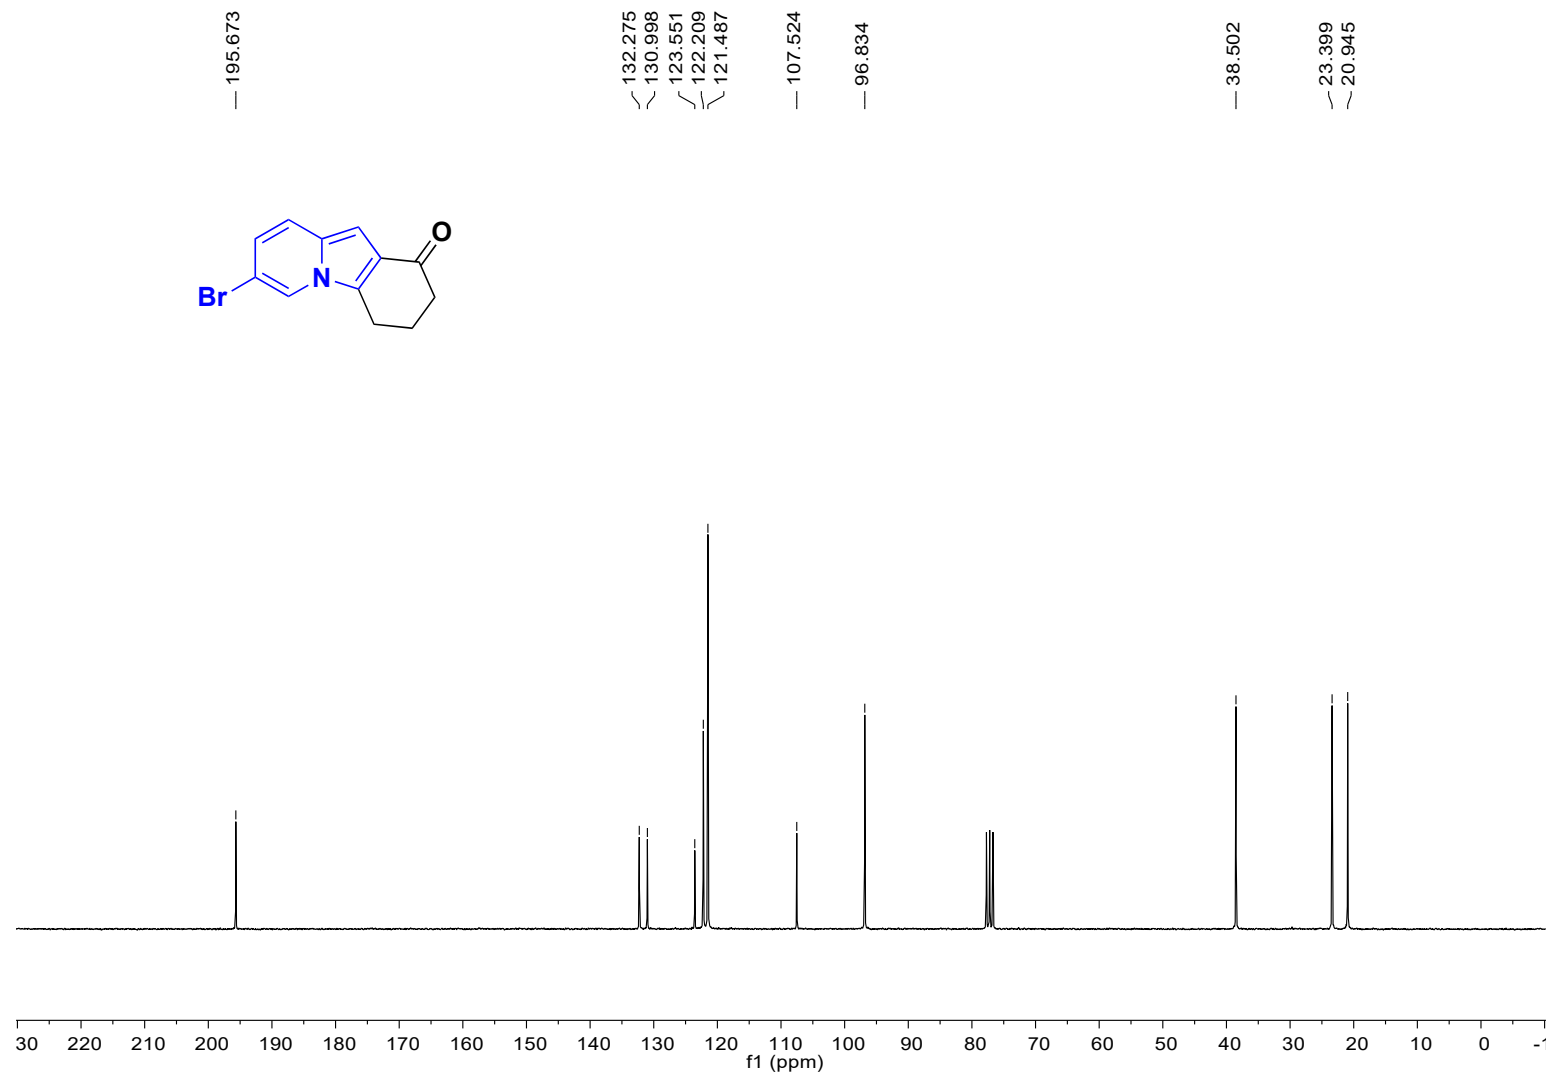

**Figure S17.** <sup>13</sup>C NMR spectrum (126 MHz, C<sub>6</sub>D<sub>6</sub>) of compound **5ia**.

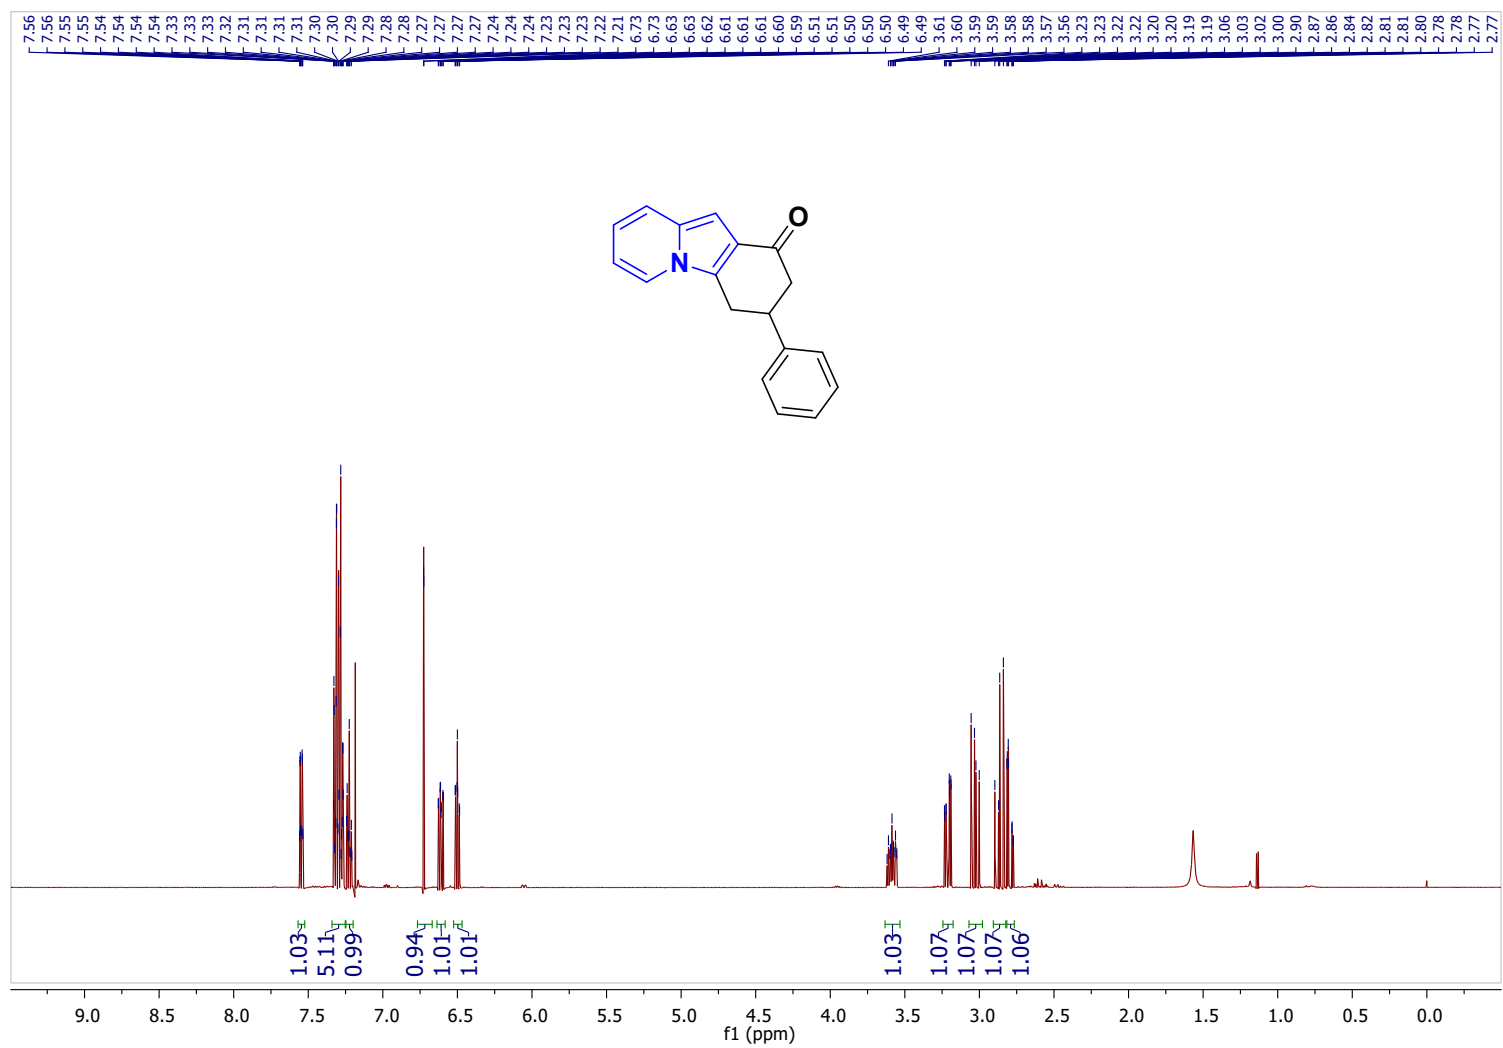

**Figure S18.** <sup>1</sup>H NMR spectrum (500 MHz, CDCl<sub>3</sub>) of compound **5ae**.

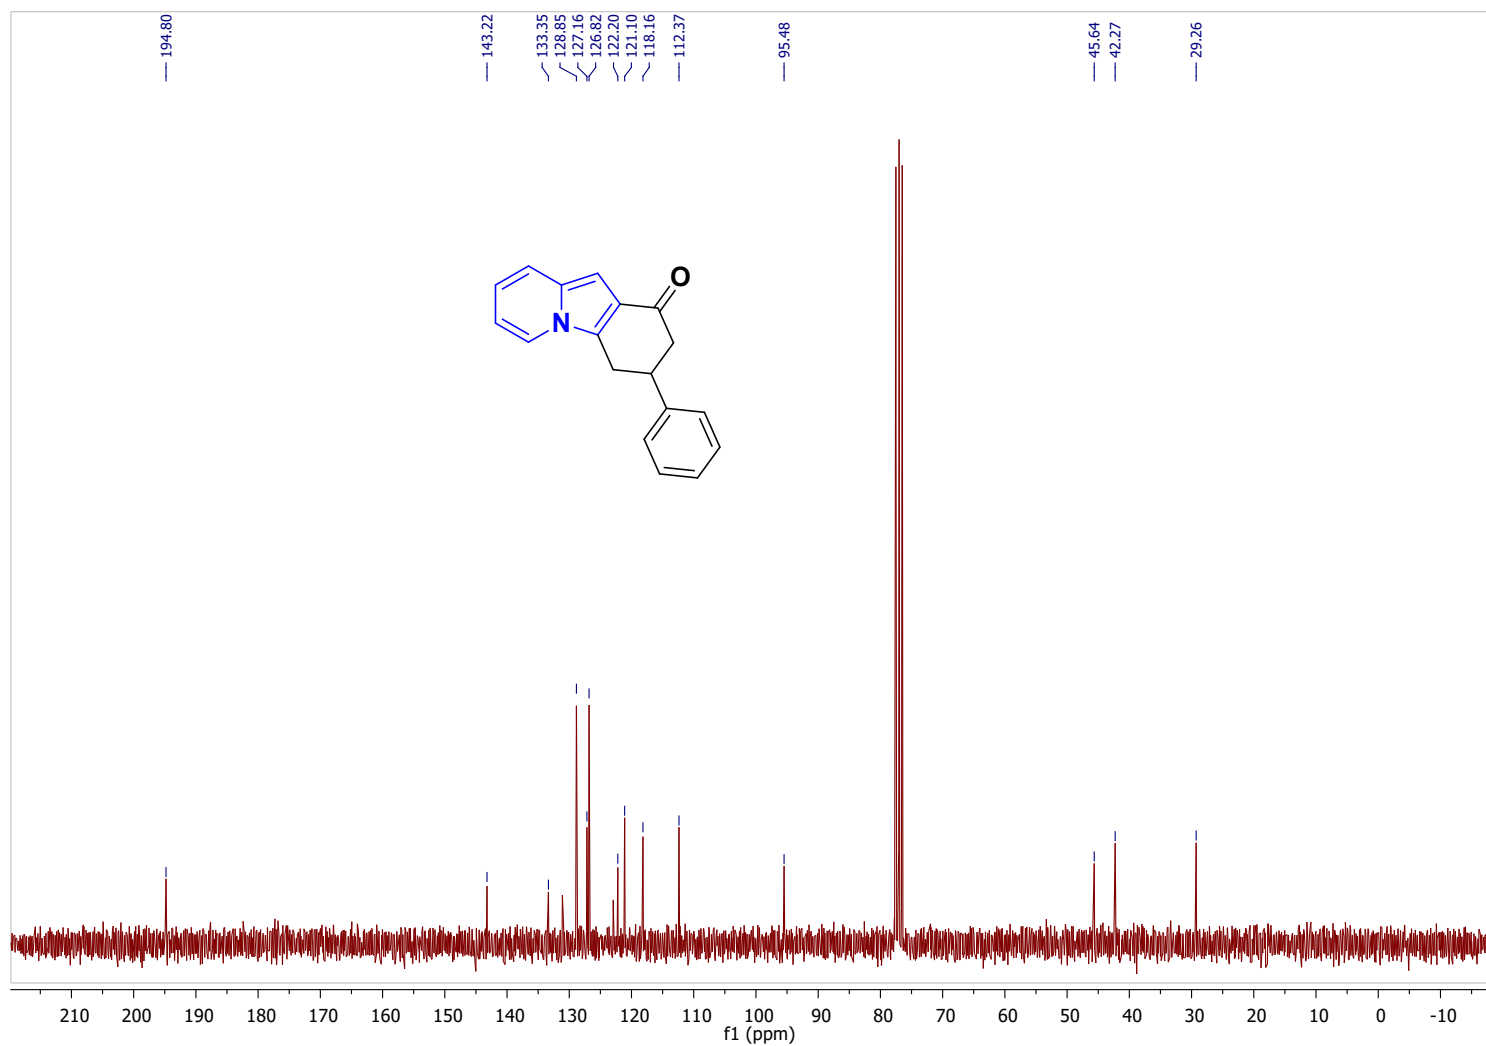

**Figure S19.** <sup>13</sup>C NMR spectrum (63 MHz, CDCl<sub>3</sub>) of compound **5ae**.

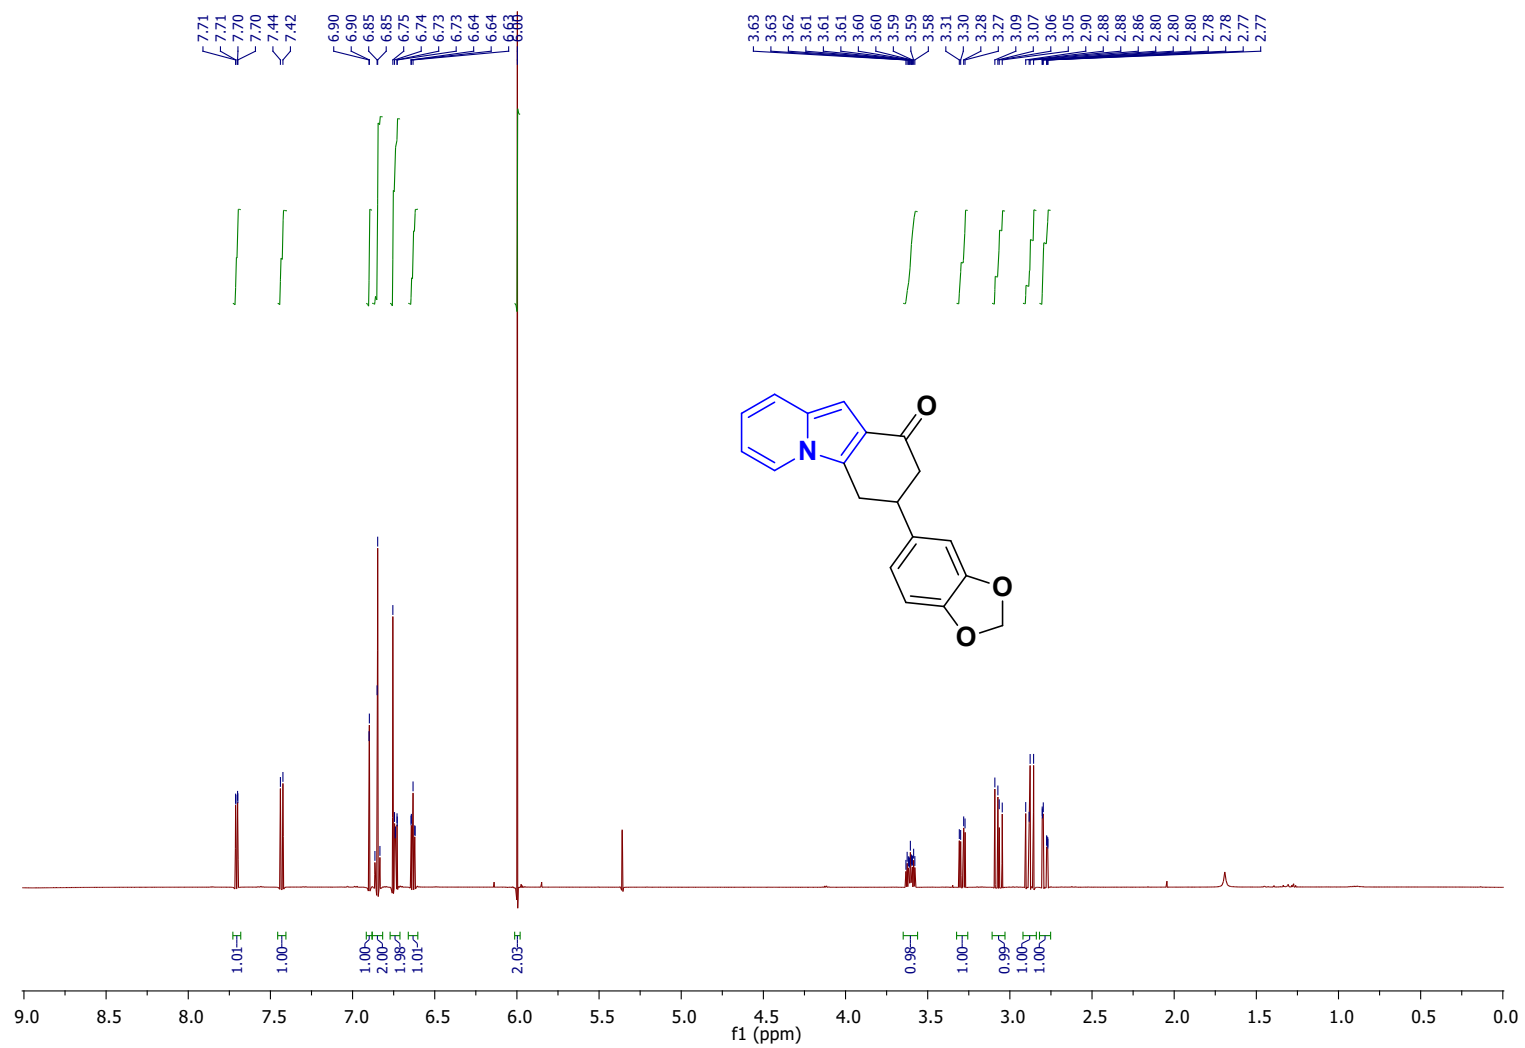

**Figure S20.**  $^1\text{H NMR}$  spectrum (600 MHz,  $\text{CD}_2\text{Cl}_2$ ) of compound **5af**.

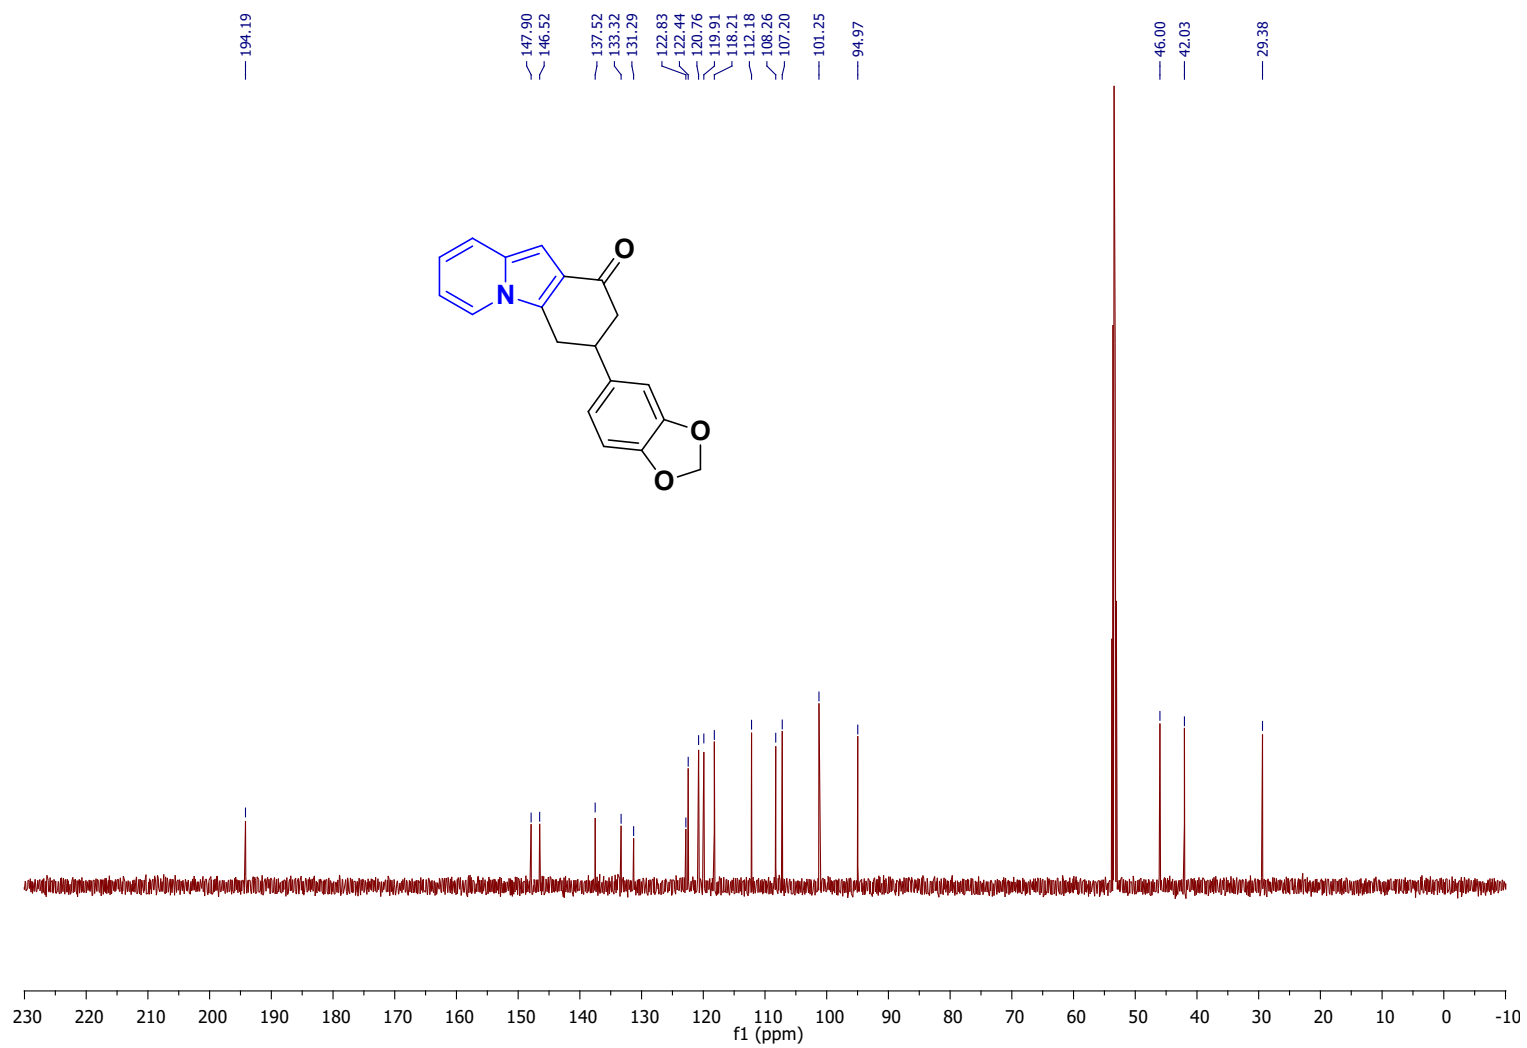

Figure S21. <sup>13</sup>C NMR spectrum (151 MHz, CD<sub>2</sub>Cl<sub>2</sub>) of compound 5af.

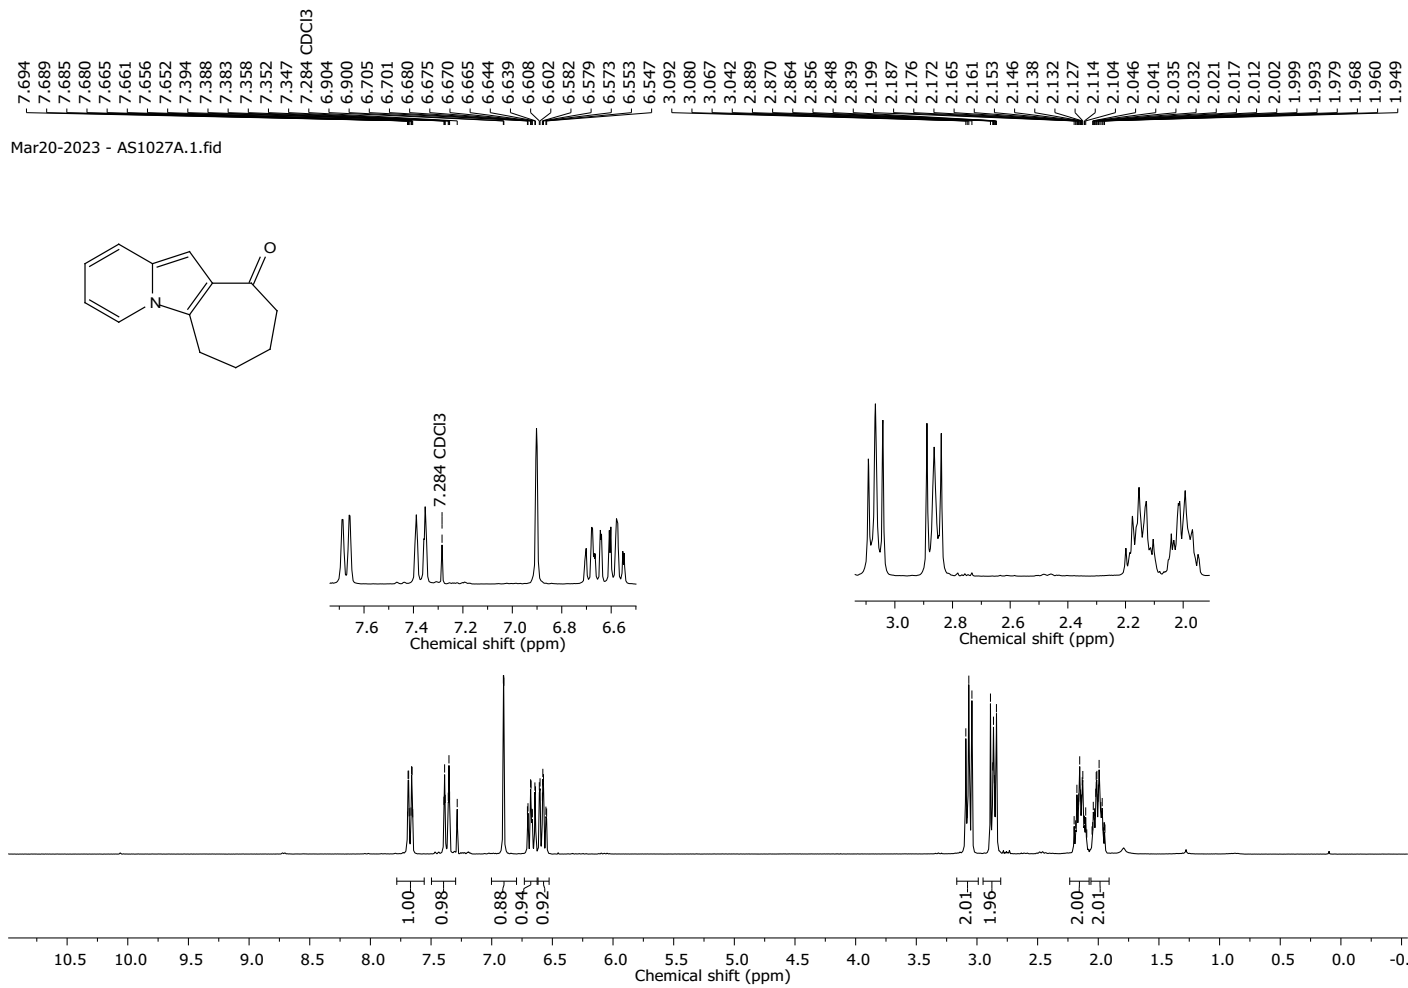

**Figure S22.** <sup>1</sup>H NMR spectrum (250 MHz, CDCl<sub>3</sub>) of compound **5ac**.



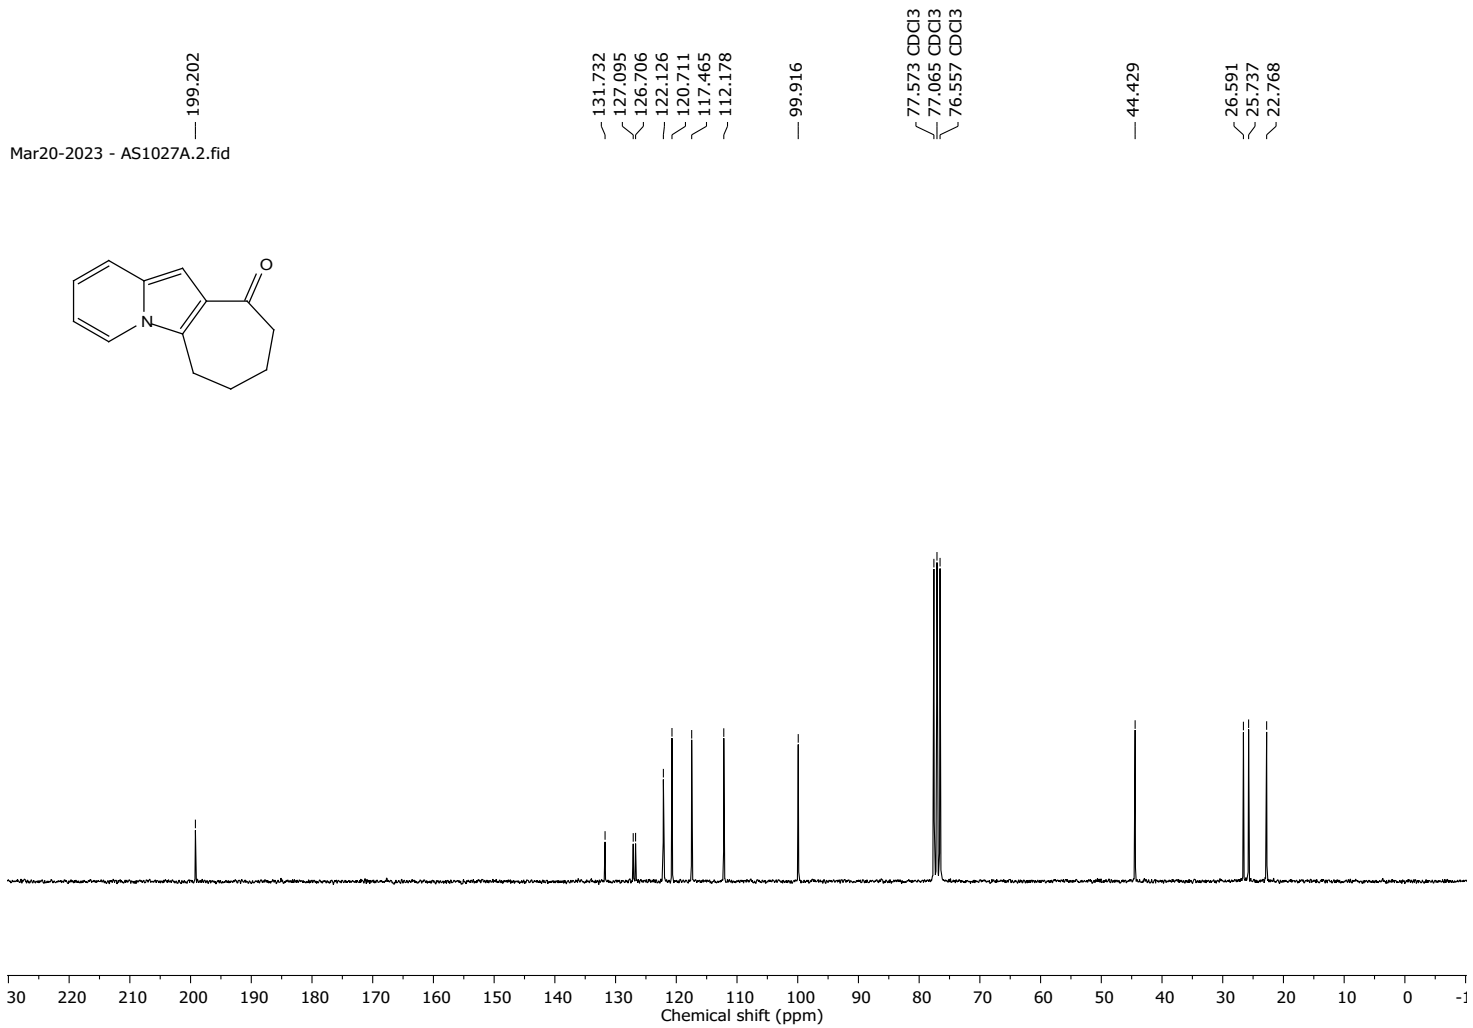

Figure S23. <sup>13</sup>C NMR spectrum (63 MHz, CDCl<sub>3</sub>) of compound **5ac**.

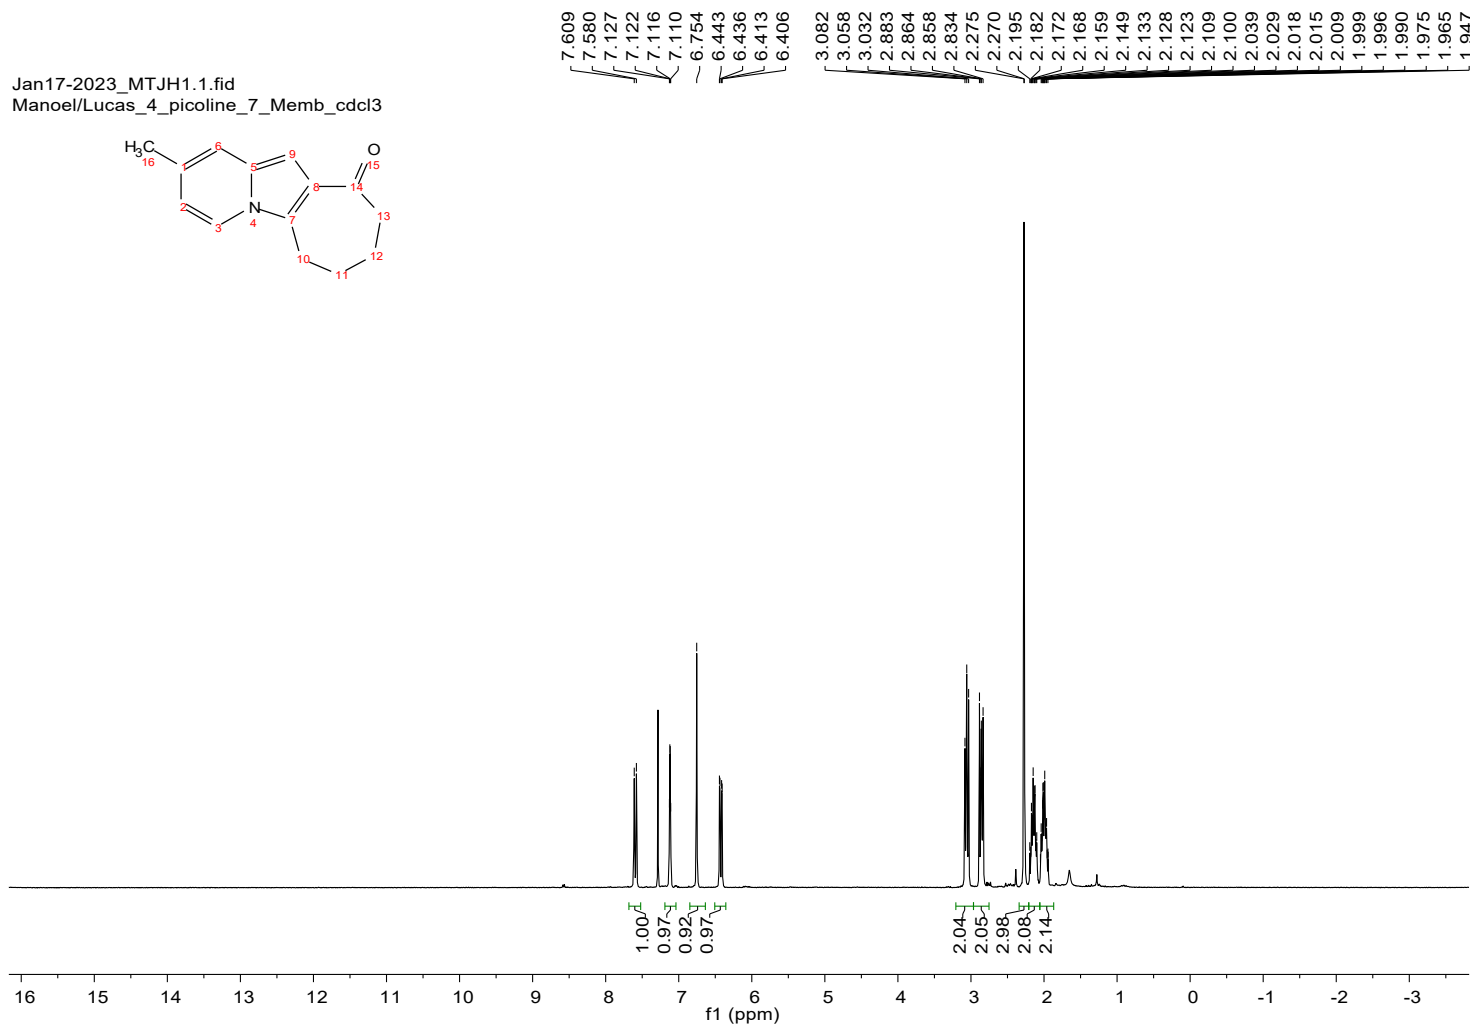

**Figure S24.** <sup>1</sup>H NMR spectrum (250 MHz, CDCl<sub>3</sub>) of compound **5bc**.

Jan17-2023\_MTJC1\_1.fid  
Manoel/Lucas\_4\_picblin\_7\_Memb\_cdcl3

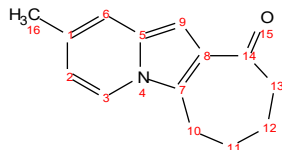

132.079  
127.592  
126.745  
126.623  
121.719  
118.336  
115.152

98.095

44.505

26.666  
25.803  
22.850  
20.975

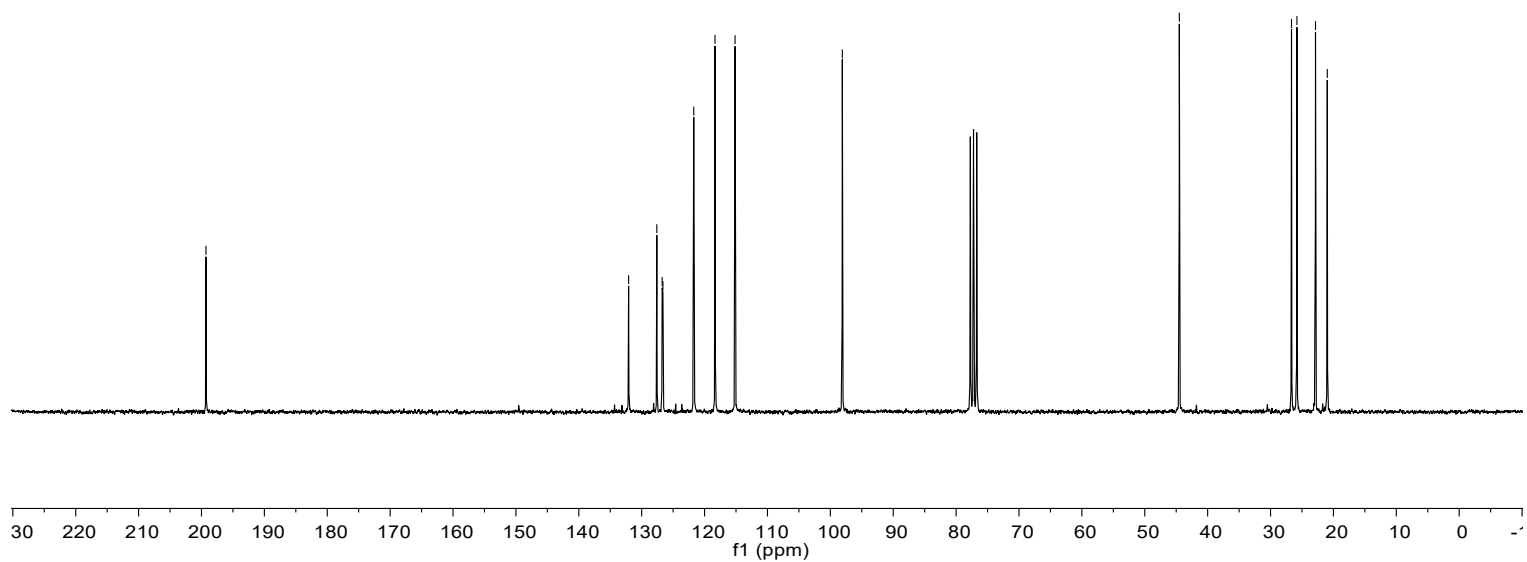

Figure S25. <sup>13</sup>C NMR spectrum (63 MHz, CDCl<sub>3</sub>) of compound **5bc**.

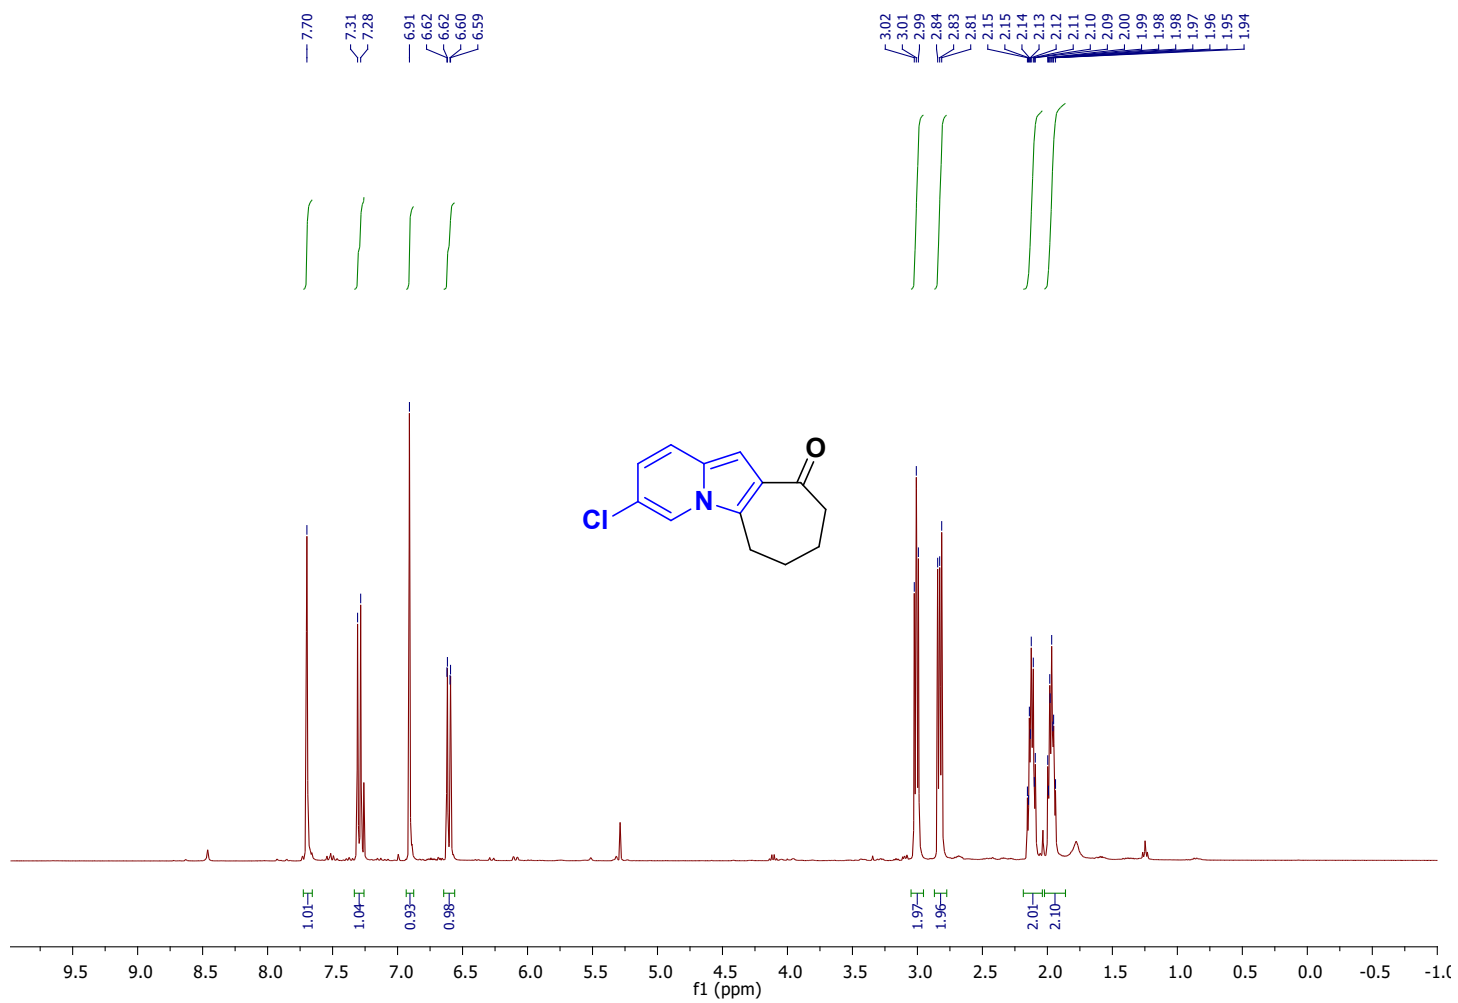

Figure S26. <sup>1</sup>H NMR spectrum (400 MHz, CDCl<sub>3</sub>) of compound 5gc.

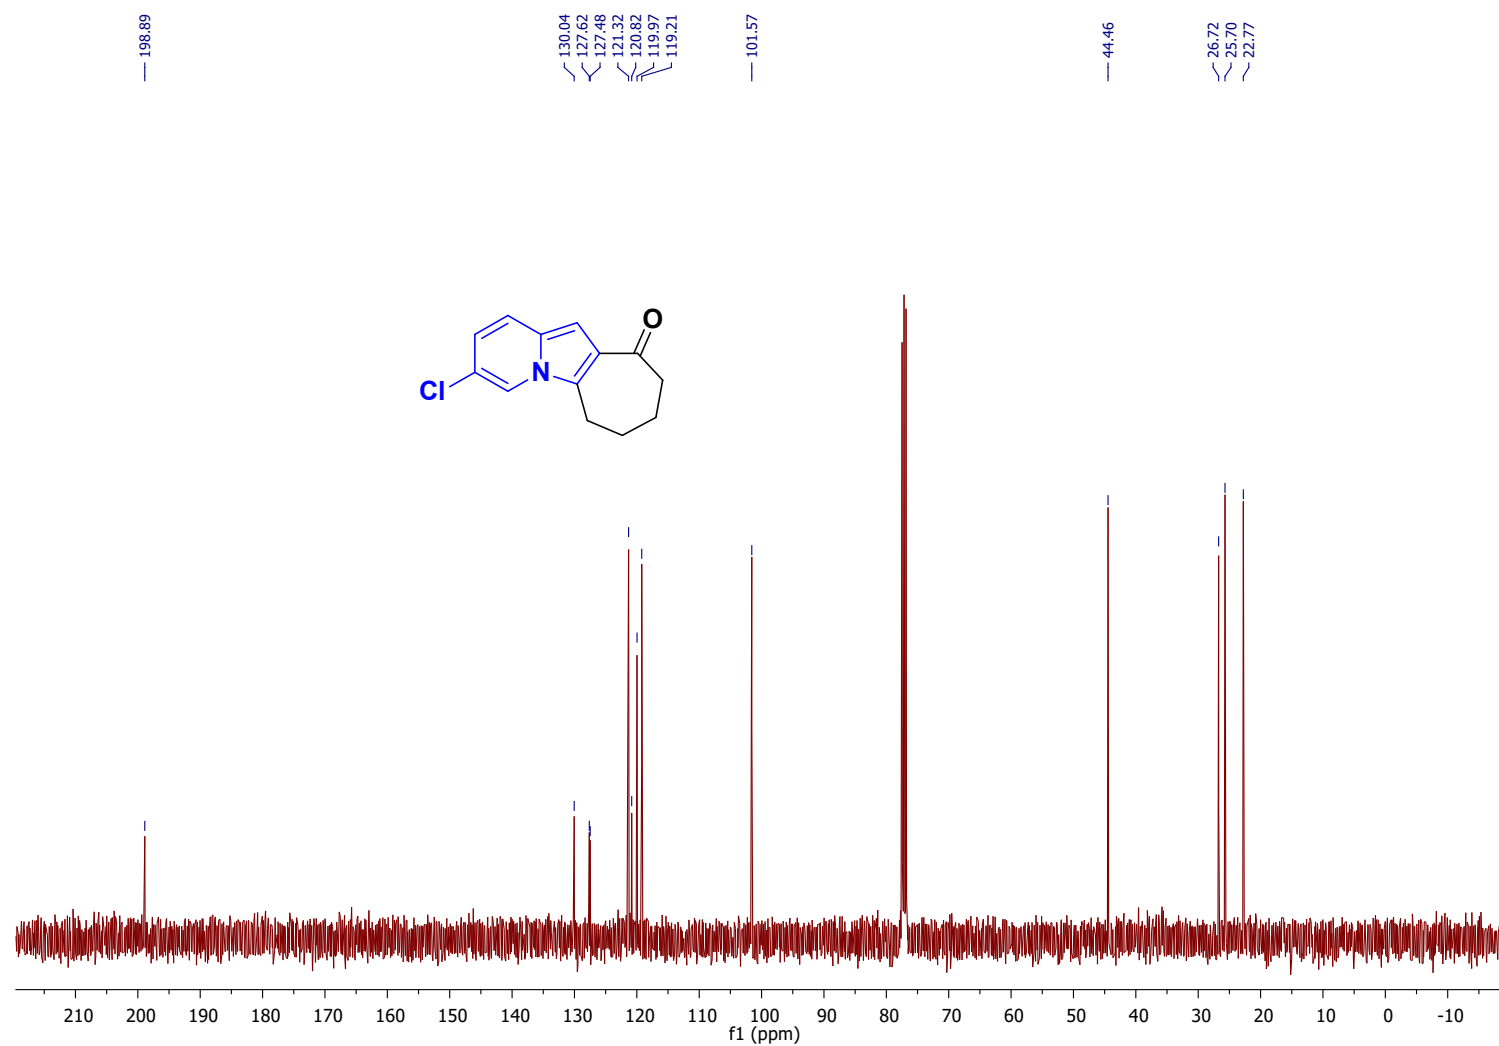

**Figure S27.**  $^{13}\text{C}$  NMR spectrum (101 MHz,  $\text{CDCl}_3$ ) of compound **5gc**.

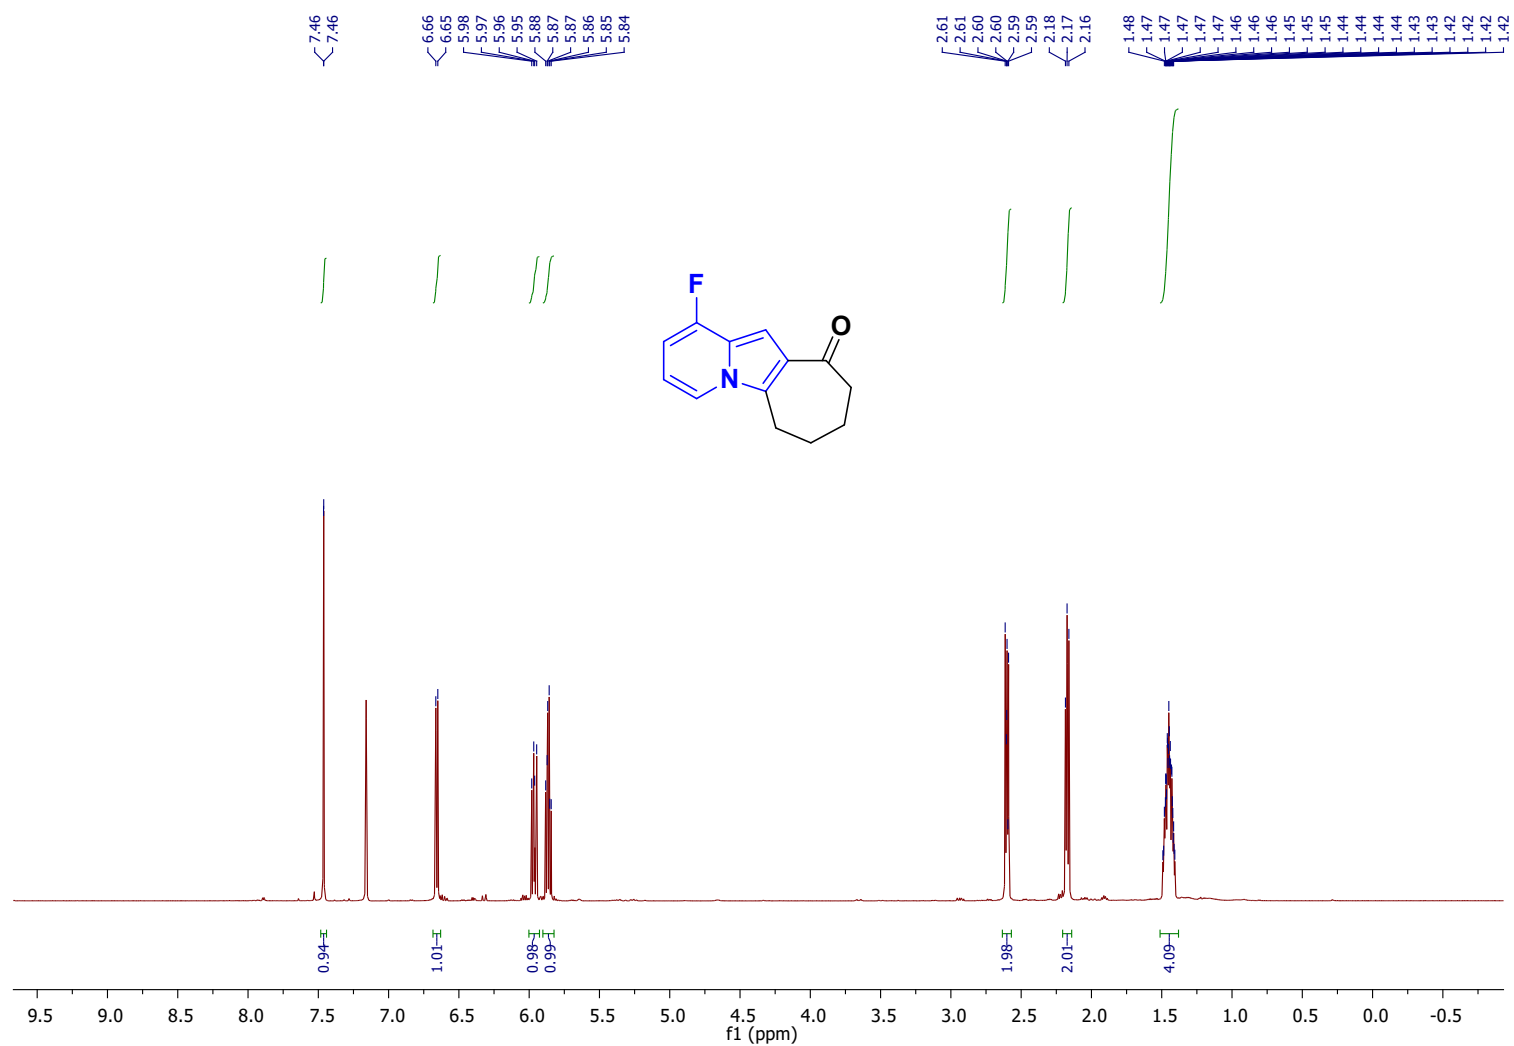

Figure S28. <sup>1</sup>H NMR spectrum (500 MHz, C<sub>6</sub>D<sub>6</sub>) of compound 5fc.

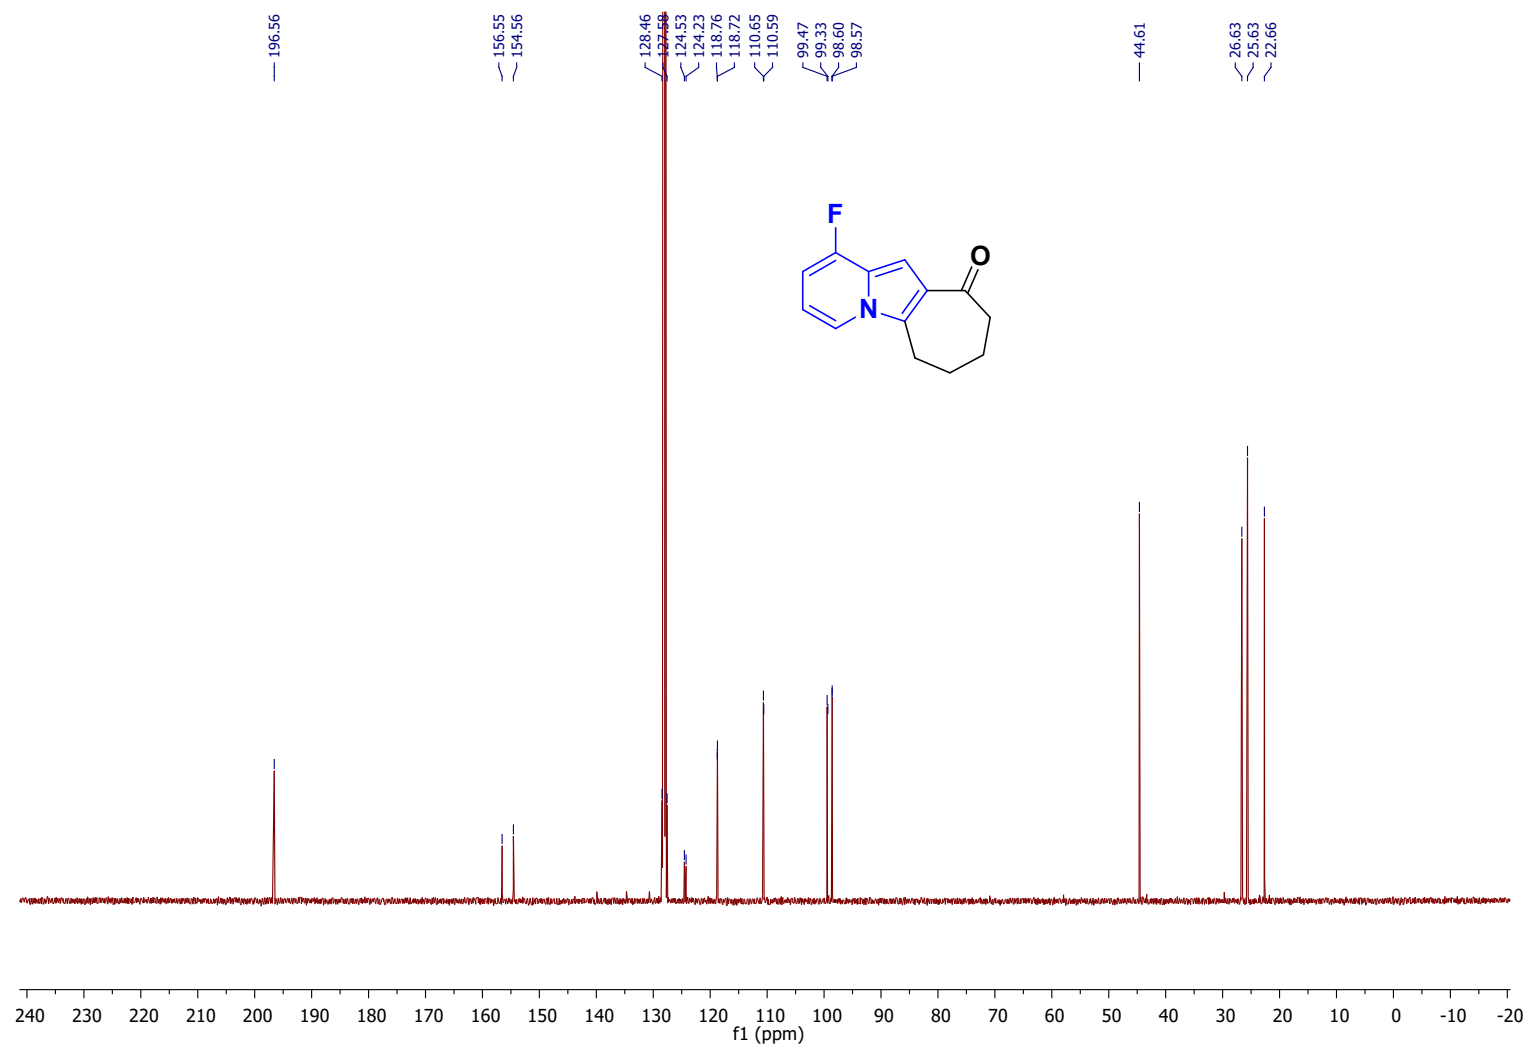

Figure S29.  $^{13}\text{C}$  NMR spectrum (126 MHz,  $\text{C}_6\text{D}_6$ ) of compound 5fc.

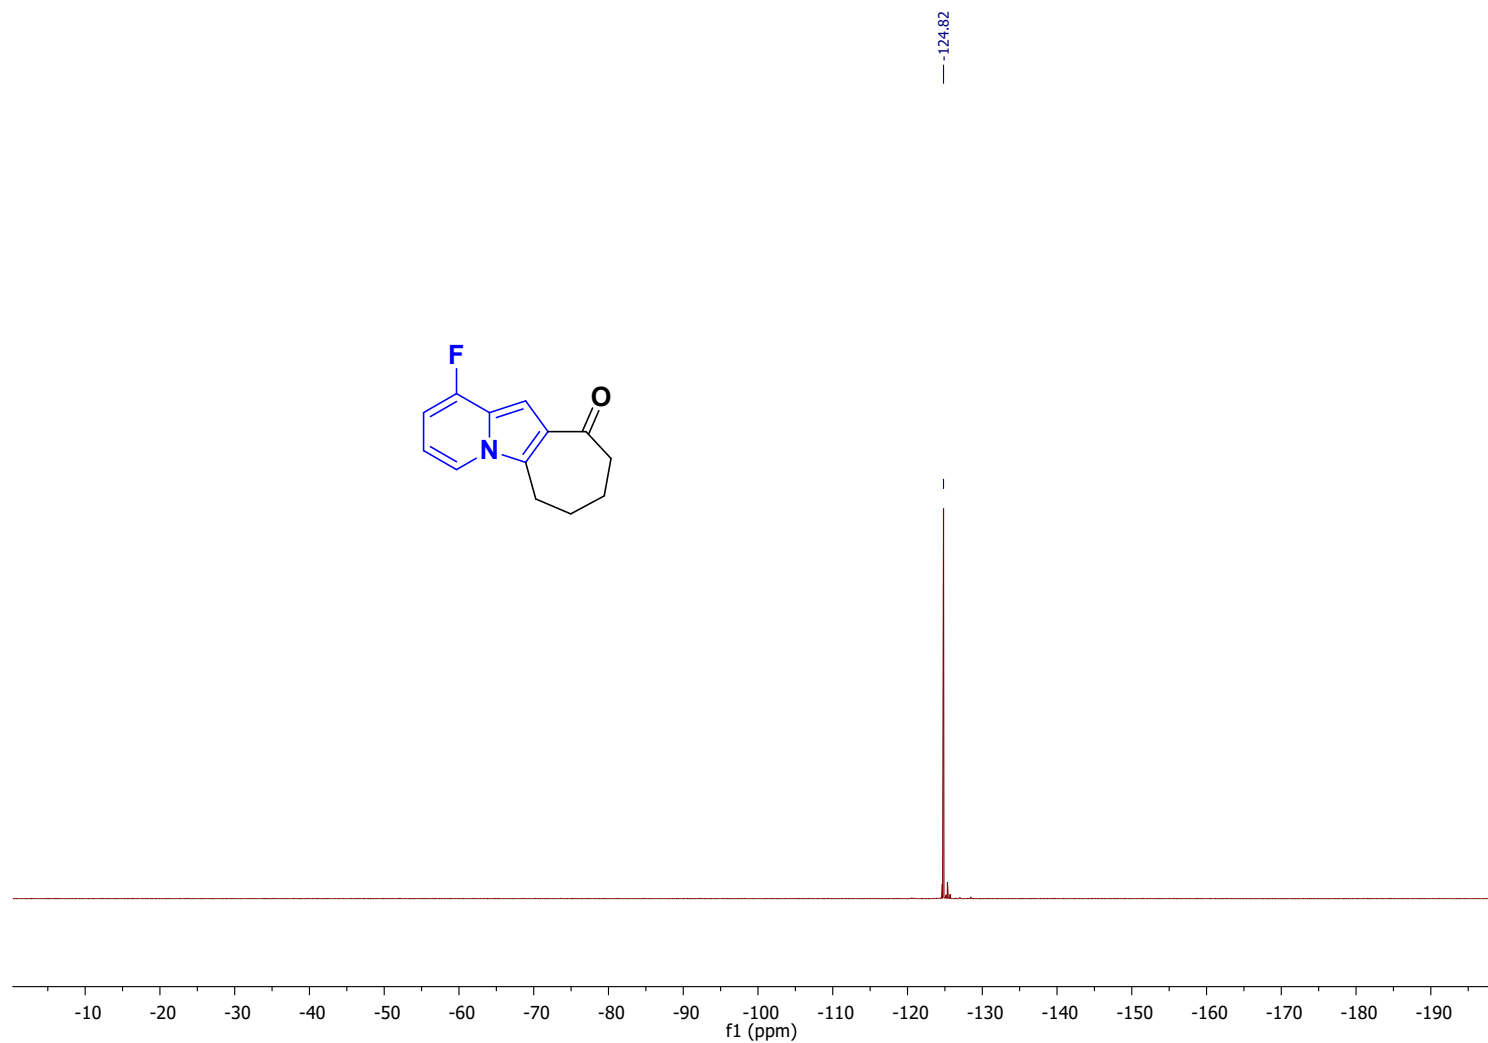

**Figure S30.**  $^{19}\text{F}$  NMR spectrum (470 MHz,  $\text{C}_6\text{D}_6$ ) of compound **5fc**.



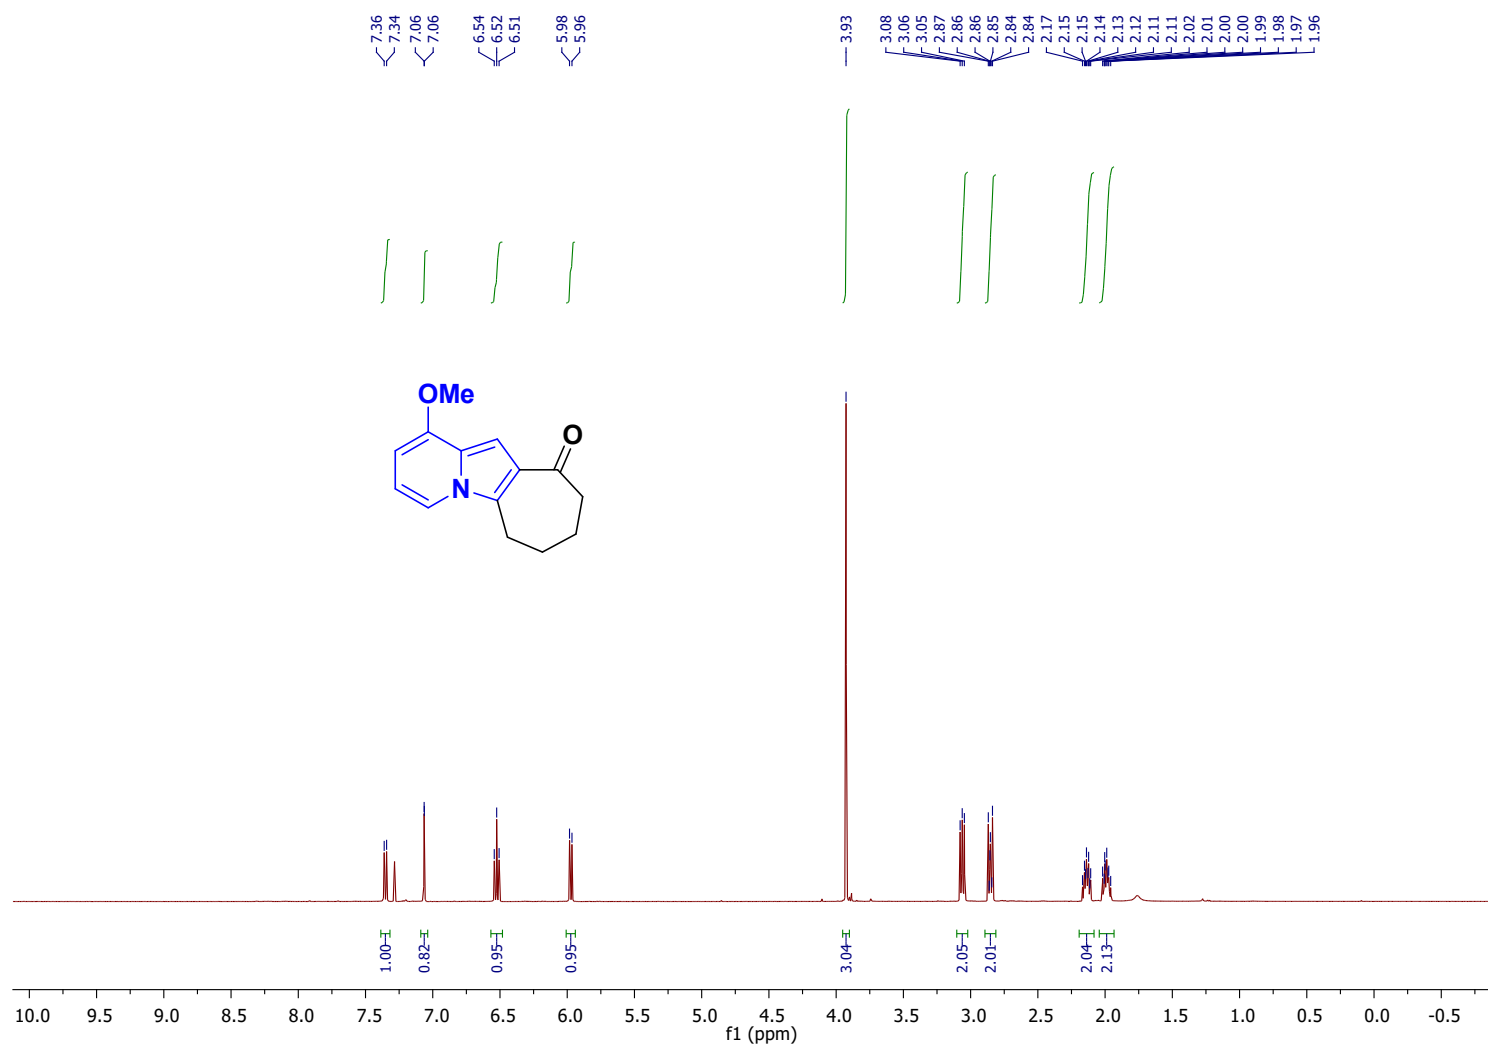

**Figure S31.** <sup>1</sup>H NMR spectrum (400 MHz, CDCl<sub>3</sub>) of compound **5cc**.

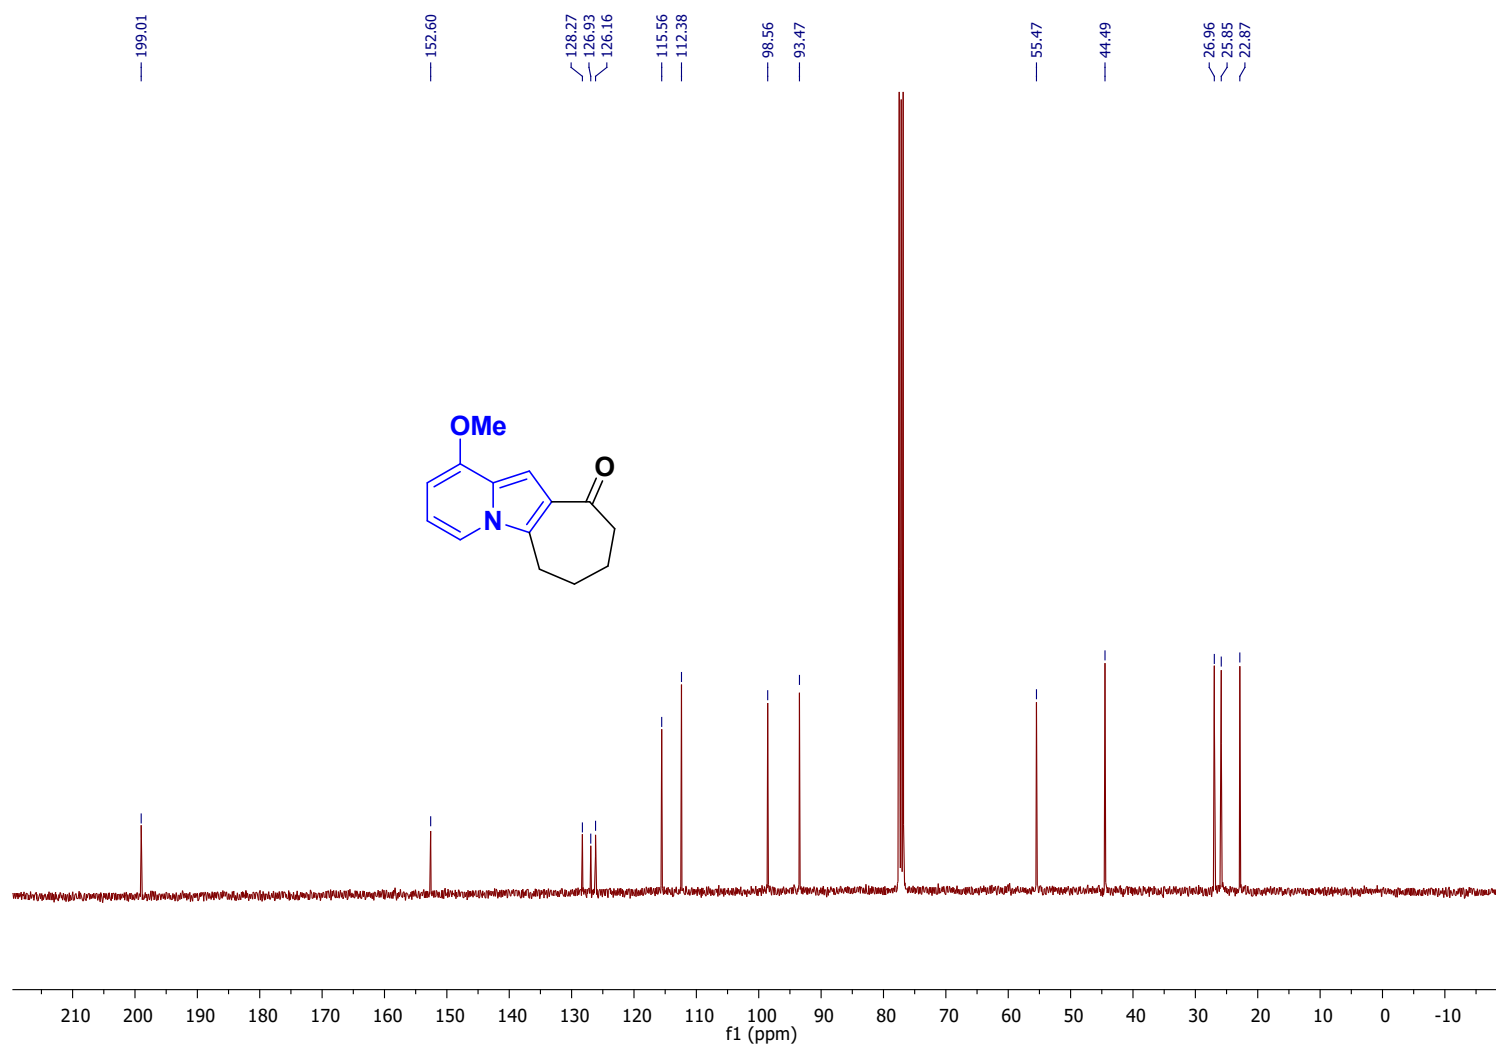

Figure 32.  $^{13}\text{C}$  NMR spectrum (101 MHz,  $\text{CDCl}_3$ ) of compound 5cc.

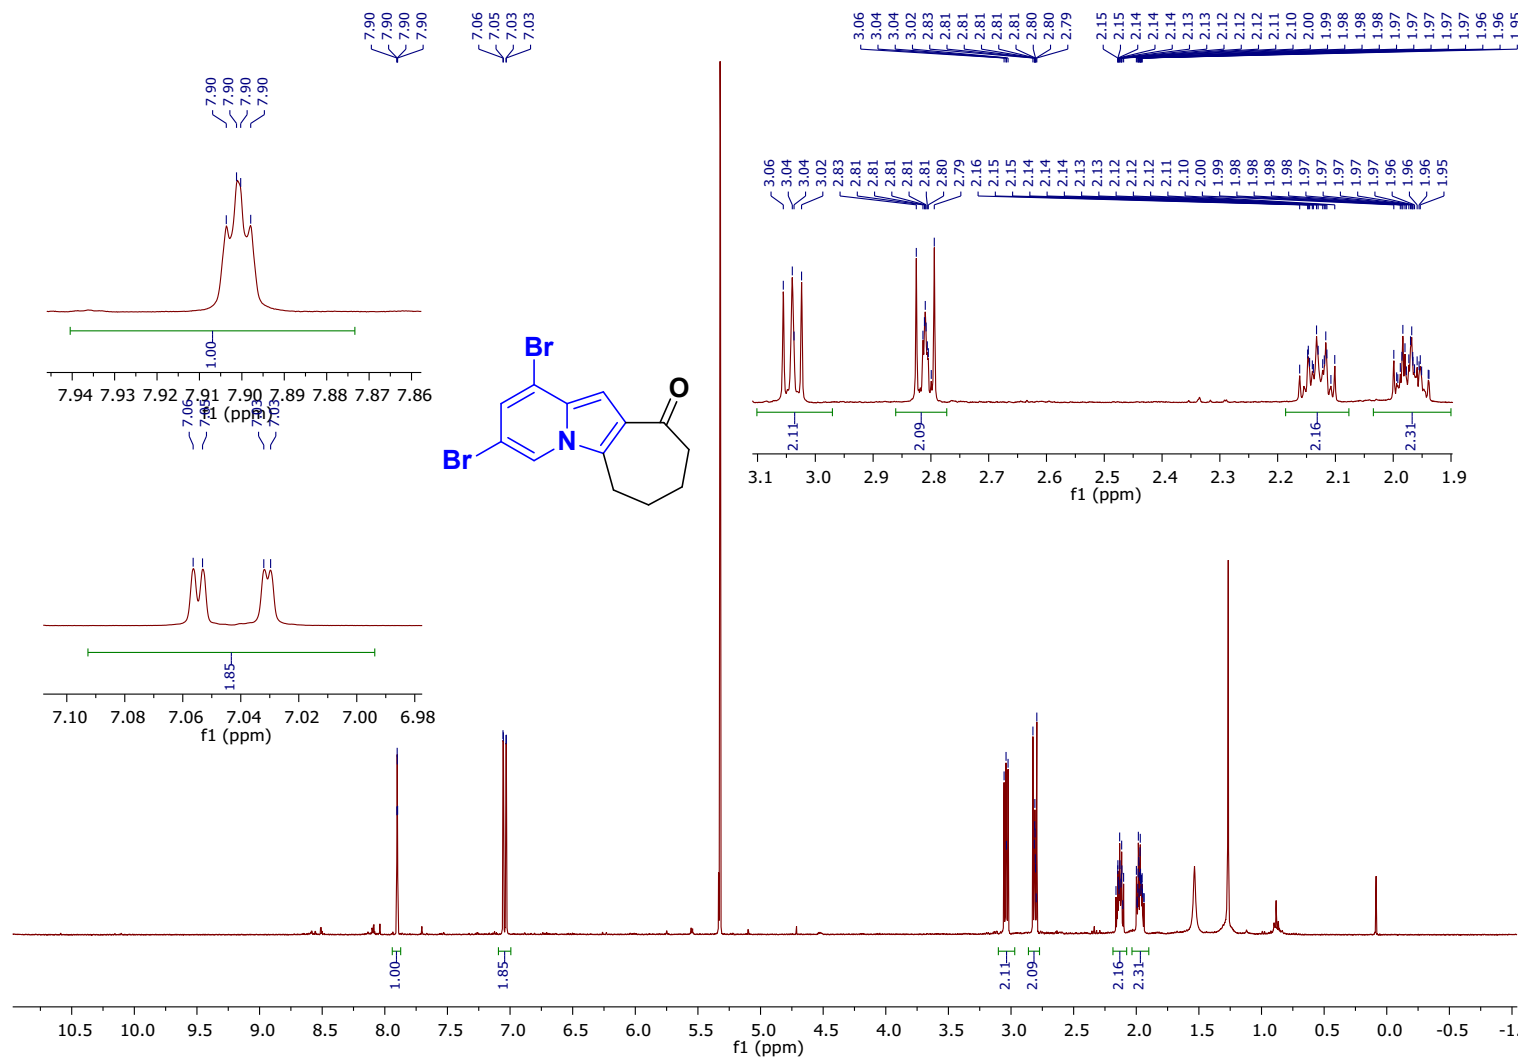

**Figure S33.**  $^1\text{H}$  NMR spectrum (400 MHz,  $\text{CD}_2\text{Cl}_2$ ) of compound **5hc**.

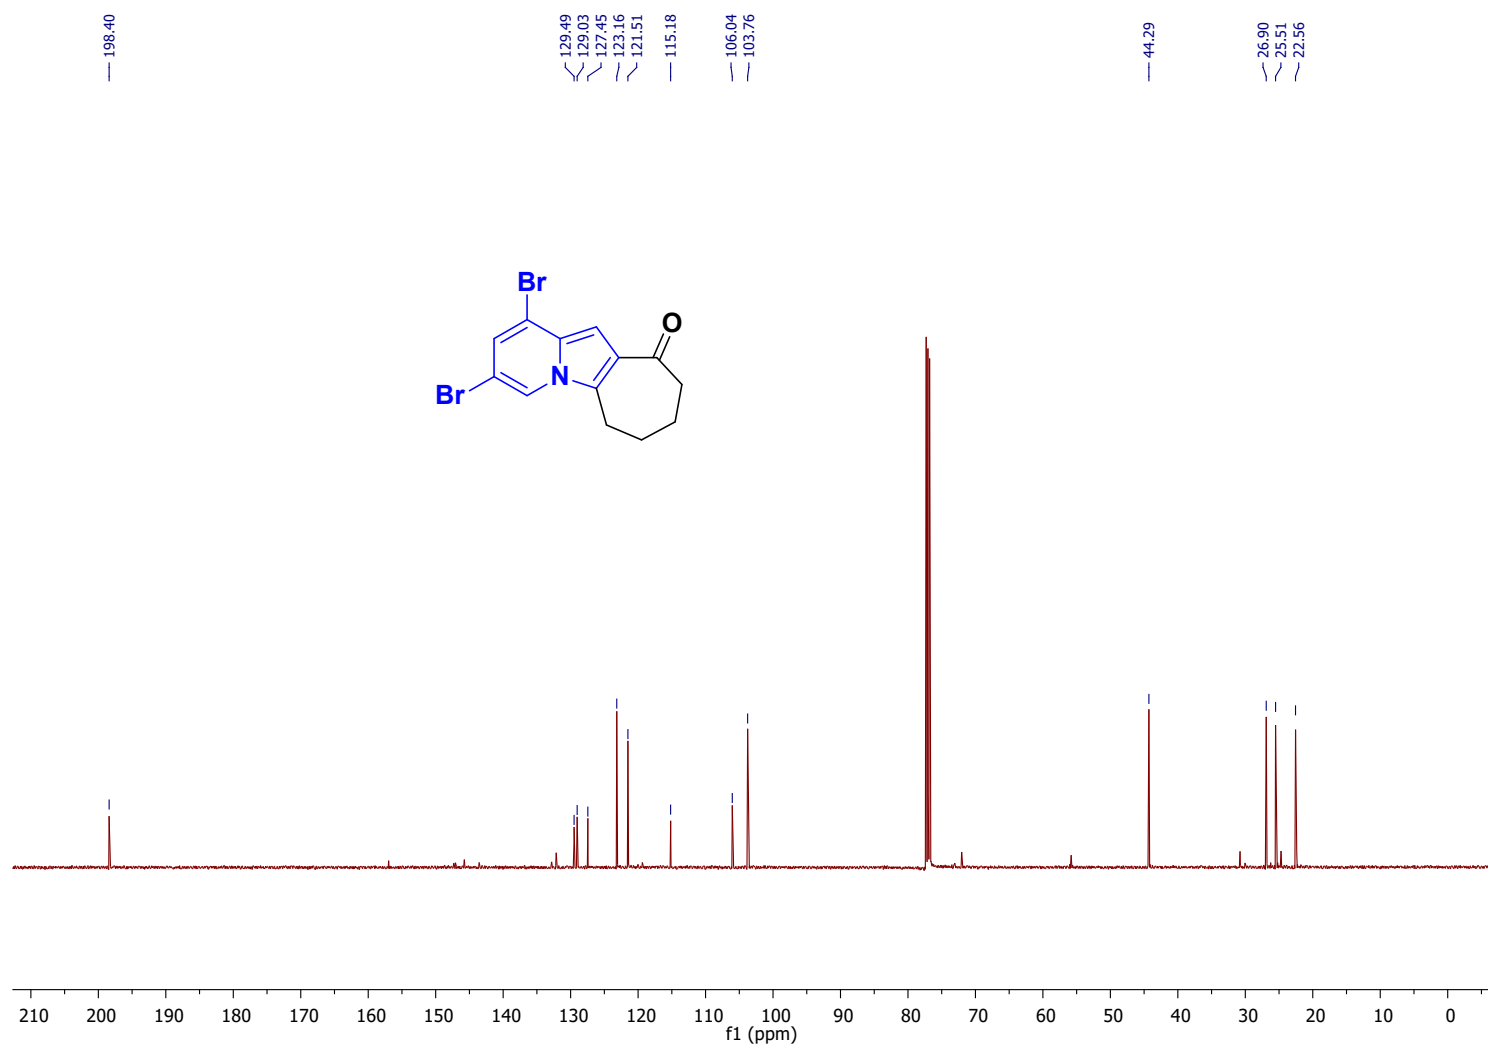

**Figure S34.**  $^{13}\text{C}$  NMR spectrum (126 MHz,  $\text{CDCl}_3$ ) of compound **5hc**.

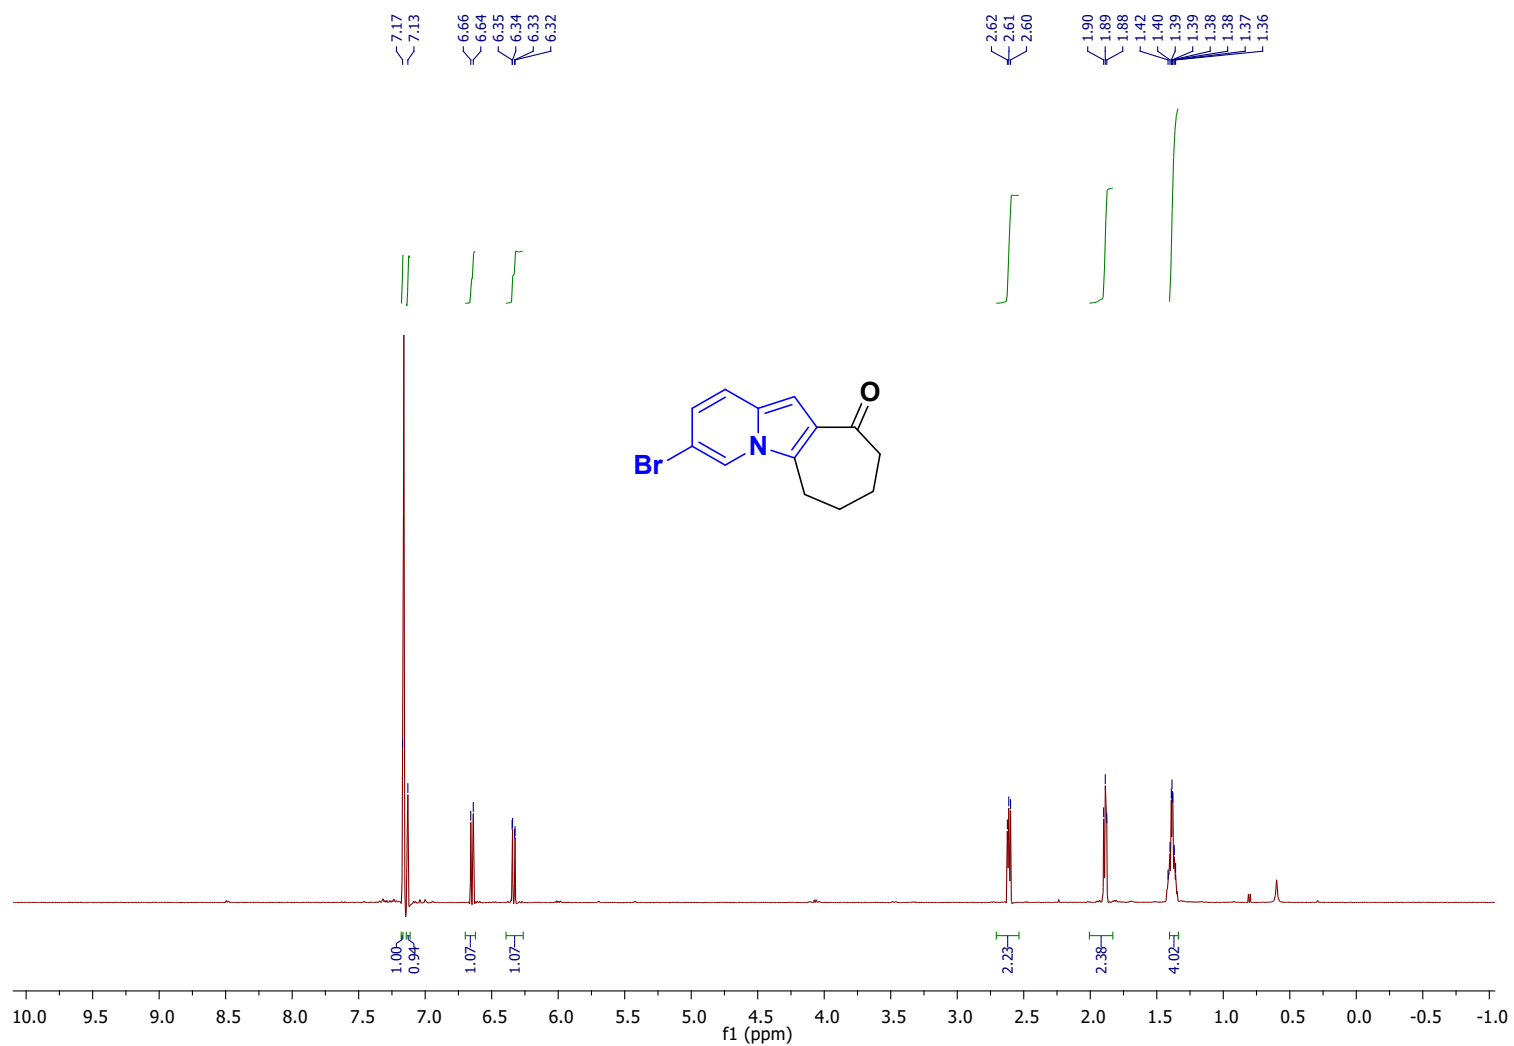

Figure S35.  $^1\text{H}$  NMR spectrum (250 MHz,  $\text{CDCl}_3$ ) of compound **5ic**.

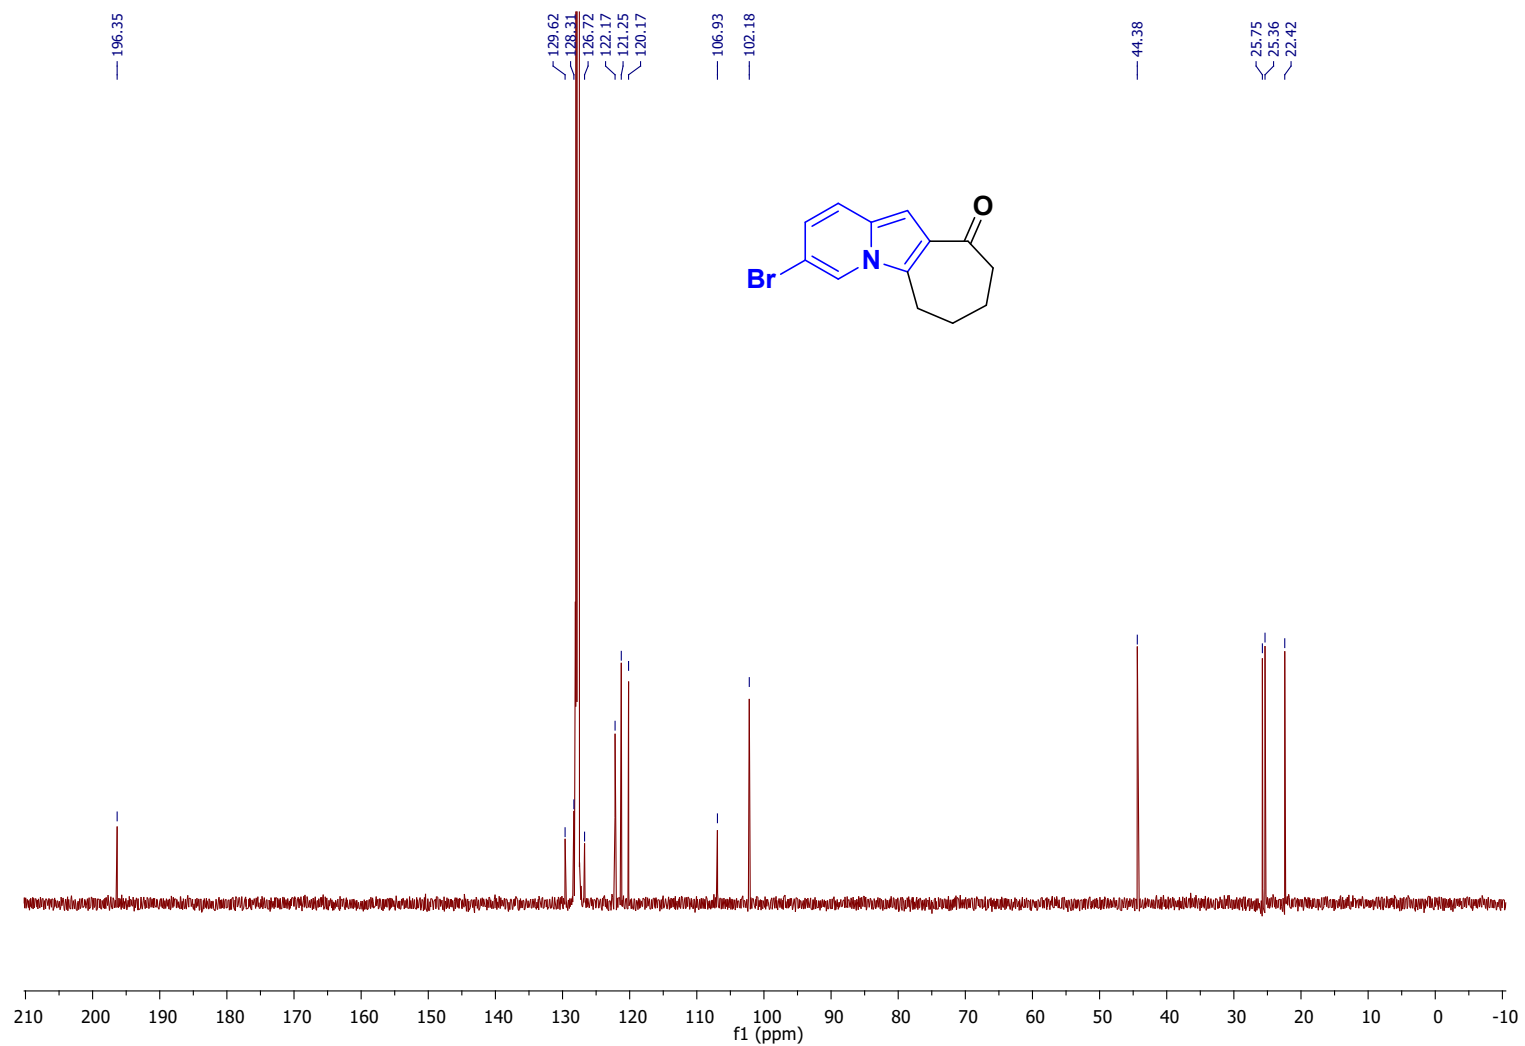

Figure S36.  $^{13}\text{C}$  NMR spectrum (62.5 MHz,  $\text{CDCl}_3$ ) of compound **5ic**.

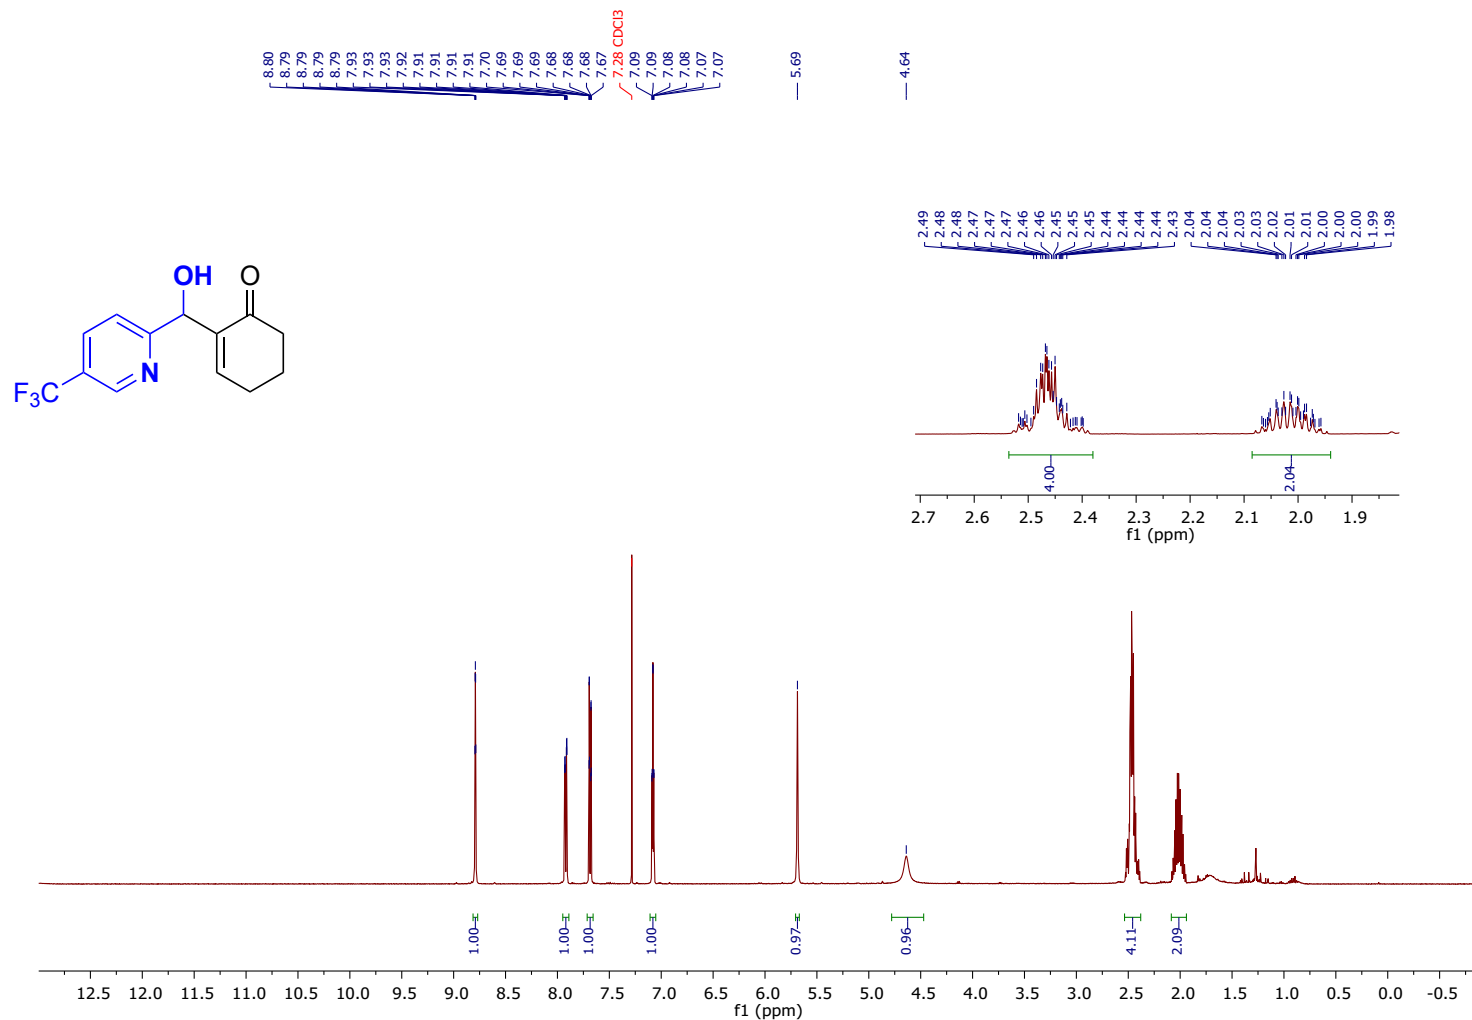

**Figure S37.** <sup>1</sup>H NMR spectrum (500 MHz, CDCl<sub>3</sub>) of compound 4ja.

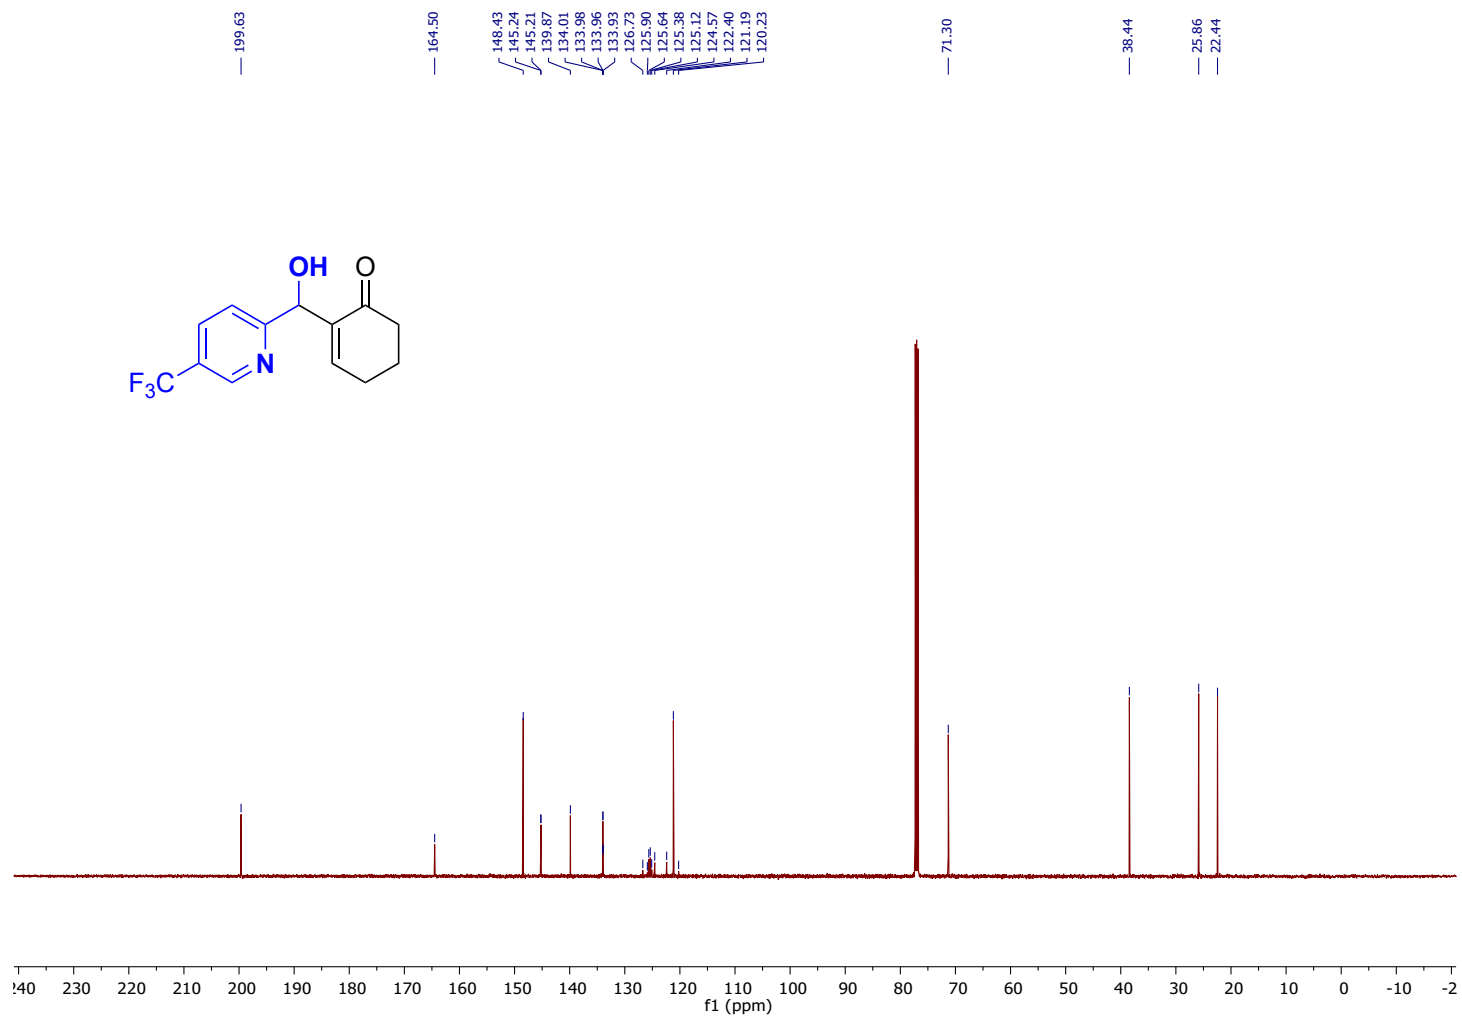

Figure S38. <sup>13</sup>C NMR spectrum (126 MHz, CDCl<sub>3</sub>) of compound 4ja.



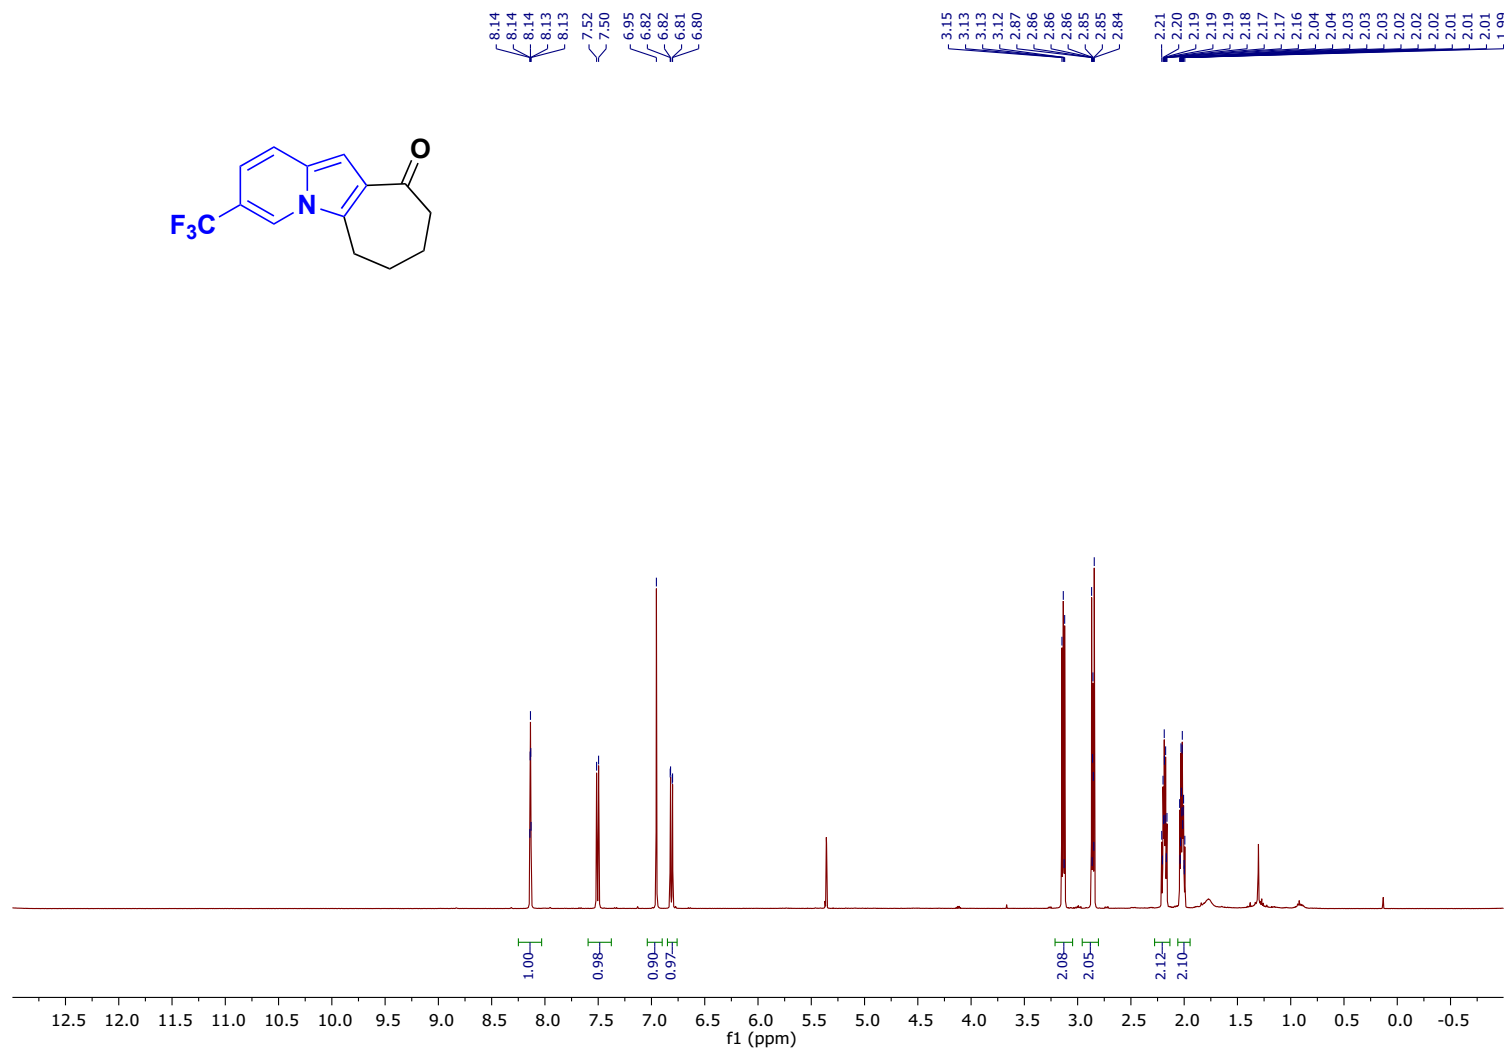

**Figure S39.** <sup>1</sup>H NMR spectrum (500 MHz, CD<sub>2</sub>Cl<sub>2</sub>) of compound **5jc**.

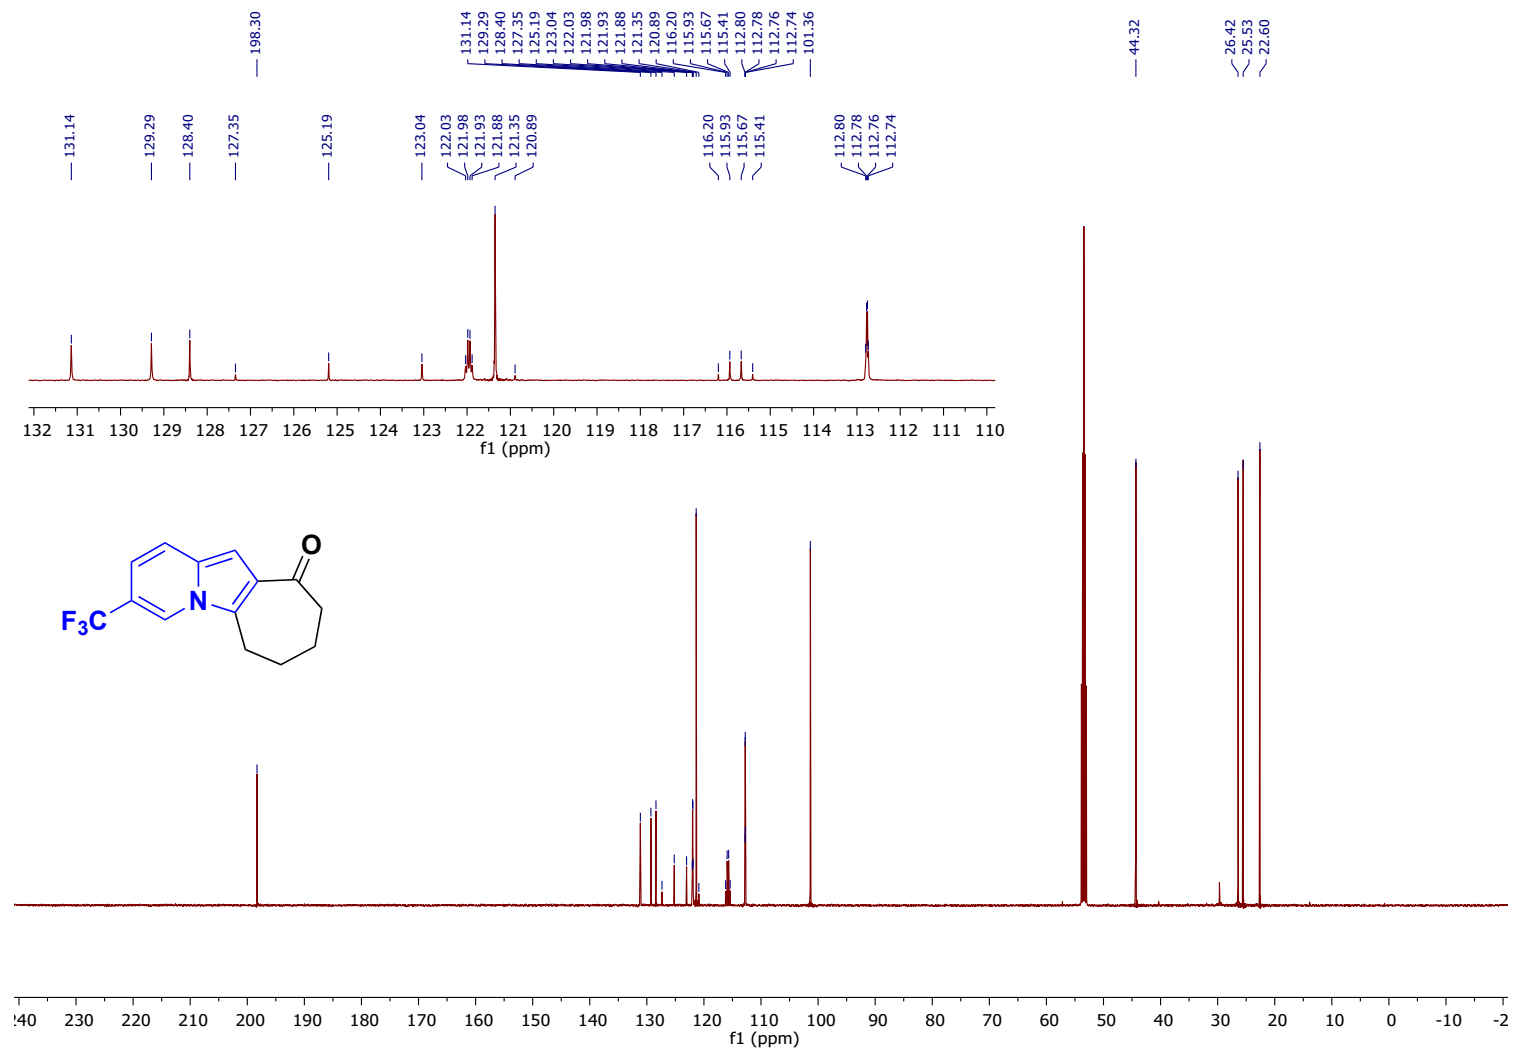

**Figure S40.**  $^{13}\text{C}$  NMR spectrum (126 MHz,  $\text{CDCl}_3$ ) of compound **5jc**.

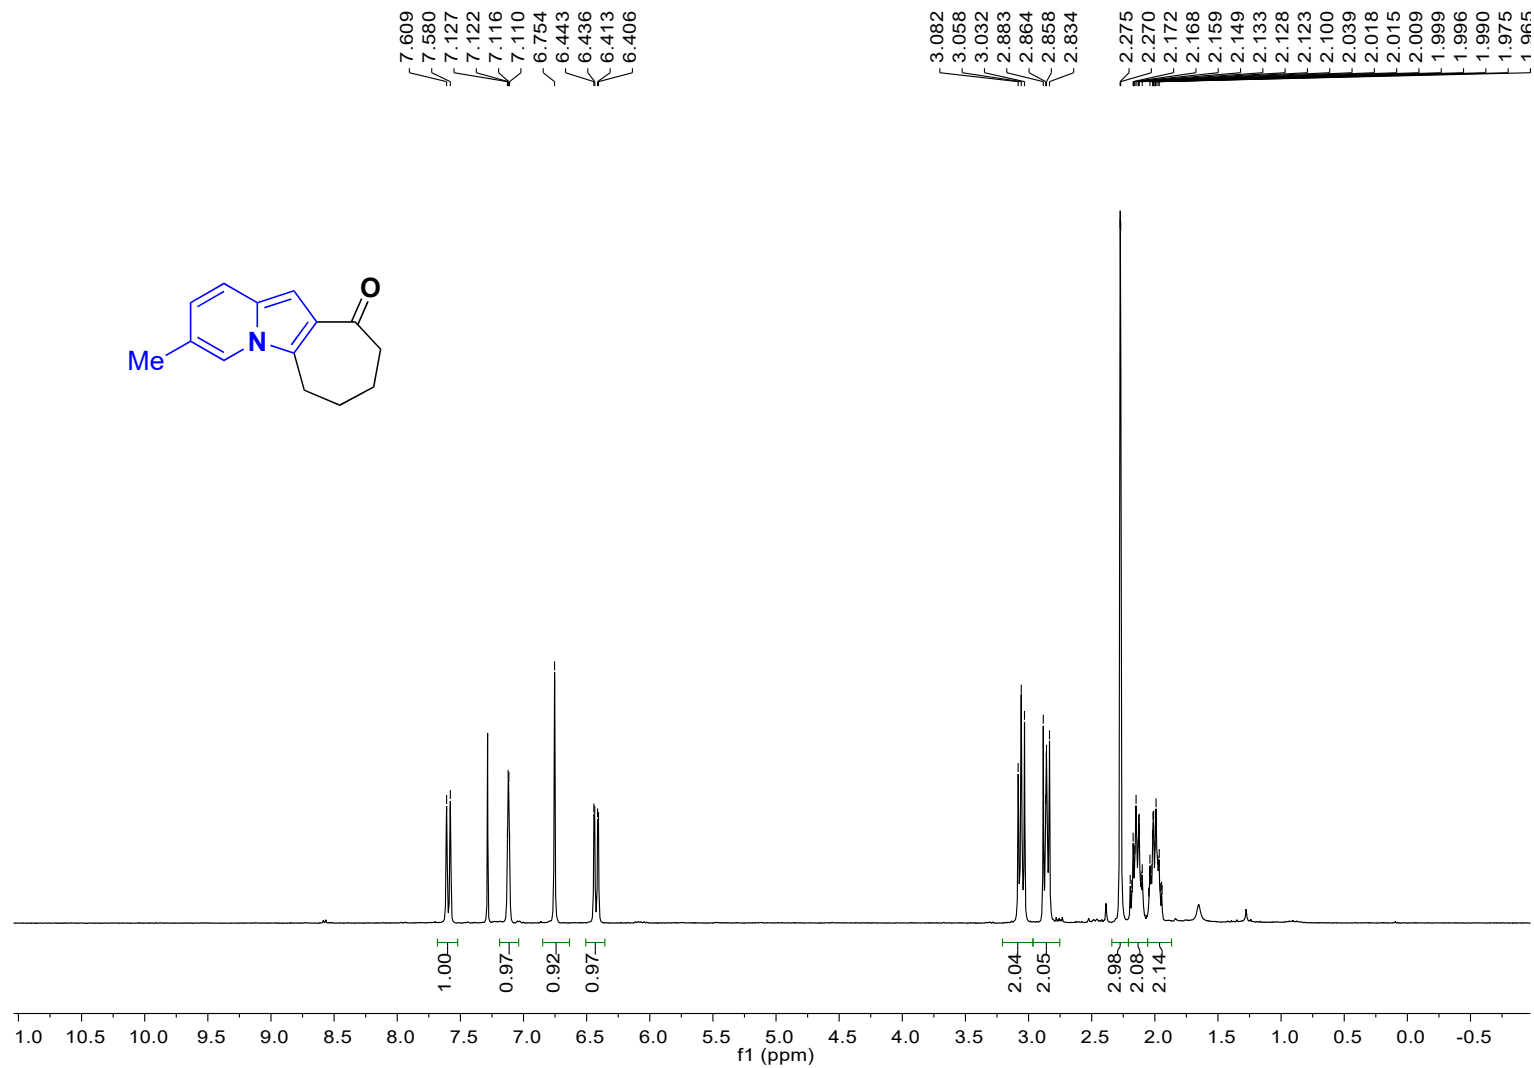

Figure S41. <sup>1</sup>H NMR spectrum (250 MHz, CDCl<sub>3</sub>) of compound **5dc**.

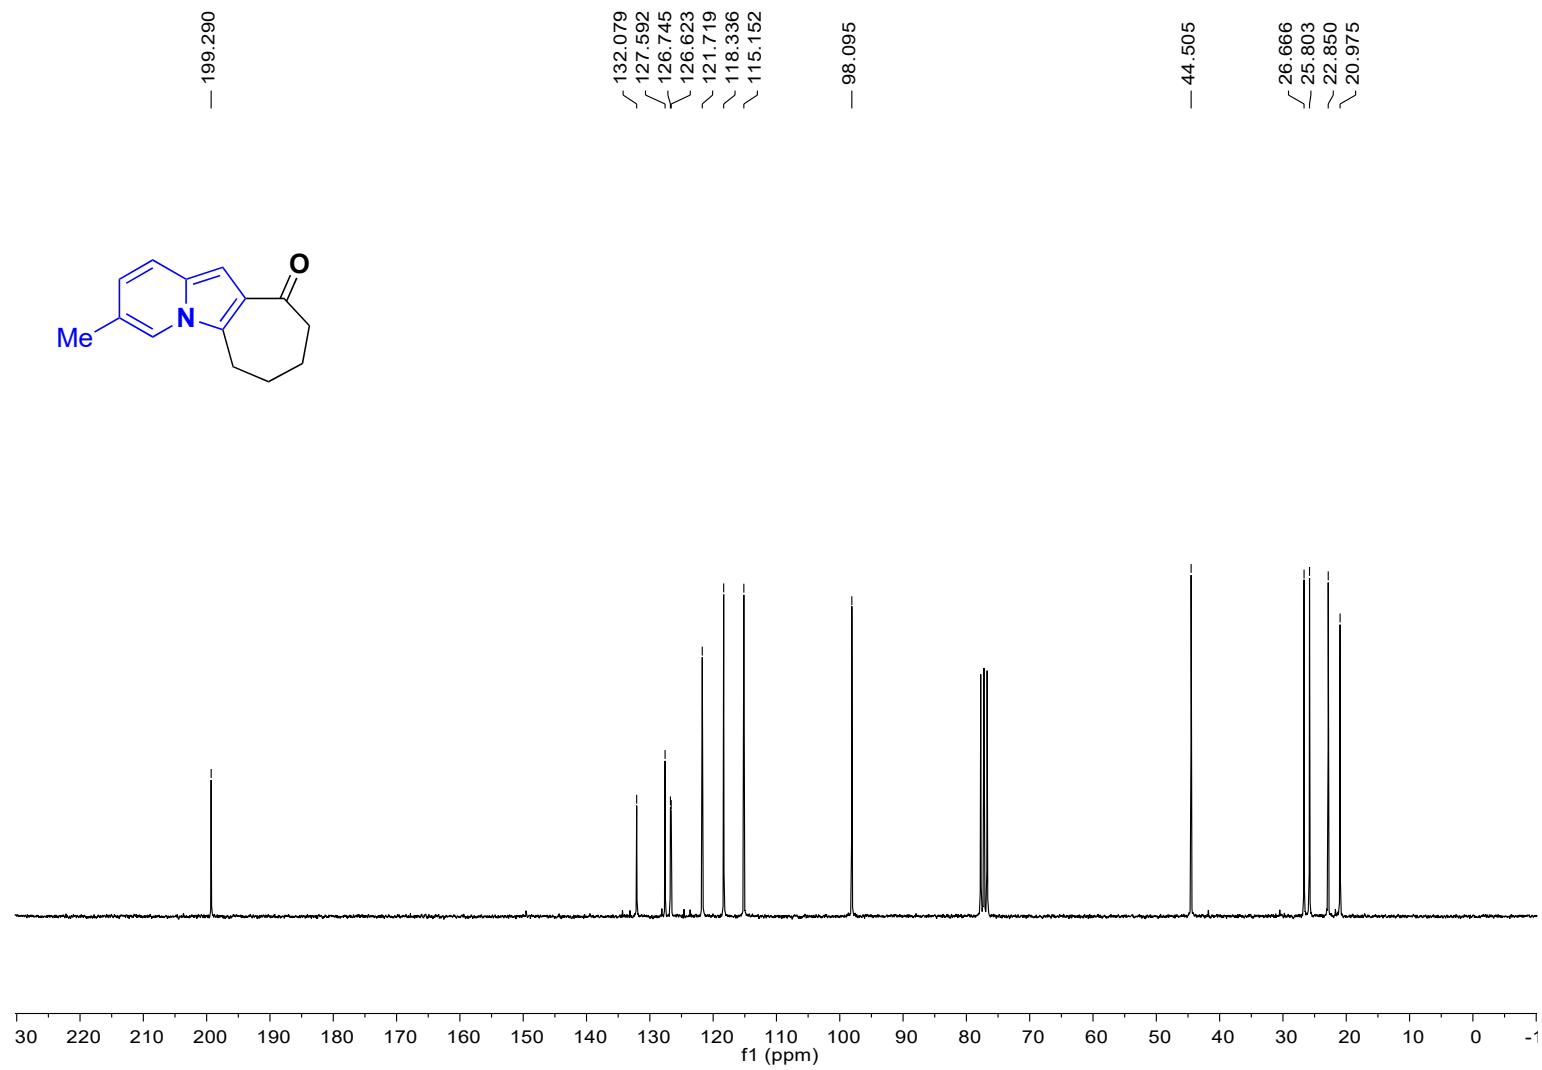

Figure S42. <sup>13</sup>C NMR spectrum (62.5 MHz, CDCl<sub>3</sub>) of compound 5dc.

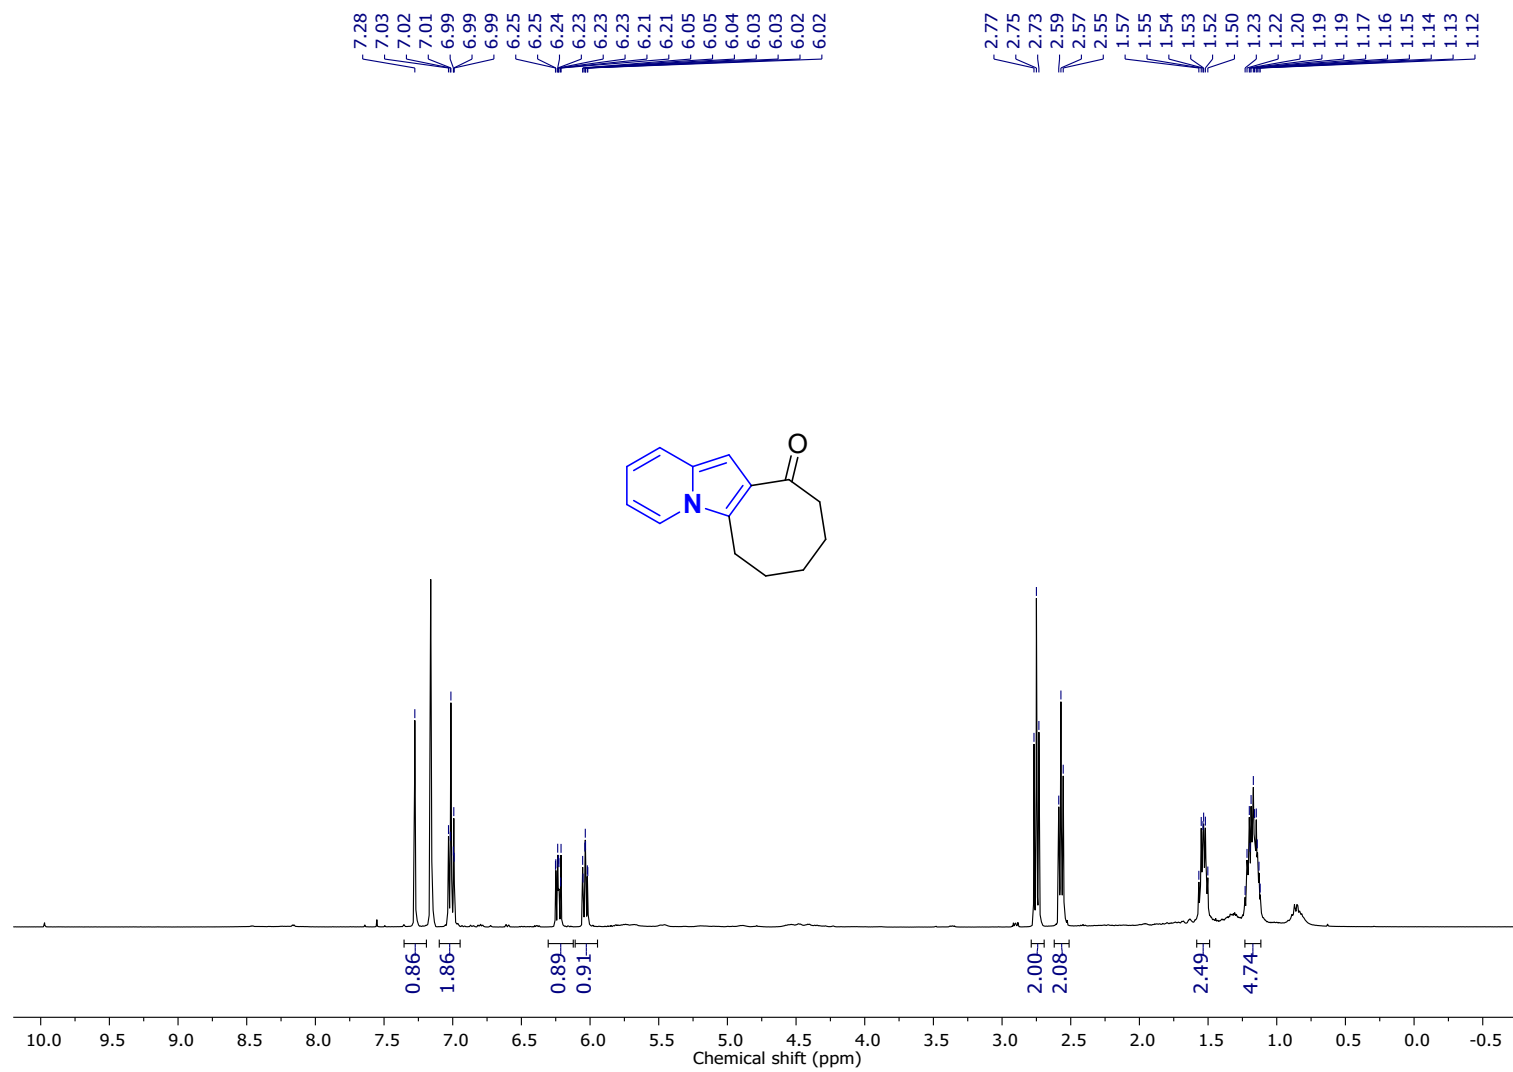

**Figure S43.** <sup>1</sup>H NMR spectrum (400 MHz, C<sub>6</sub>D<sub>6</sub>) of compound **5ag**.

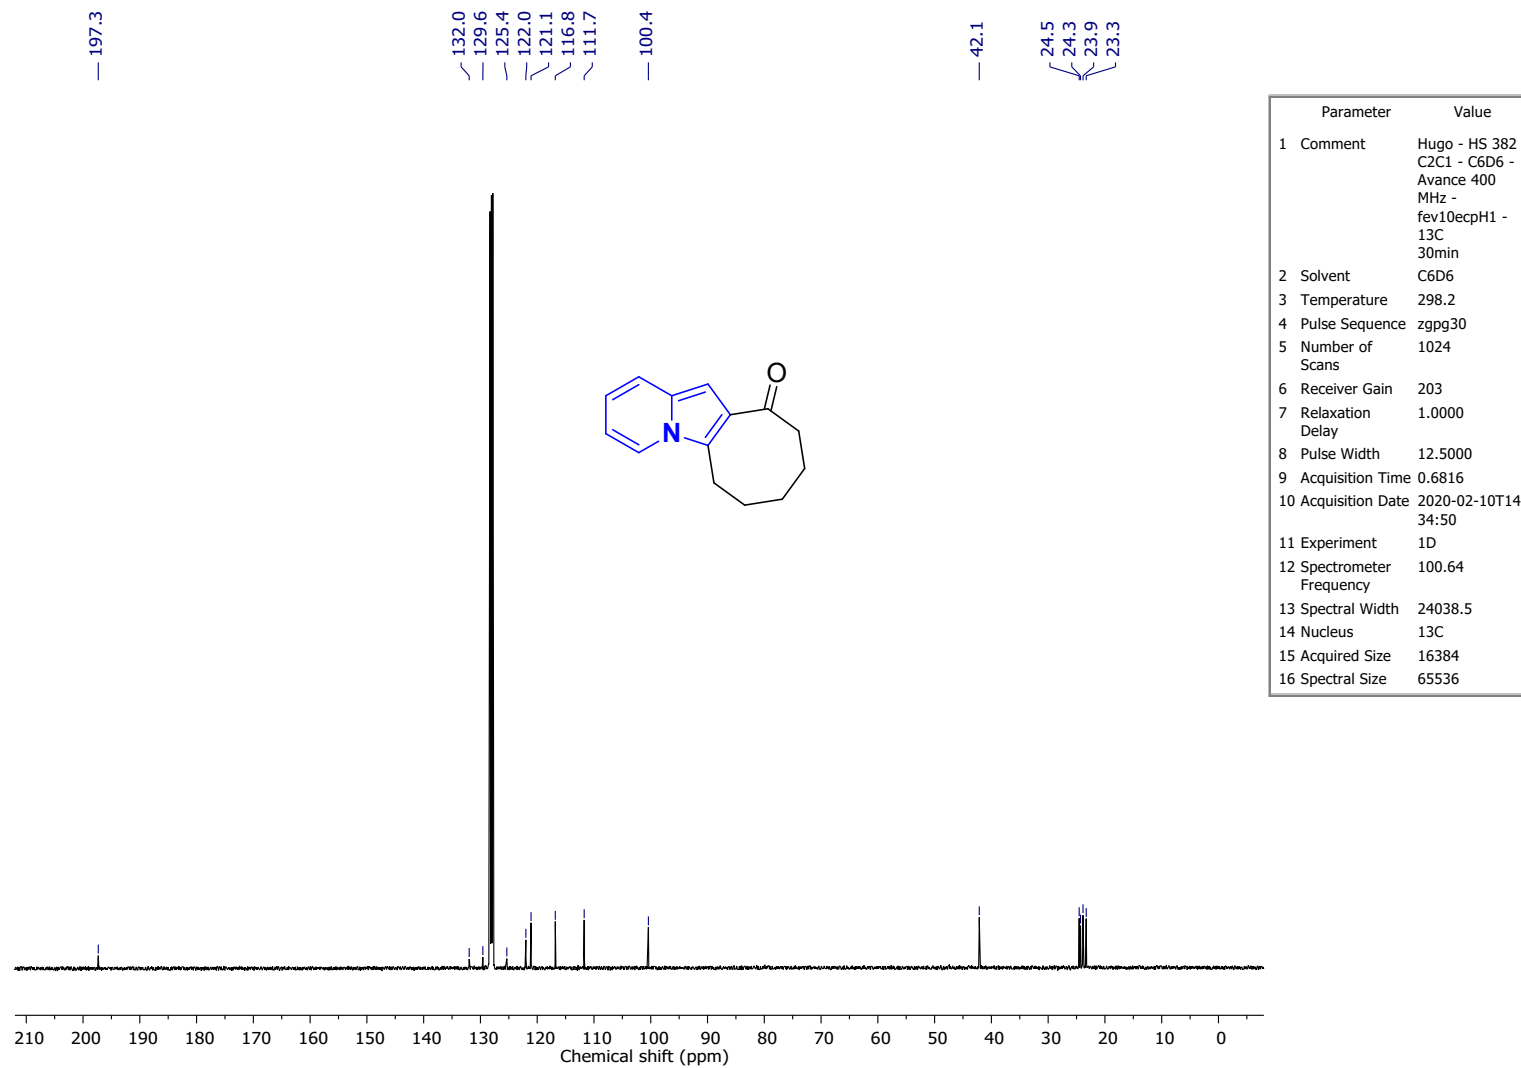

**Figure S44.**  $^{13}\text{C}$  NMR spectrum (101 MHz,  $\text{C}_6\text{D}_6$ ) of compound **5ag**.

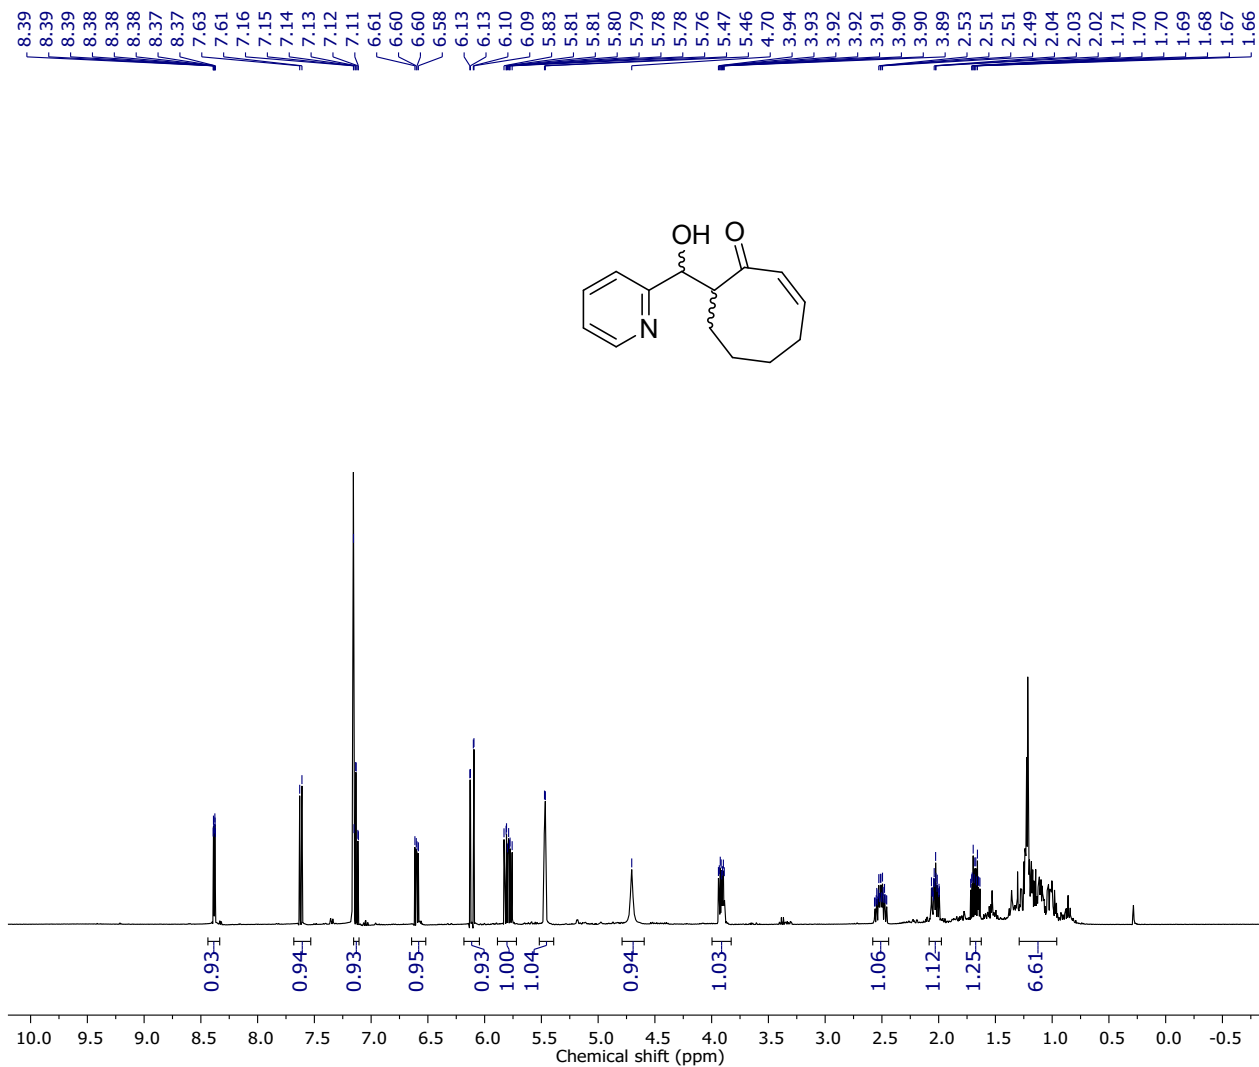

| Parameter                 | Value                                               |
|---------------------------|-----------------------------------------------------|
| 1 Comment                 | Hugo - HS-382-C3C1 - C6D6 - AV 400 MHz - fev13hdsH1 |
| 2 Solvent                 | C6D6                                                |
| 3 Temperature             | 298.2                                               |
| 4 Pulse Sequence          | zg30                                                |
| 5 Number of Scans         | 16                                                  |
| 6 Receiver Gain           | 57                                                  |
| 7 Relaxation Delay        | 1.0000                                              |
| 8 Pulse Width             | 8.5000                                              |
| 9 Acquisition Time        | 2.0447                                              |
| 10 Acquisition Date       | 2020-02-13T07:48:34                                 |
| 11 Experiment             | 1D                                                  |
| 12 Spectrometer Frequency | 400.18                                              |
| 13 Spectral Width         | 8012.8                                              |
| 14 Nucleus                | 1H                                                  |
| 15 Acquired Size          | 16384                                               |
| 16 Spectral Size          | 65536                                               |

Figure S45.  $^1\text{H}$  NMR spectrum (500 MHz,  $\text{C}_6\text{D}_6$ ) of compound **6ag** (major).

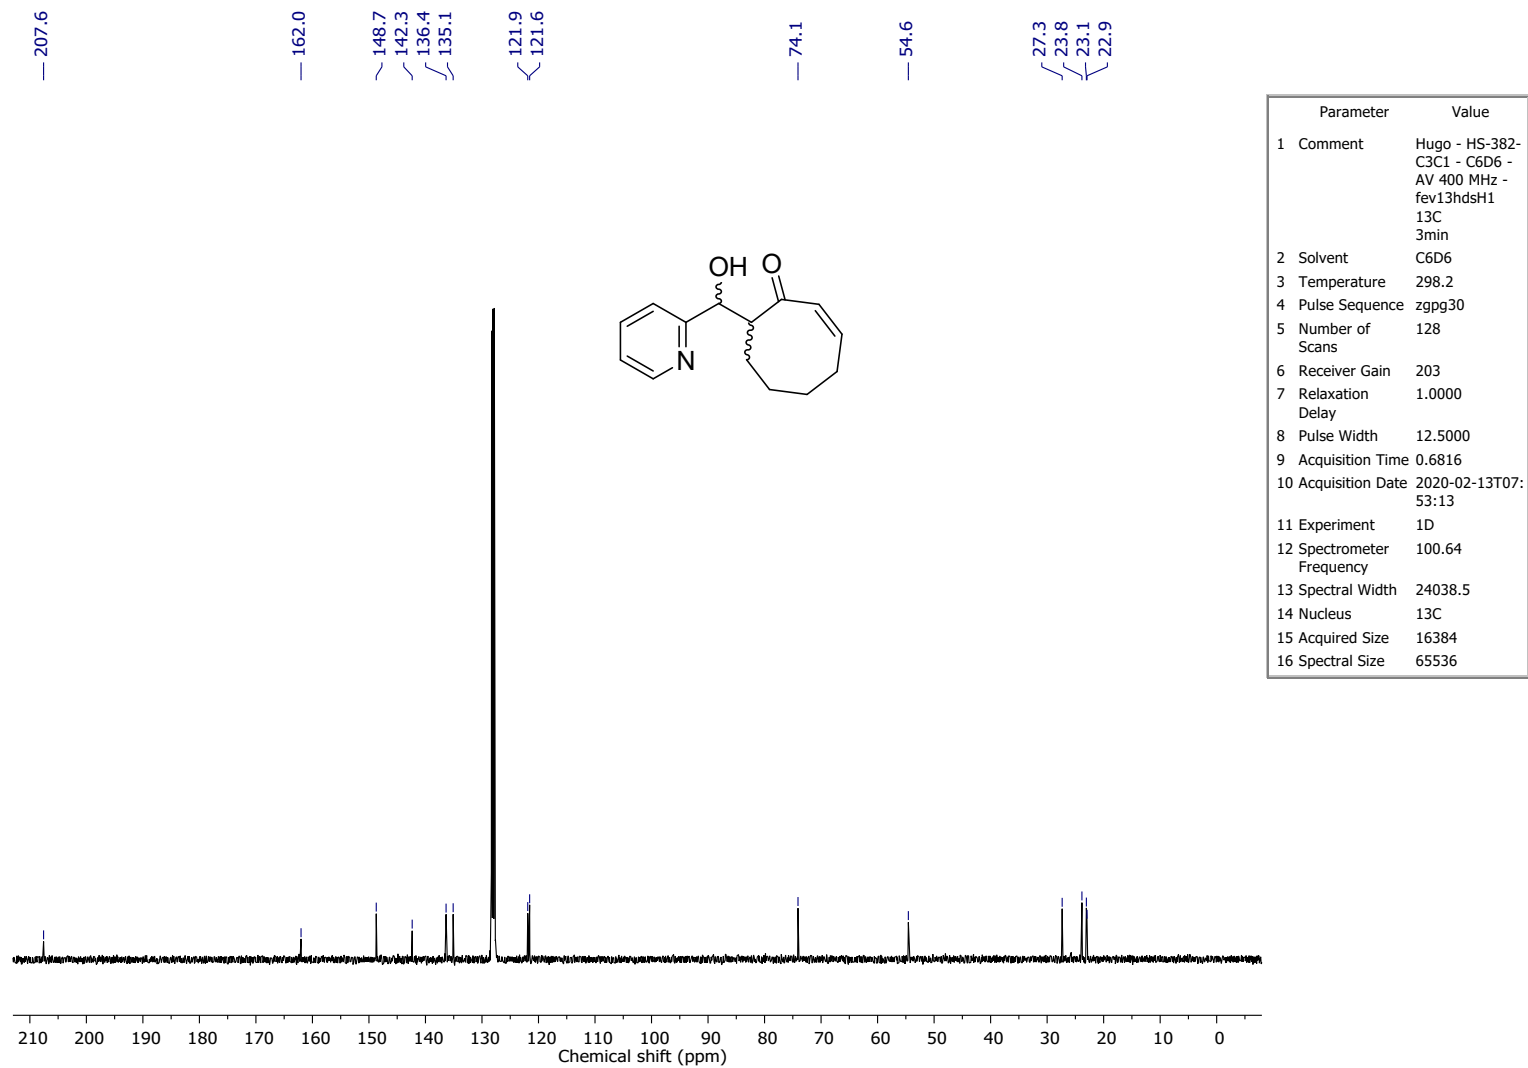

**Figure S46.**  $^{13}\text{C}$  NMR spectrum (101 MHz,  $\text{C}_6\text{D}_6$ ) of compound **6ag** (major).



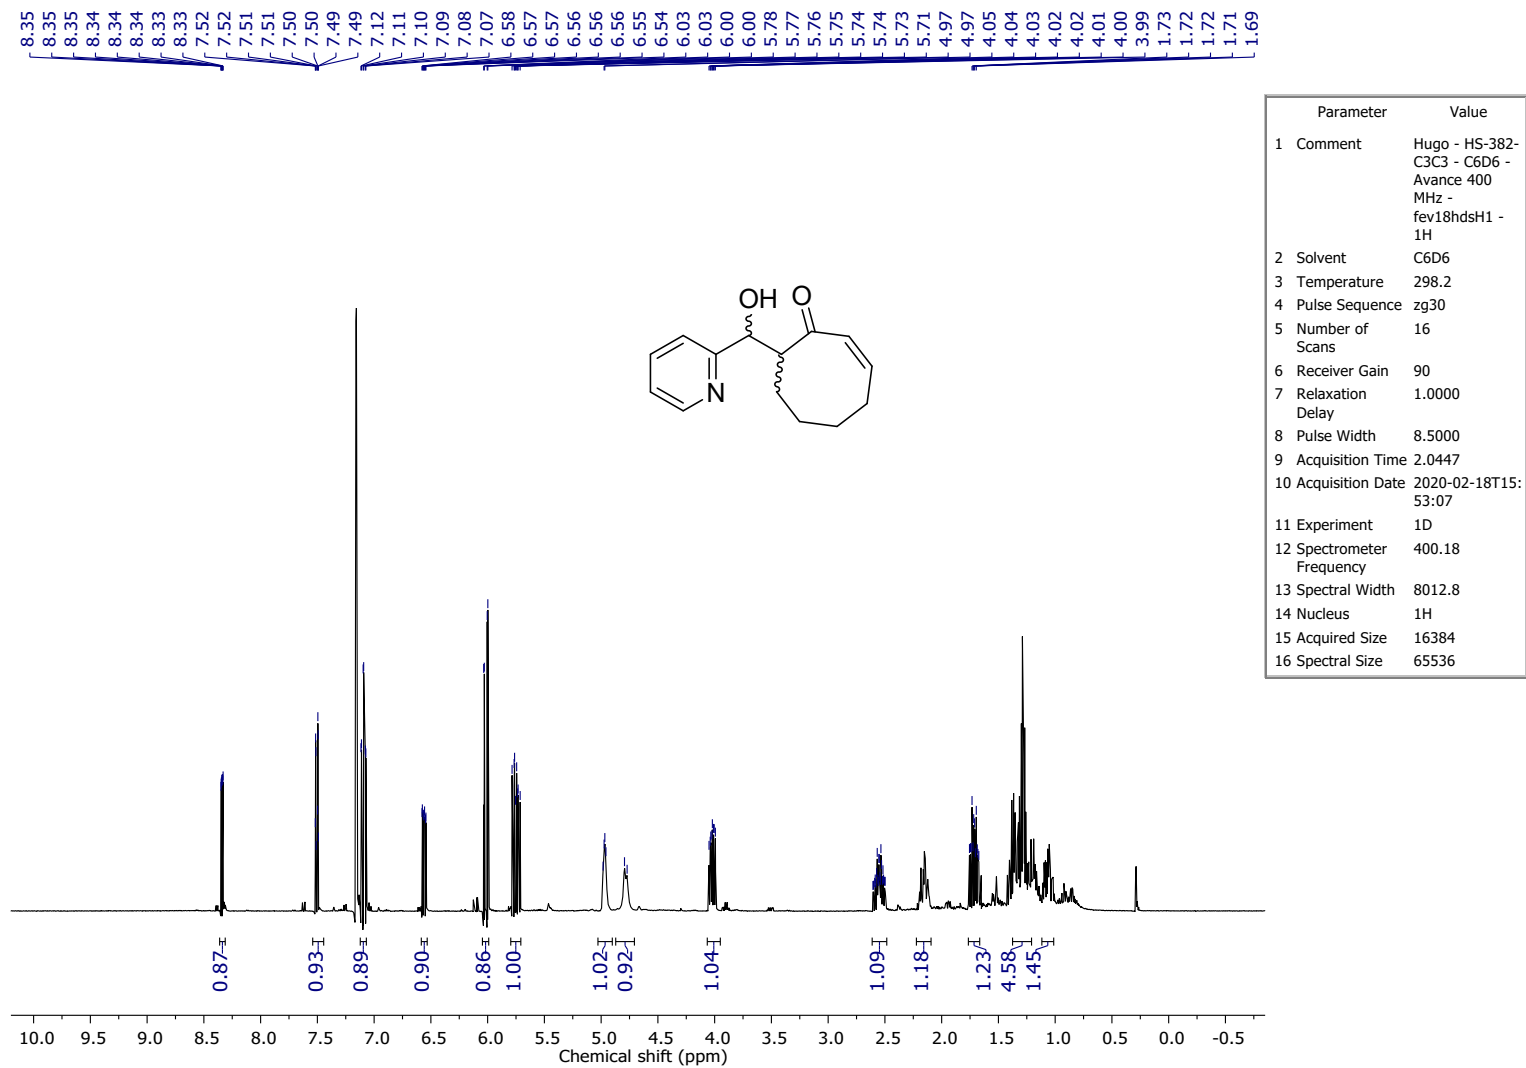

Figure S47. <sup>1</sup>H NMR spectrum (500 MHz, C<sub>6</sub>D<sub>6</sub>) of compound **6ag** (minor).

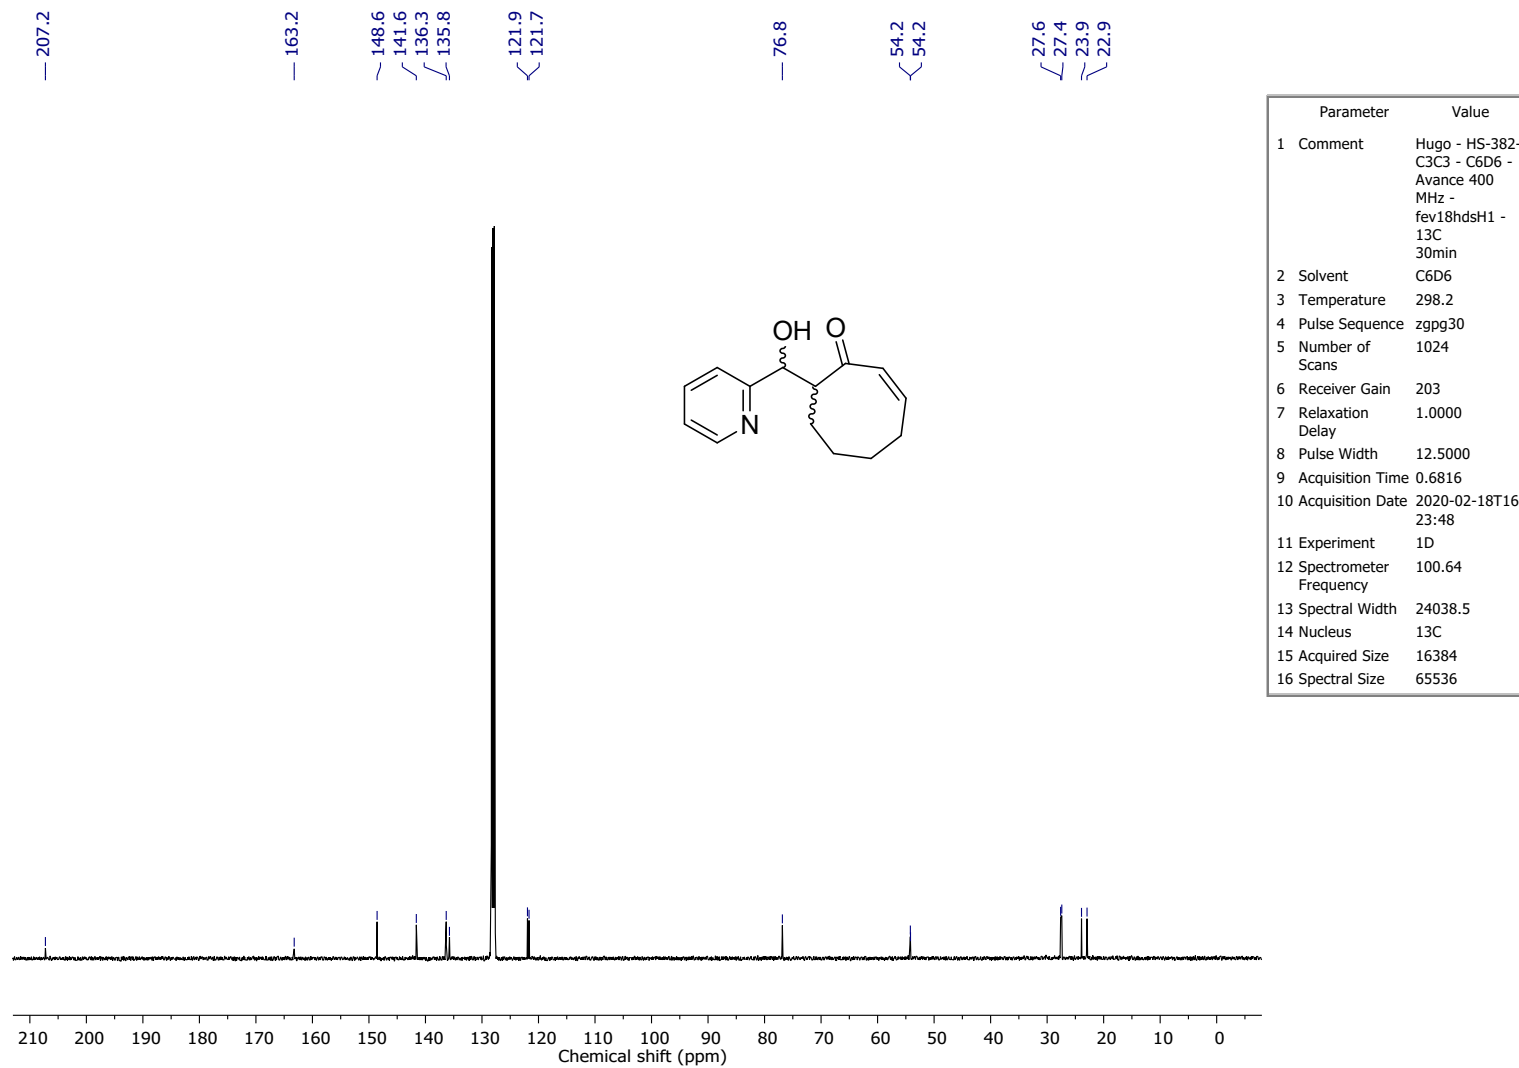

**Figure S48.** <sup>13</sup>C NMR spectrum (101 MHz, C<sub>6</sub>D<sub>6</sub>) of compound **6ag** (minor).

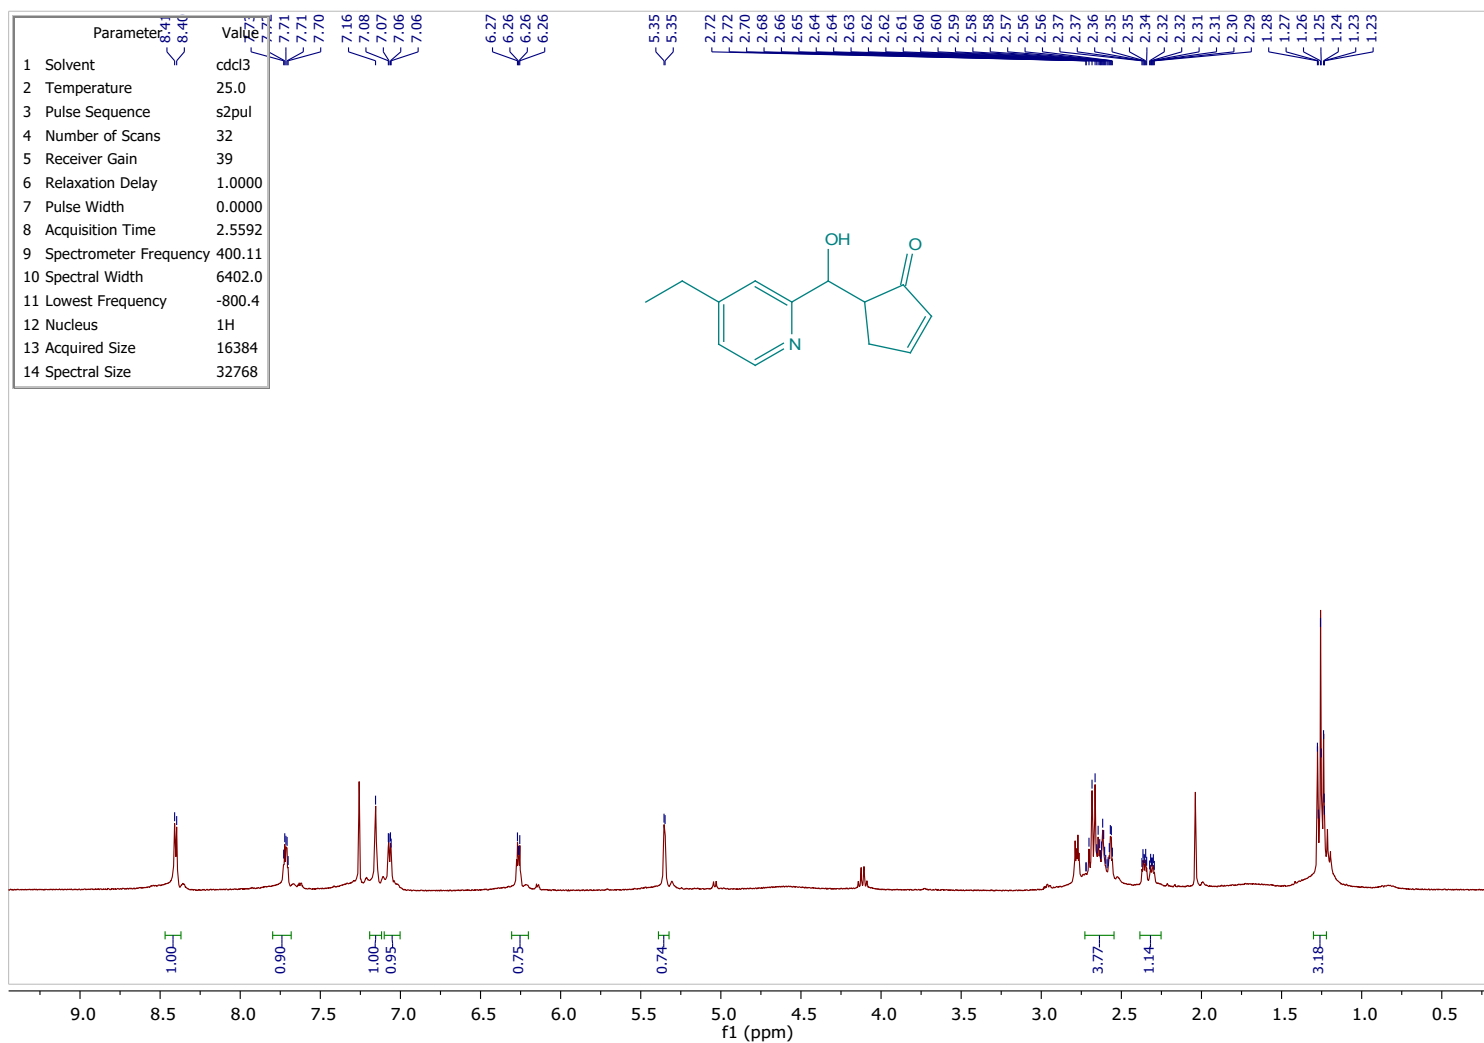

**Figure S49.** <sup>1</sup>H NMR spectrum (400 MHz, CDCl<sub>3</sub>) of compound **6eb**.

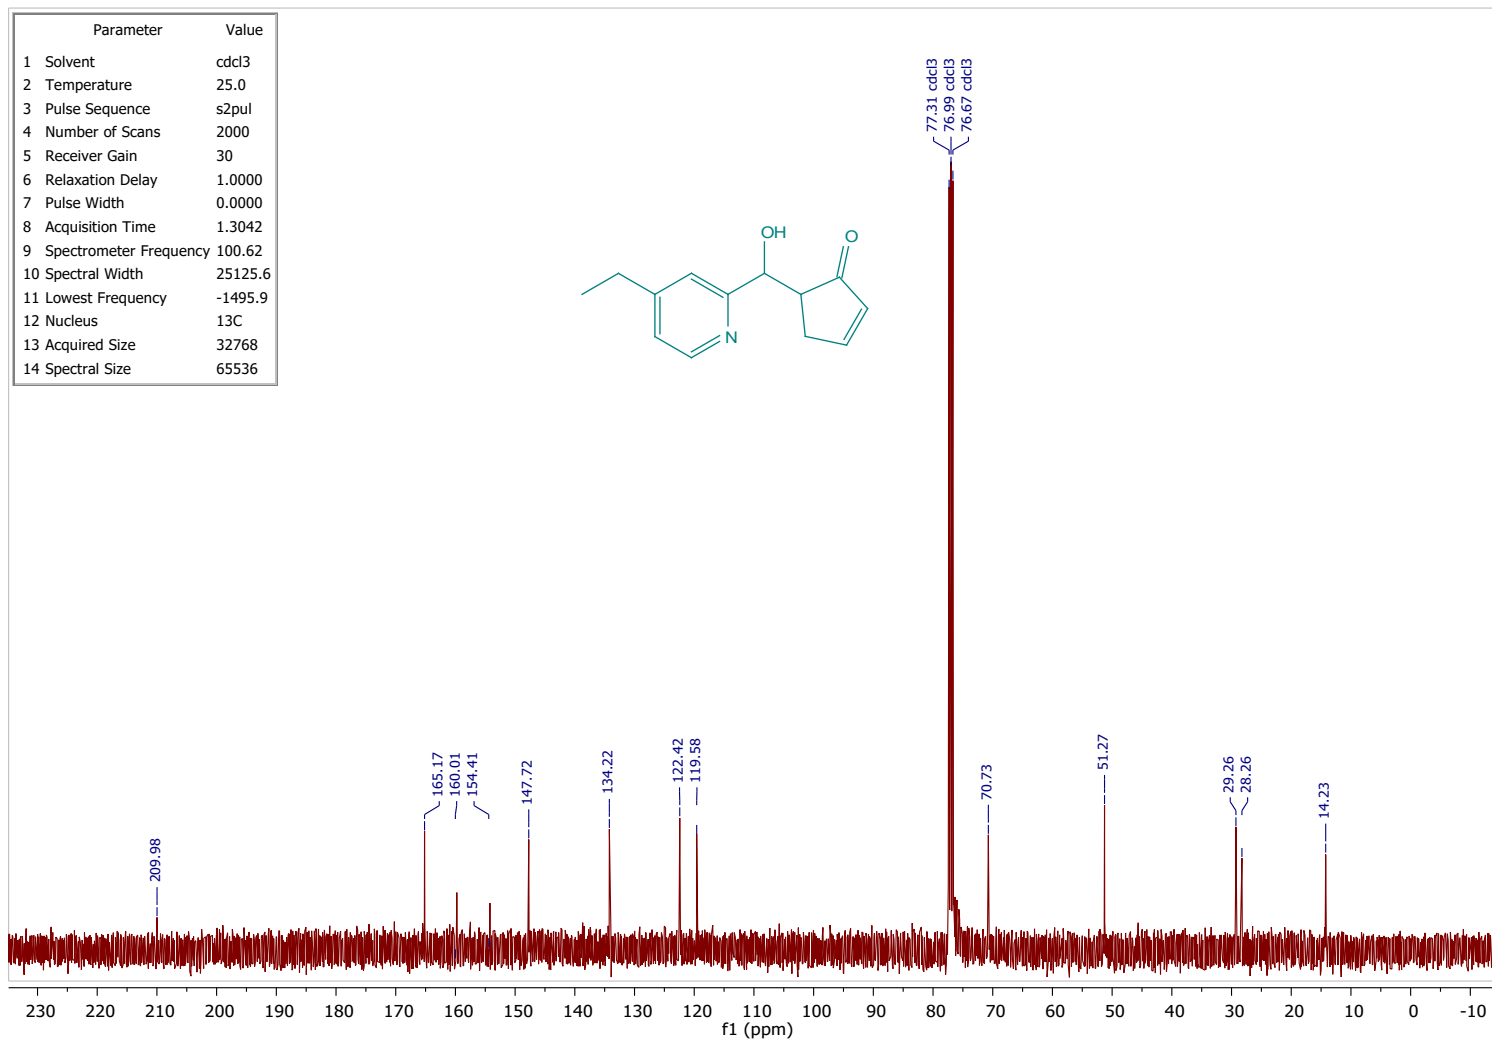

**Figure S50.**  $^{13}\text{C}$  NMR spectrum (101 MHz,  $\text{CDCl}_3$ ) of compound **6eb**.

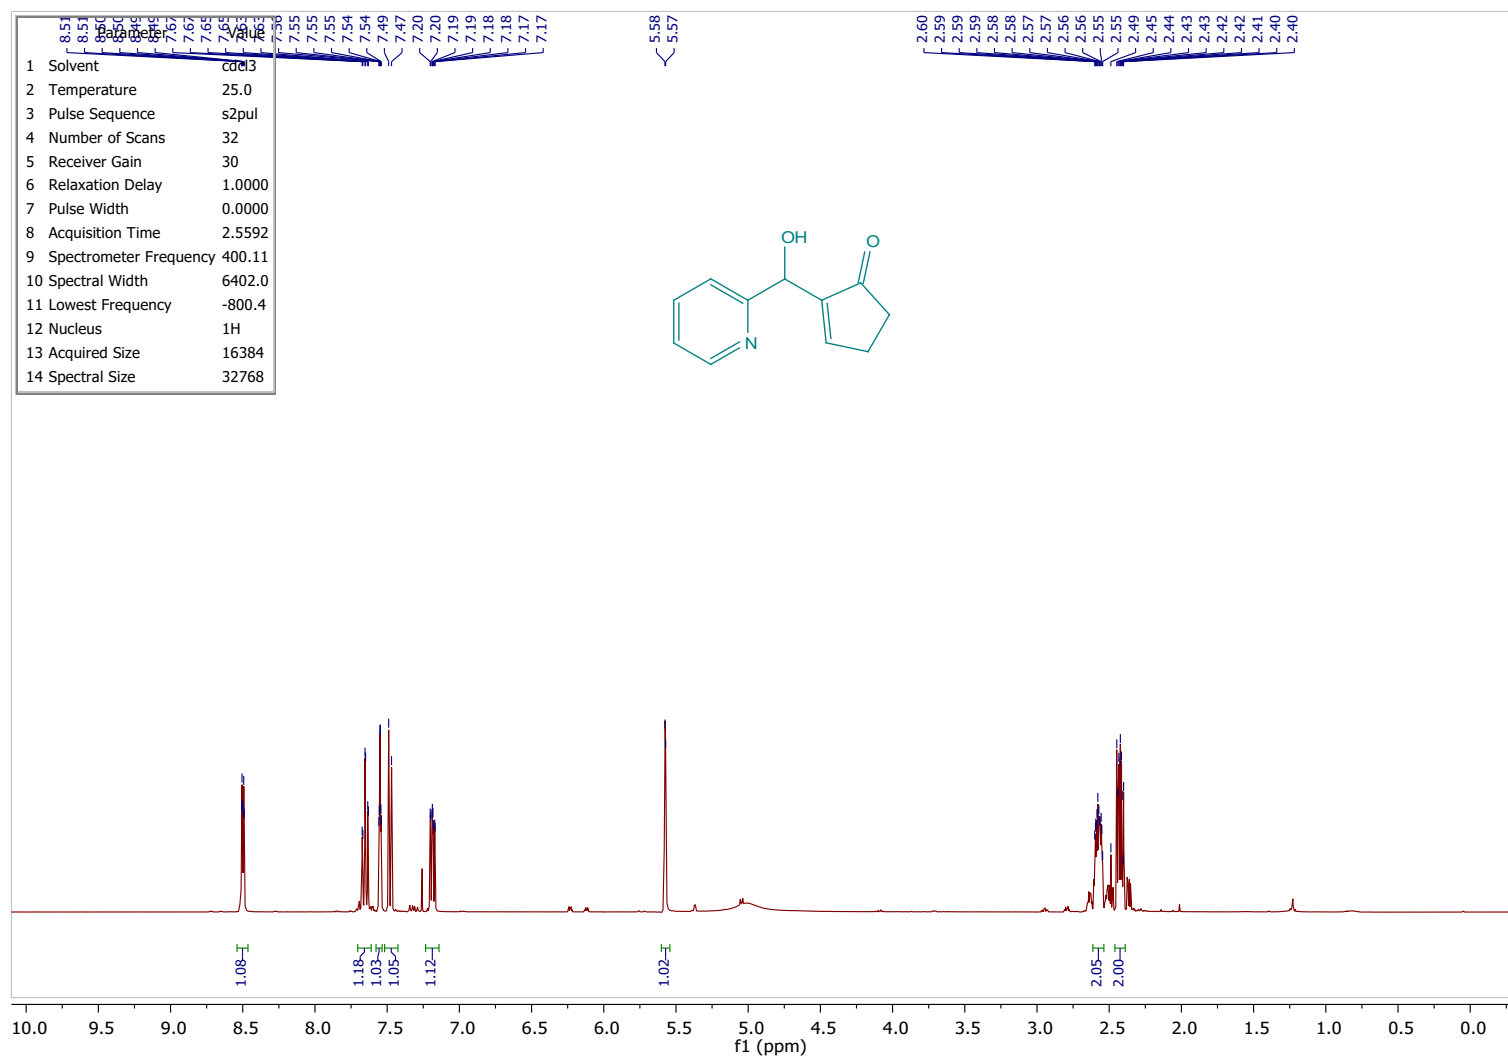

**Figure S51.**  $^1\text{H}$  NMR spectrum (400 MHz,  $\text{CDCl}_3$ ) of compound **4ab**.

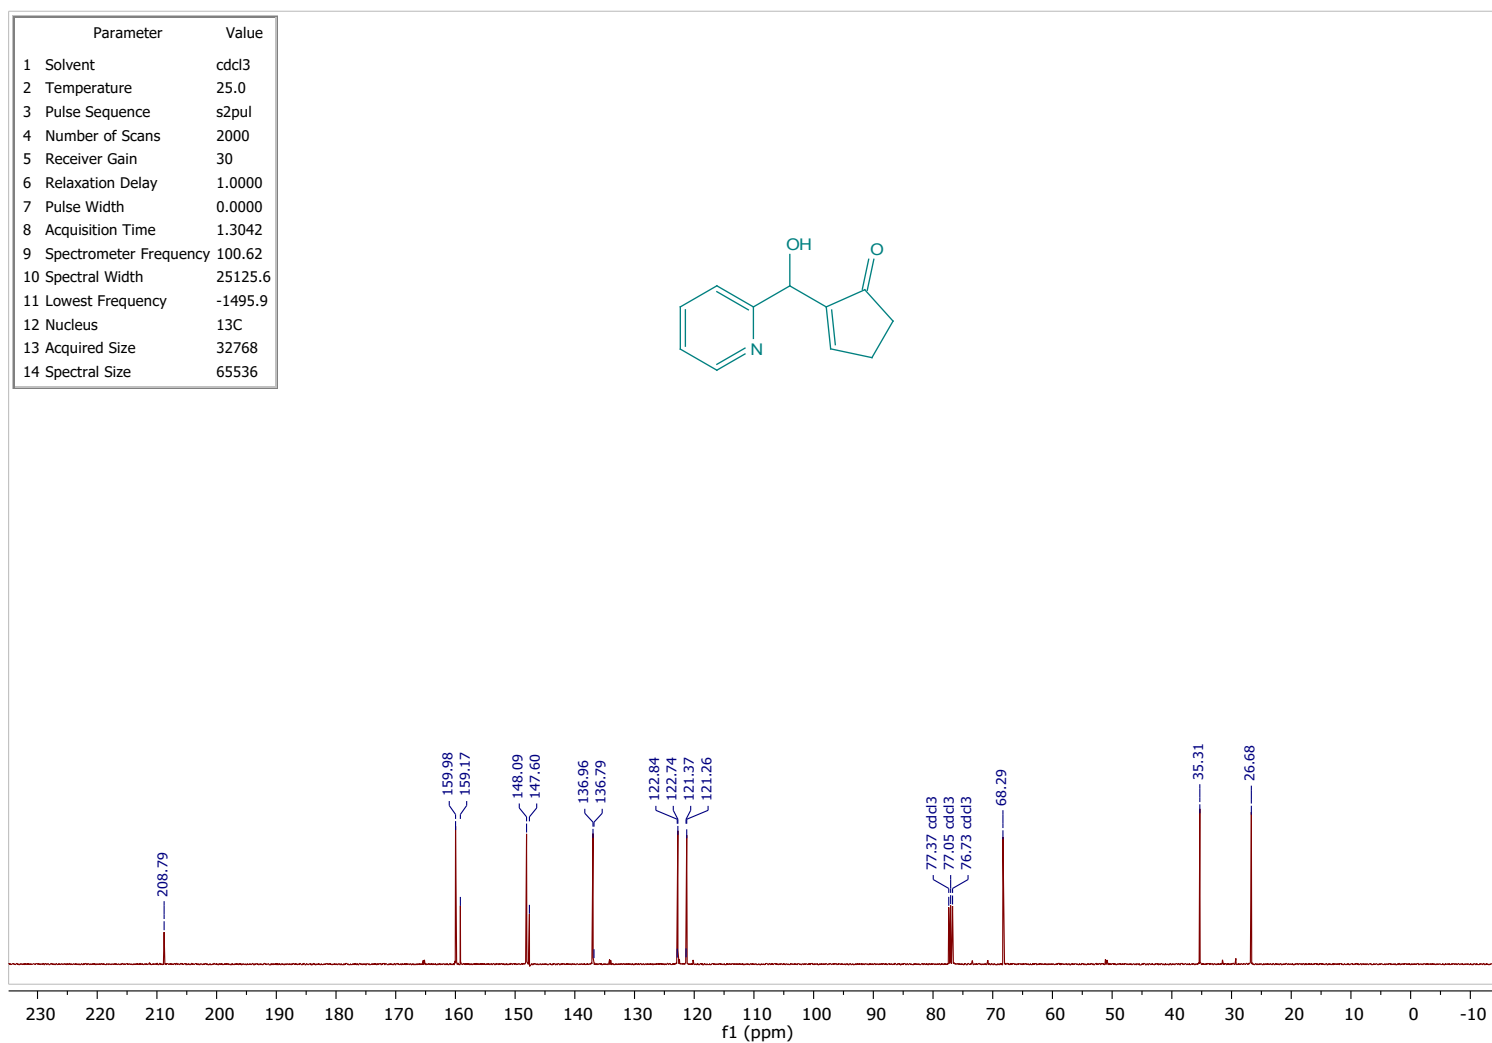

Figure S52.  $^{13}\text{C}$  NMR spectrum (101 MHz,  $\text{CDCl}_3$ ) of compound **4ab**.

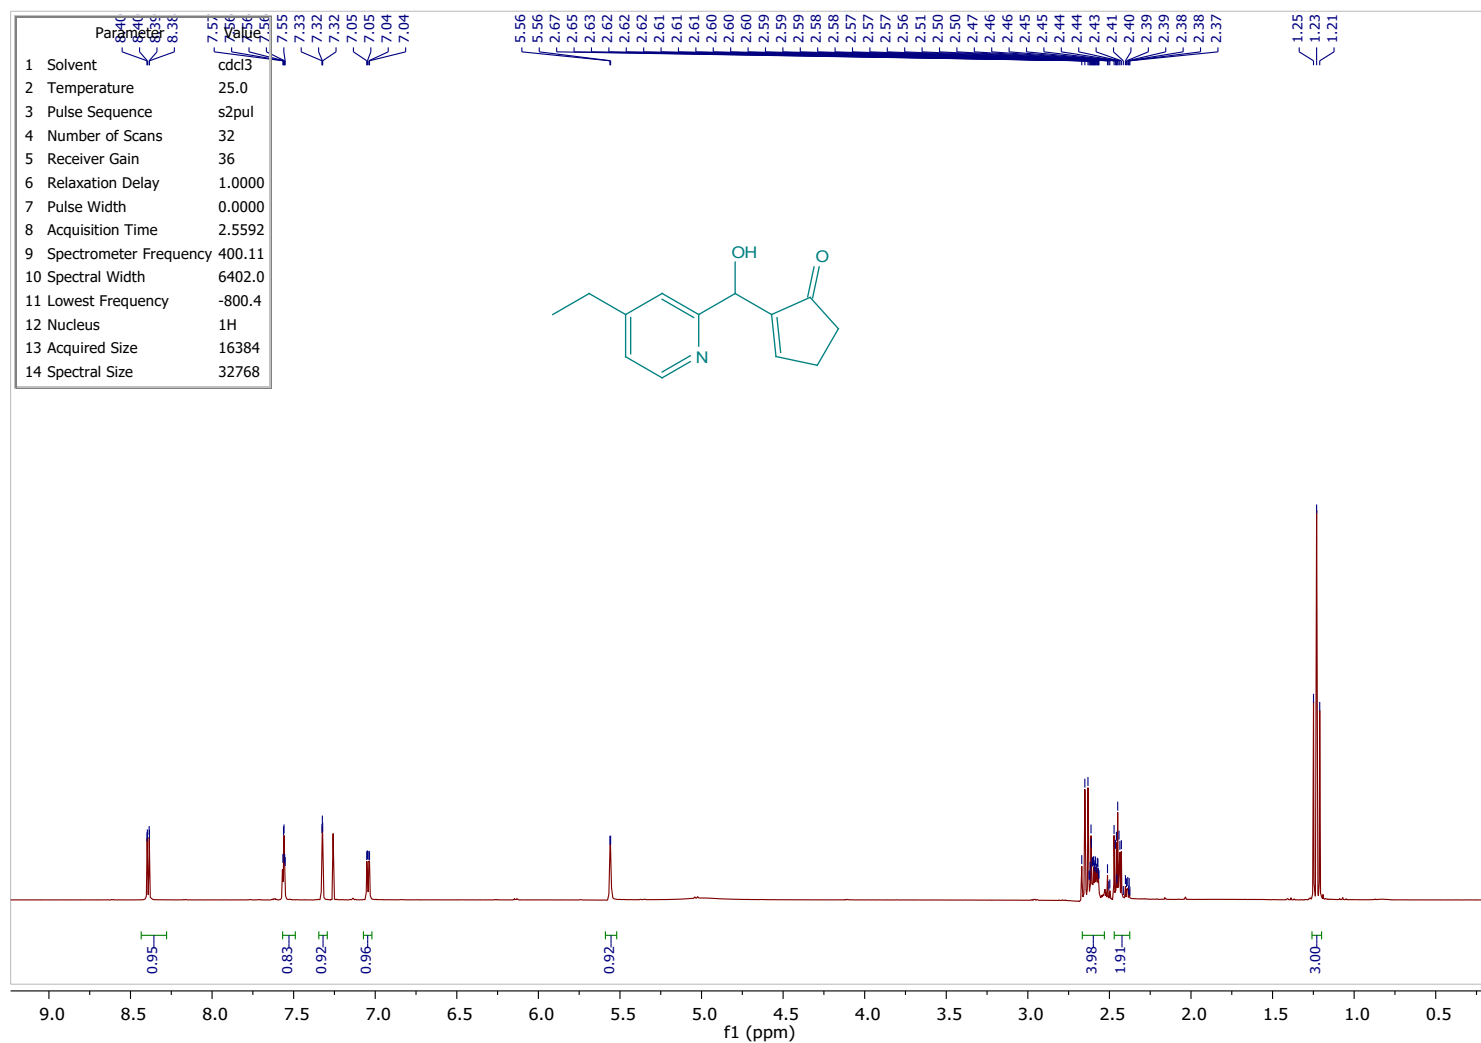

**Figure S53.** <sup>1</sup>H NMR spectrum (400 MHz, CDCl<sub>3</sub>) of compound **4eb**.

M400AQ\_01122015\_LVA35b-C13  
M400Q / Num.Inv. AF/004285  
cdcl3 / Temp: 25°C / N.Reg: XXXXXXXXXXXX  
Usuari: bart / Mosq: LVA35b  
Nom: AITOR ARLEGUI CHAMIZO  
Data: 30/11/15 / Ope.: A.ARLEGUI

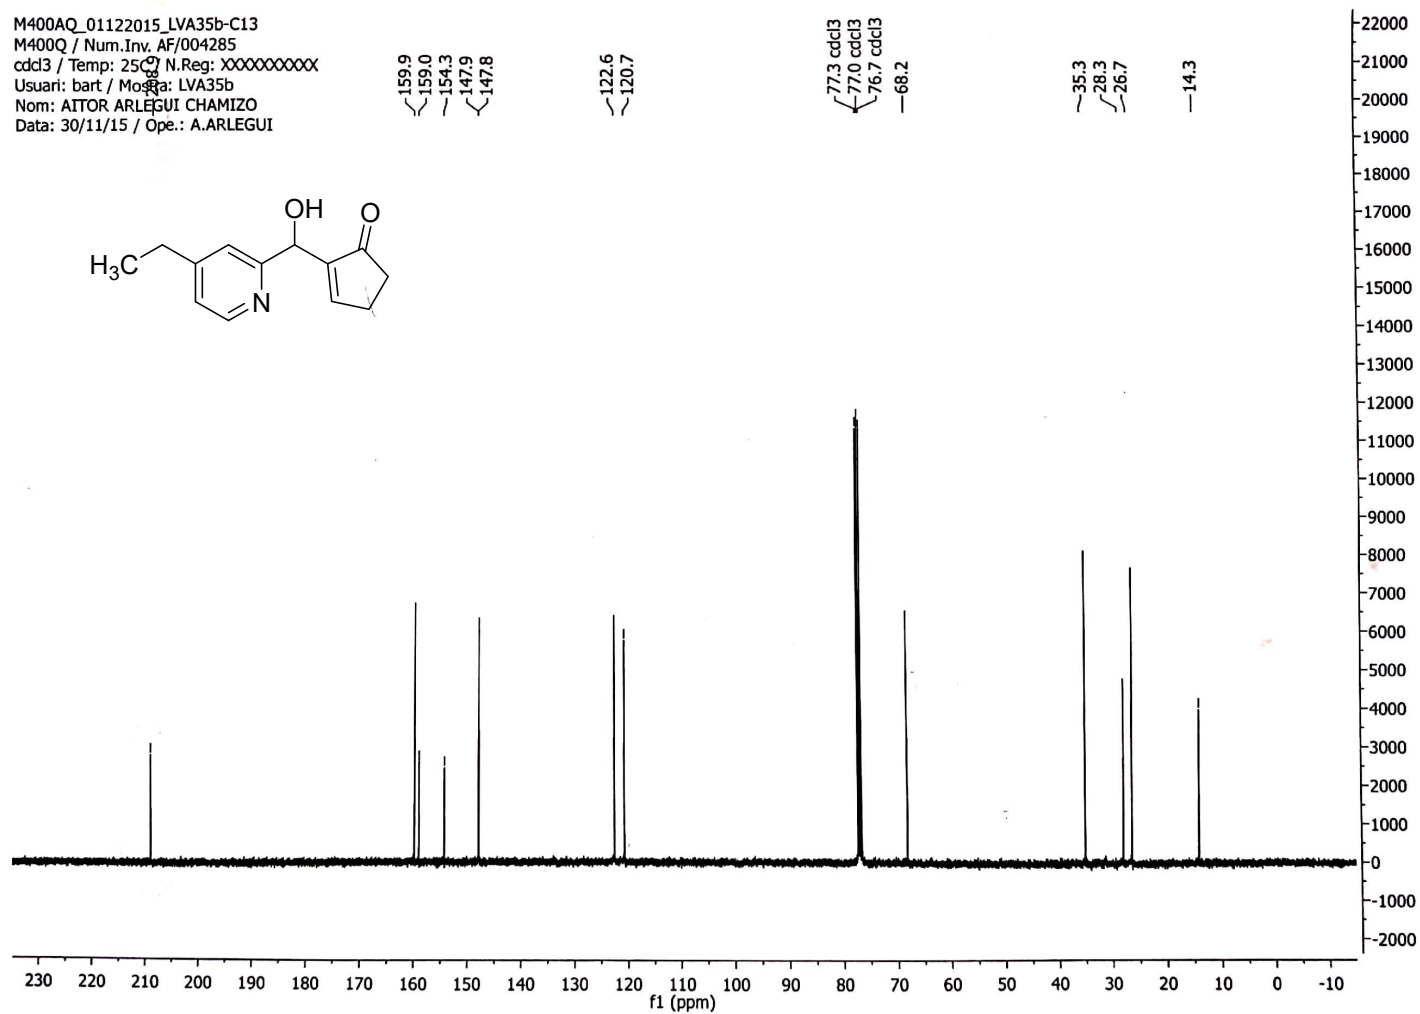

Figure S54.  $^{13}\text{C}$  NMR spectrum (101 MHz,  $\text{CDCl}_3$ ) of compound 4eb



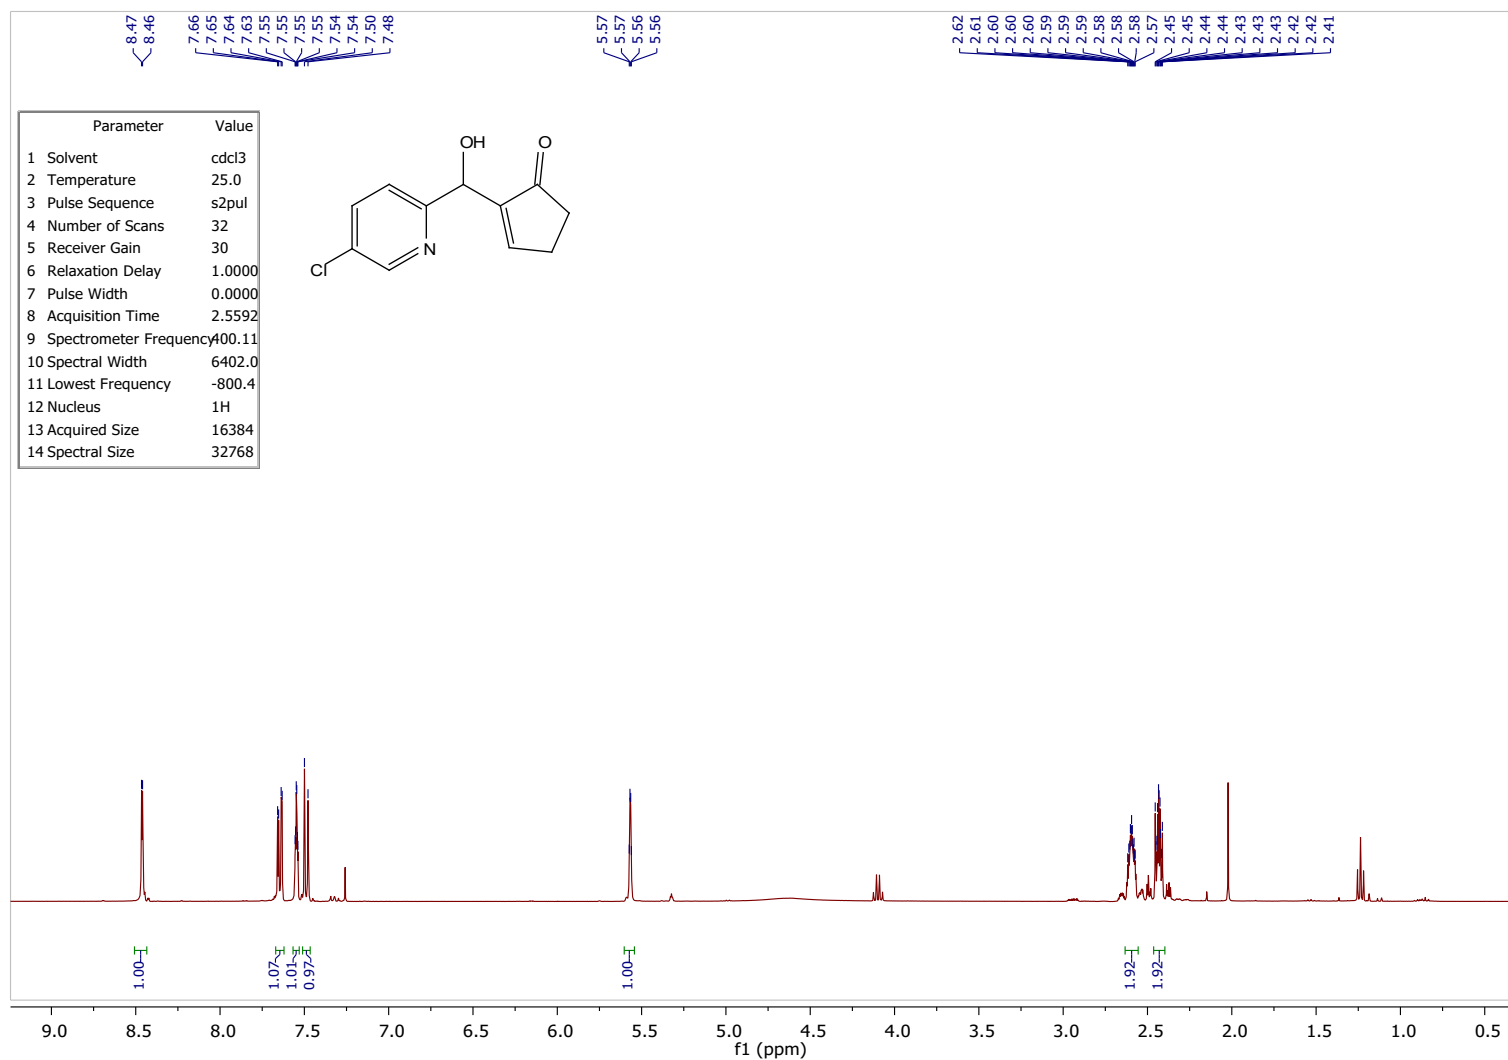

**Figure S55.**  $^1\text{H}$  NMR spectrum (400 MHz,  $\text{CDCl}_3$ ) of compound **4gb**.

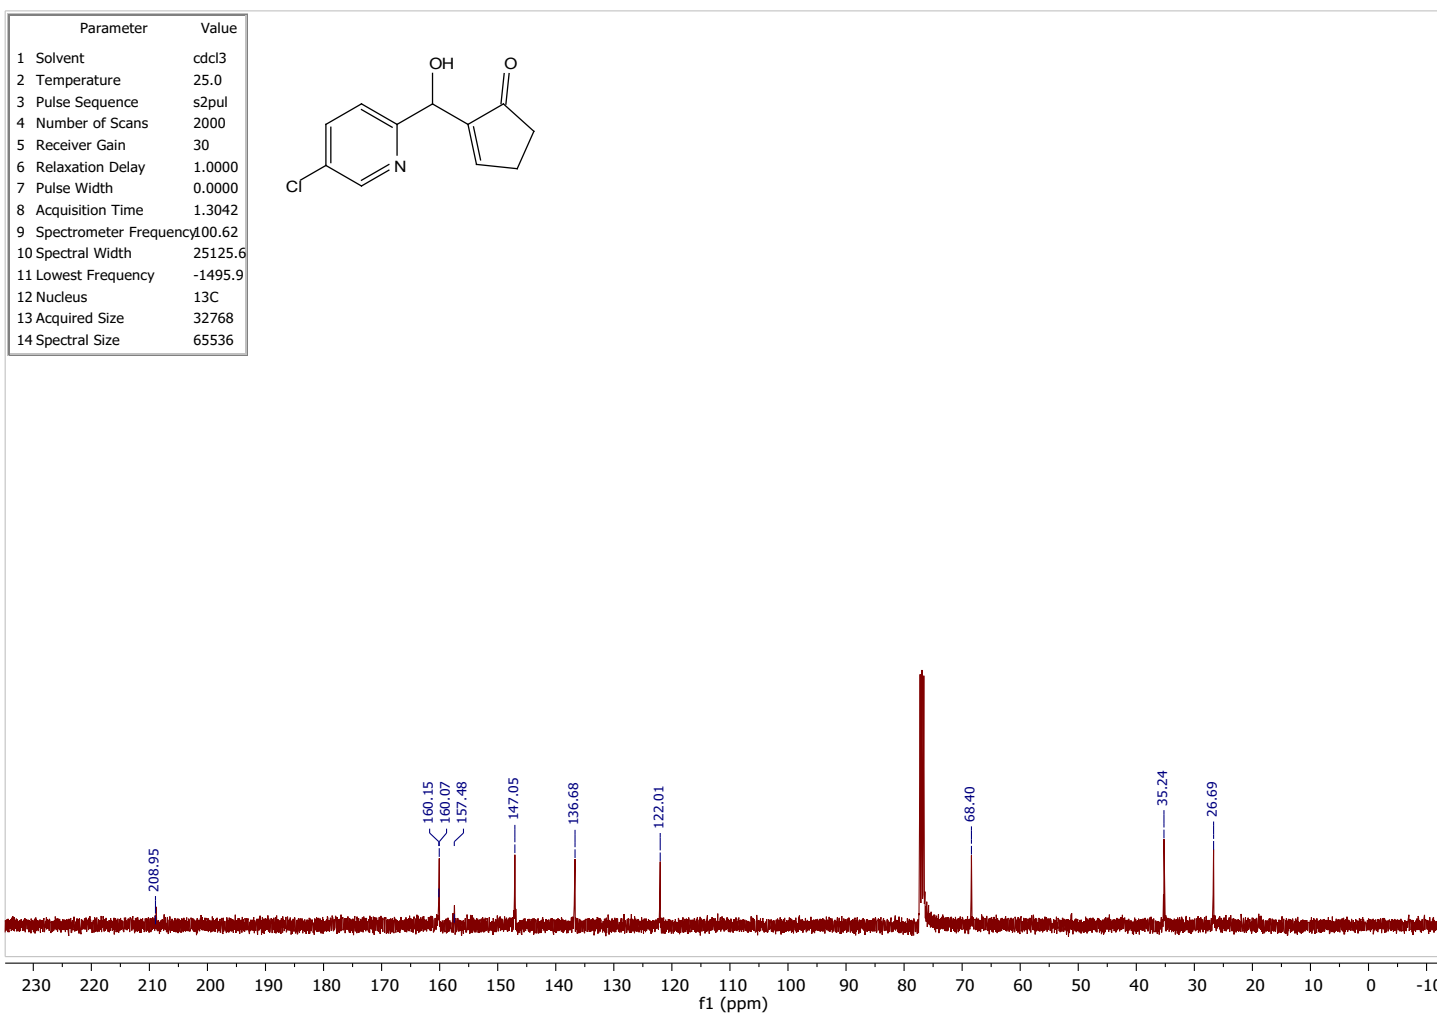

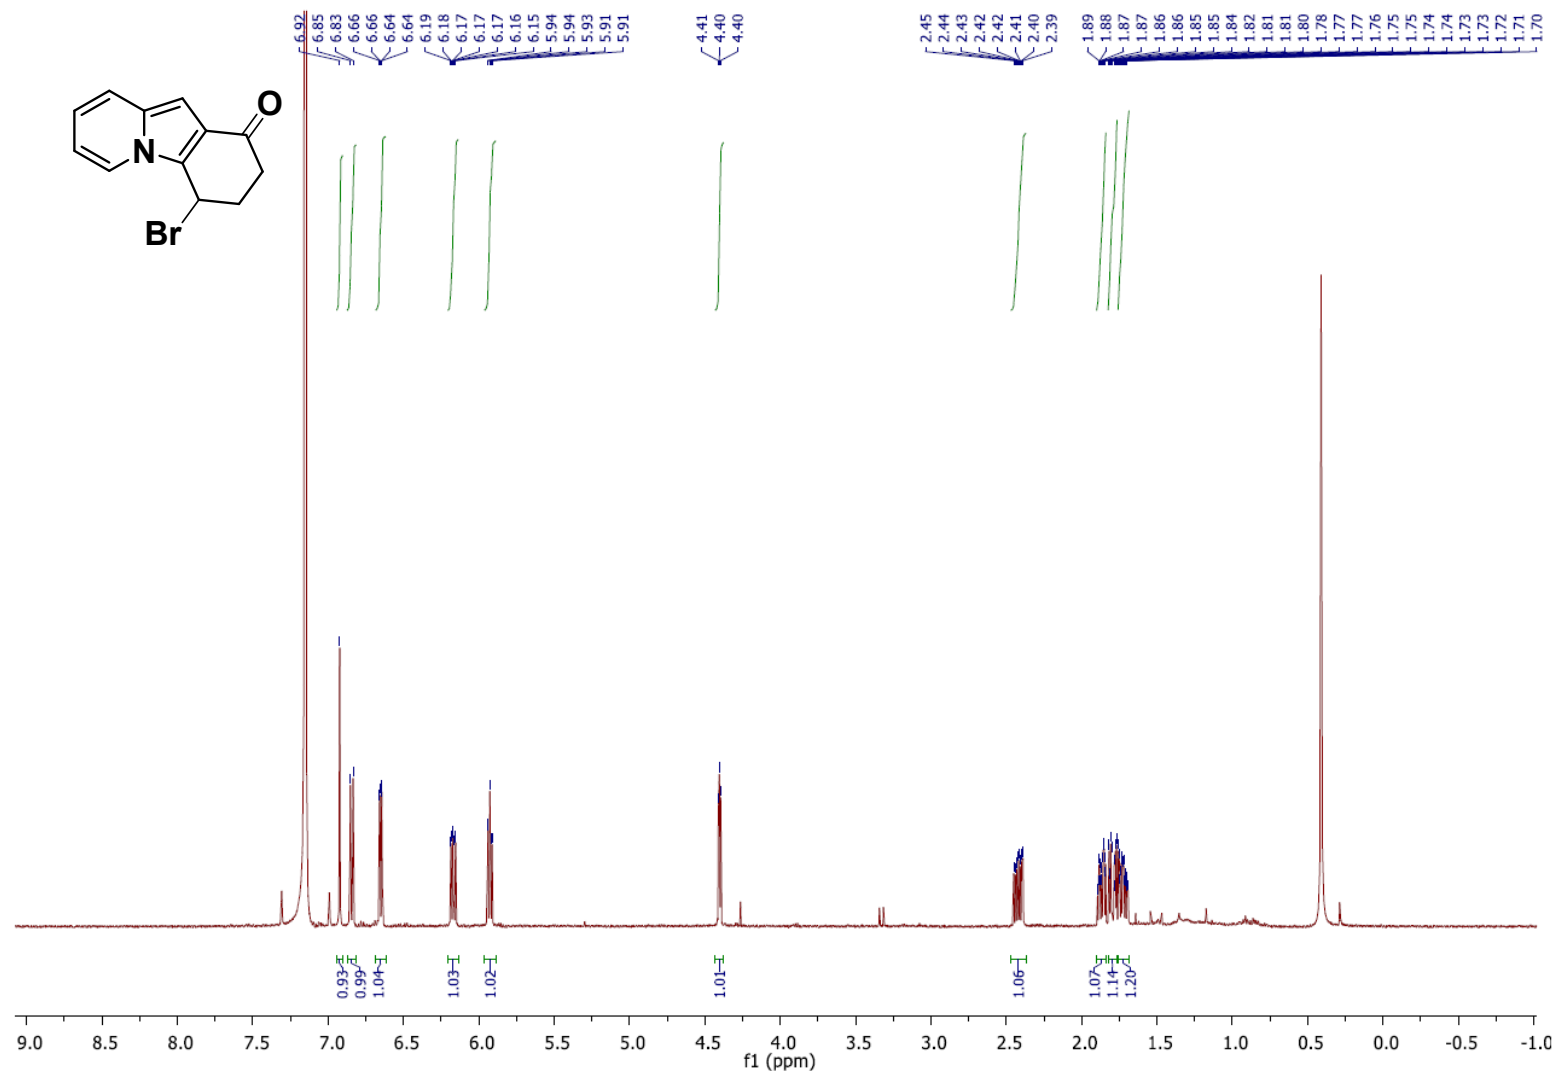

Figure S57. <sup>1</sup>H NMR spectrum (500 MHz, C<sub>6</sub>D<sub>6</sub>) of compound 7.

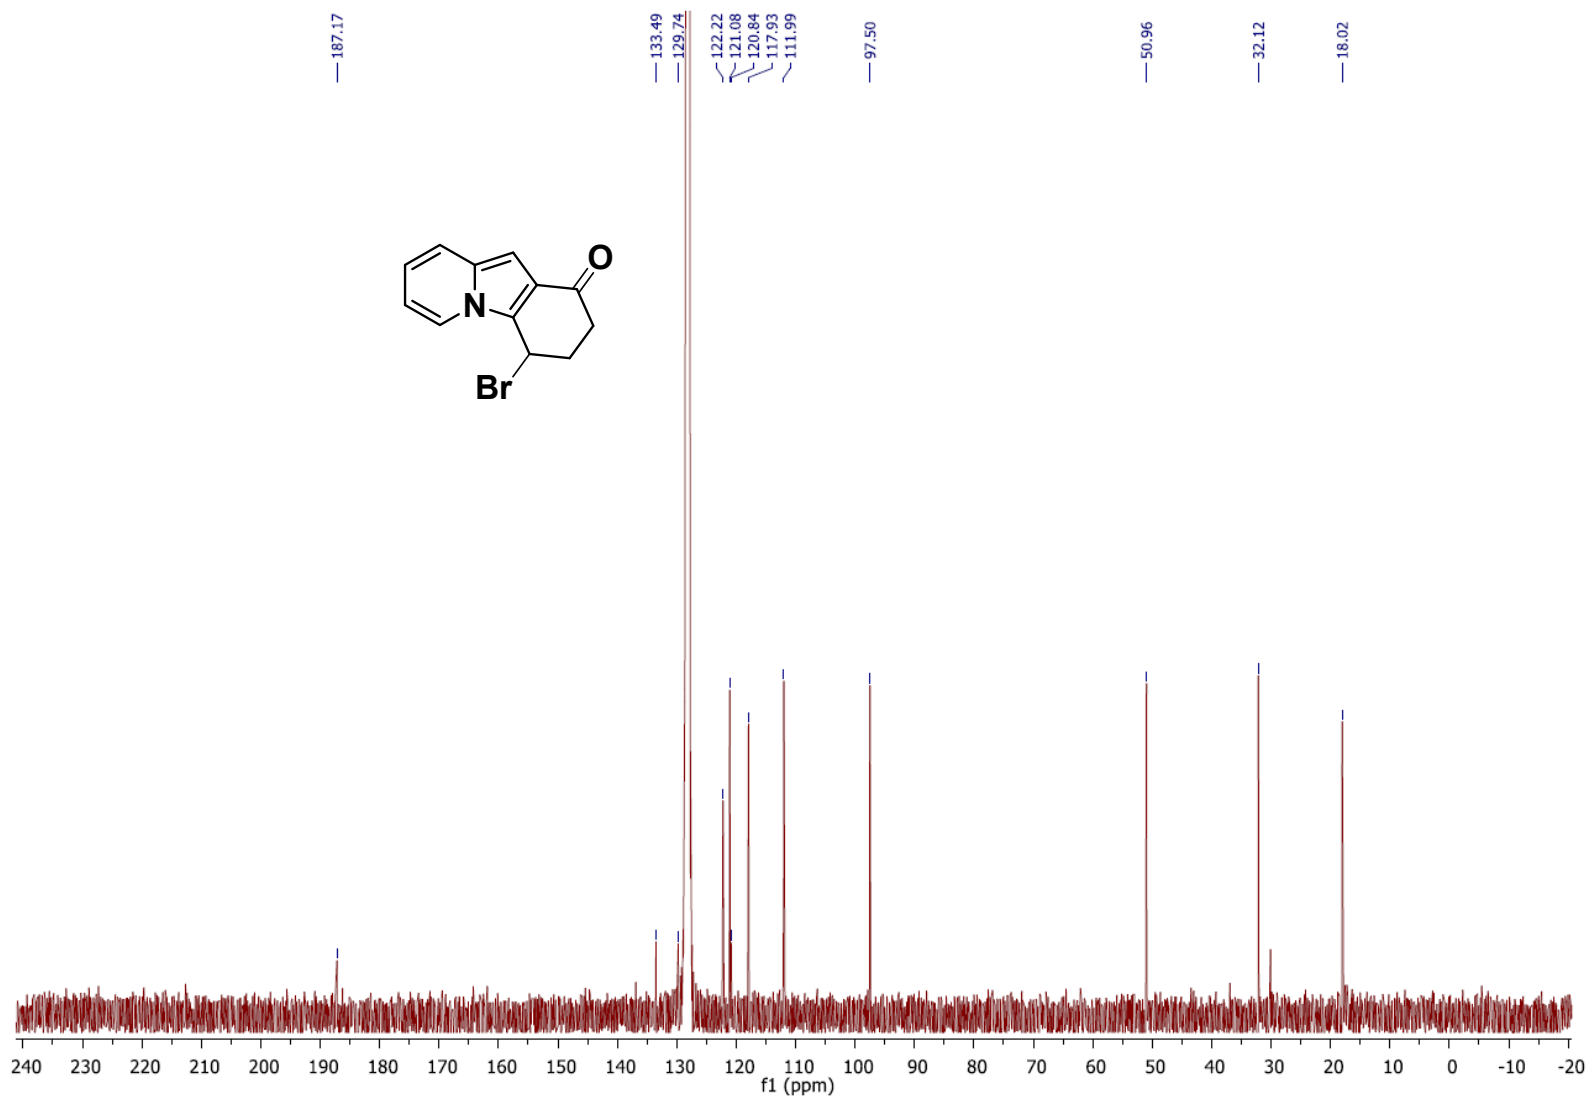

Figure S58.  $^{13}\text{C}$  NMR spectrum (151 MHz,  $\text{C}_6\text{D}_6$ ) of compound 7.

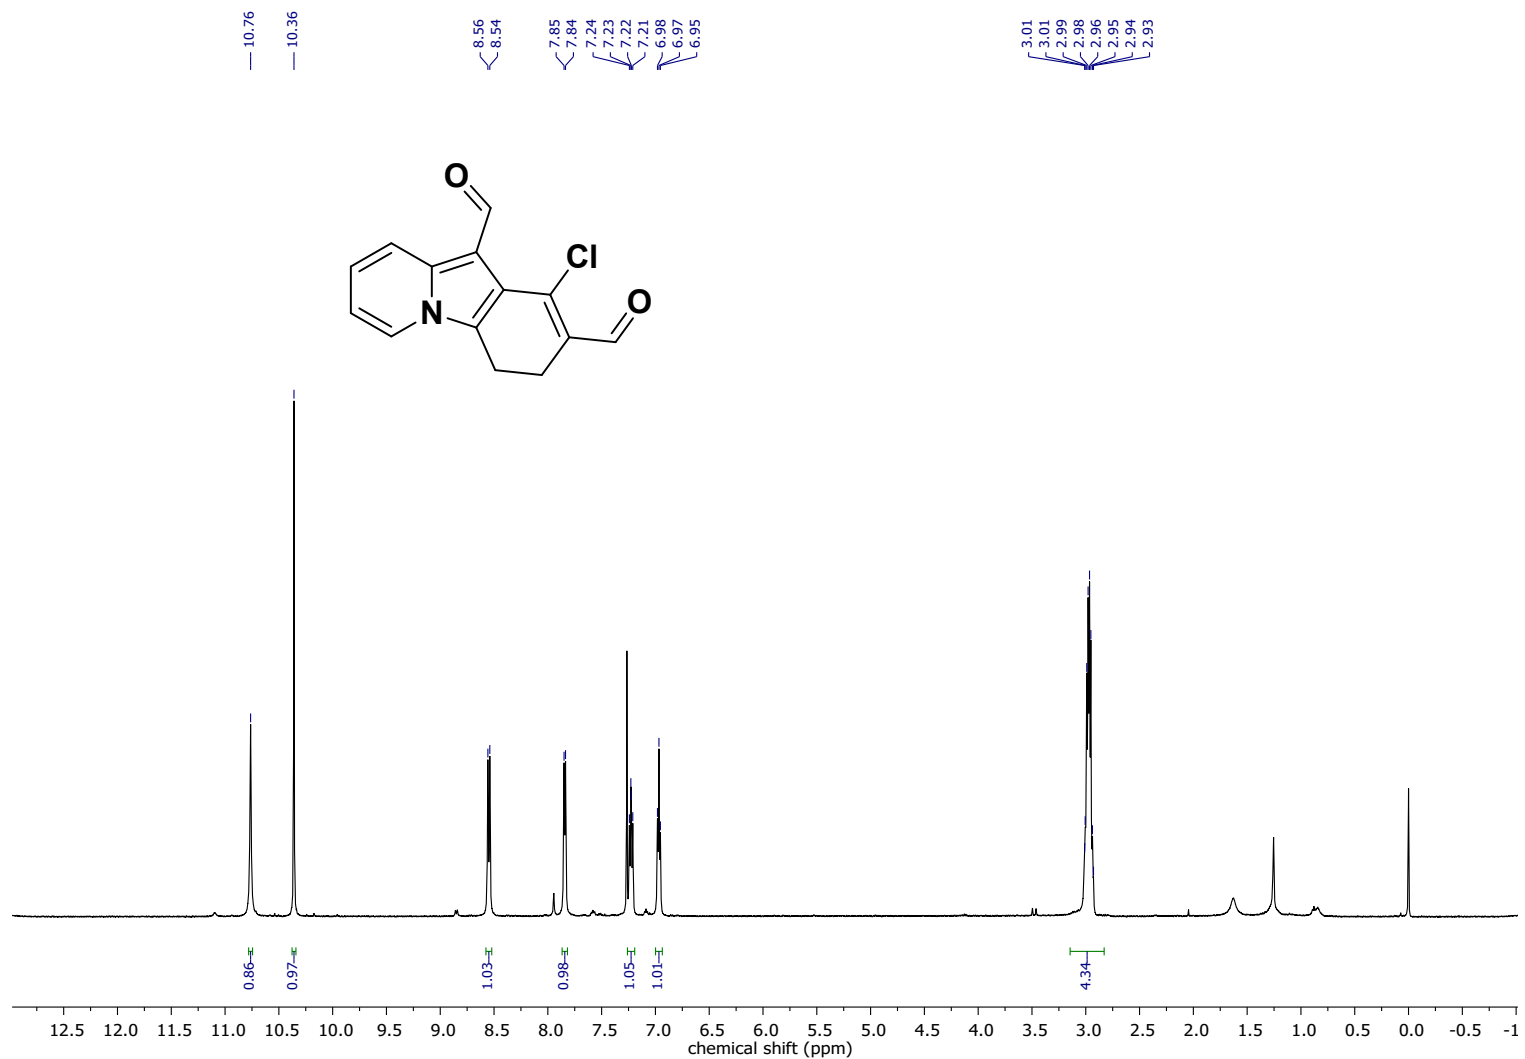

Figure S59. <sup>1</sup>H NMR spectrum (500 MHz, CDCl<sub>3</sub>) of compound 8.

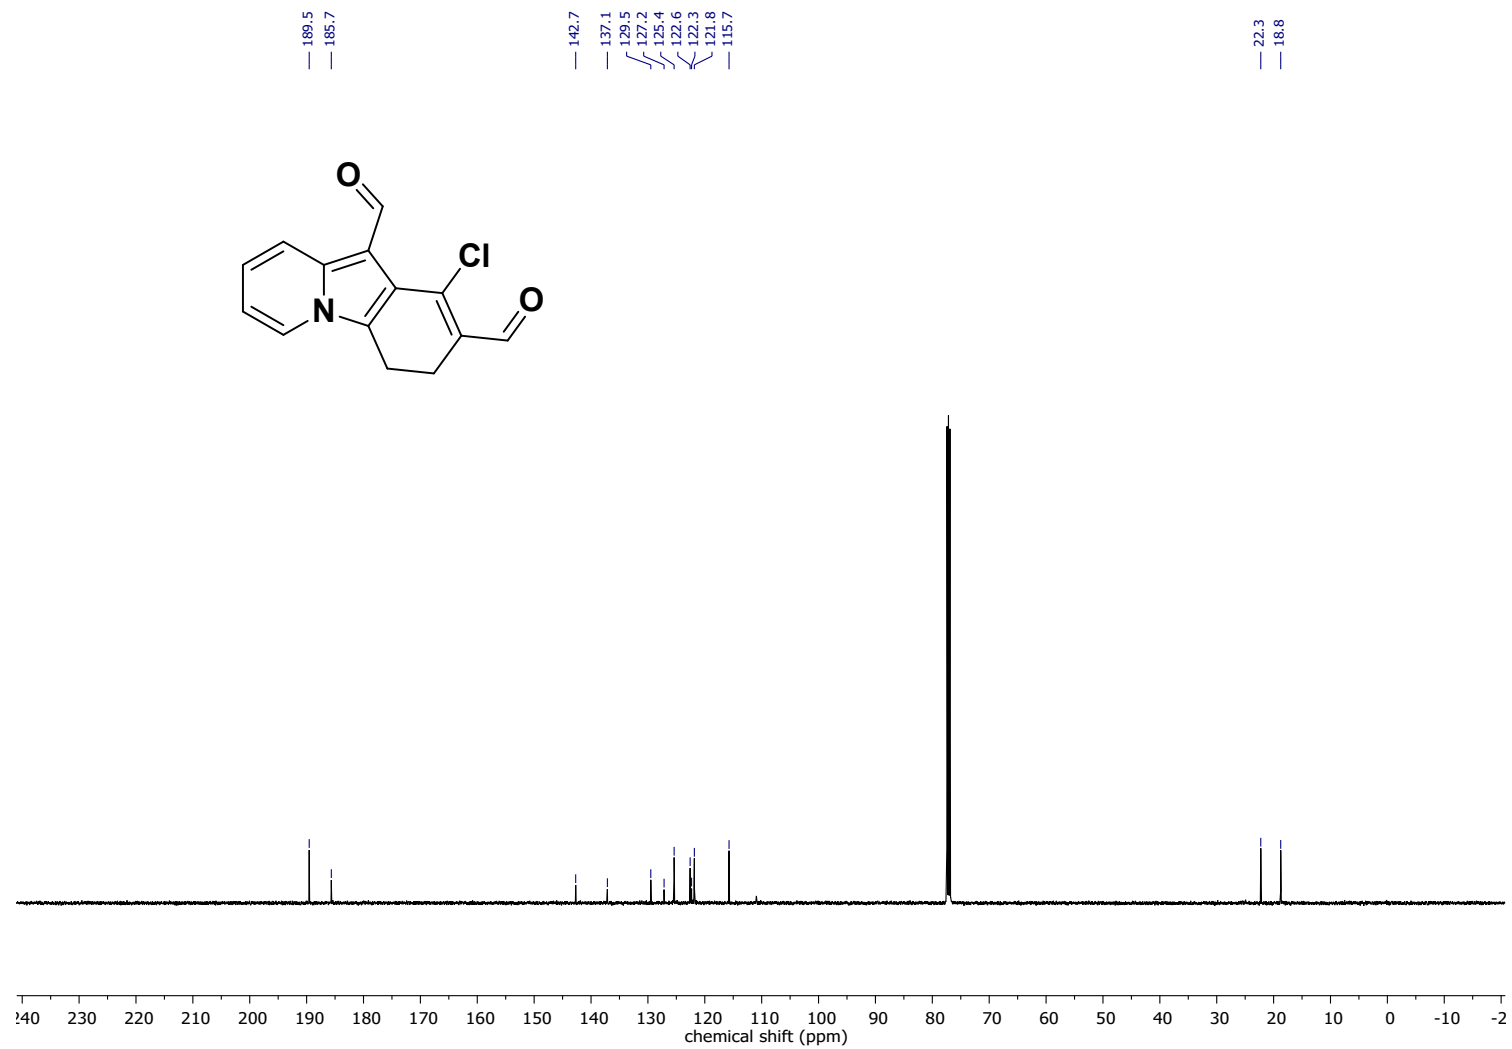

**Figure S60.**  $^{13}\text{C}$  NMR spectrum (126 MHz,  $\text{CDCl}_3$ ) of compound 8.

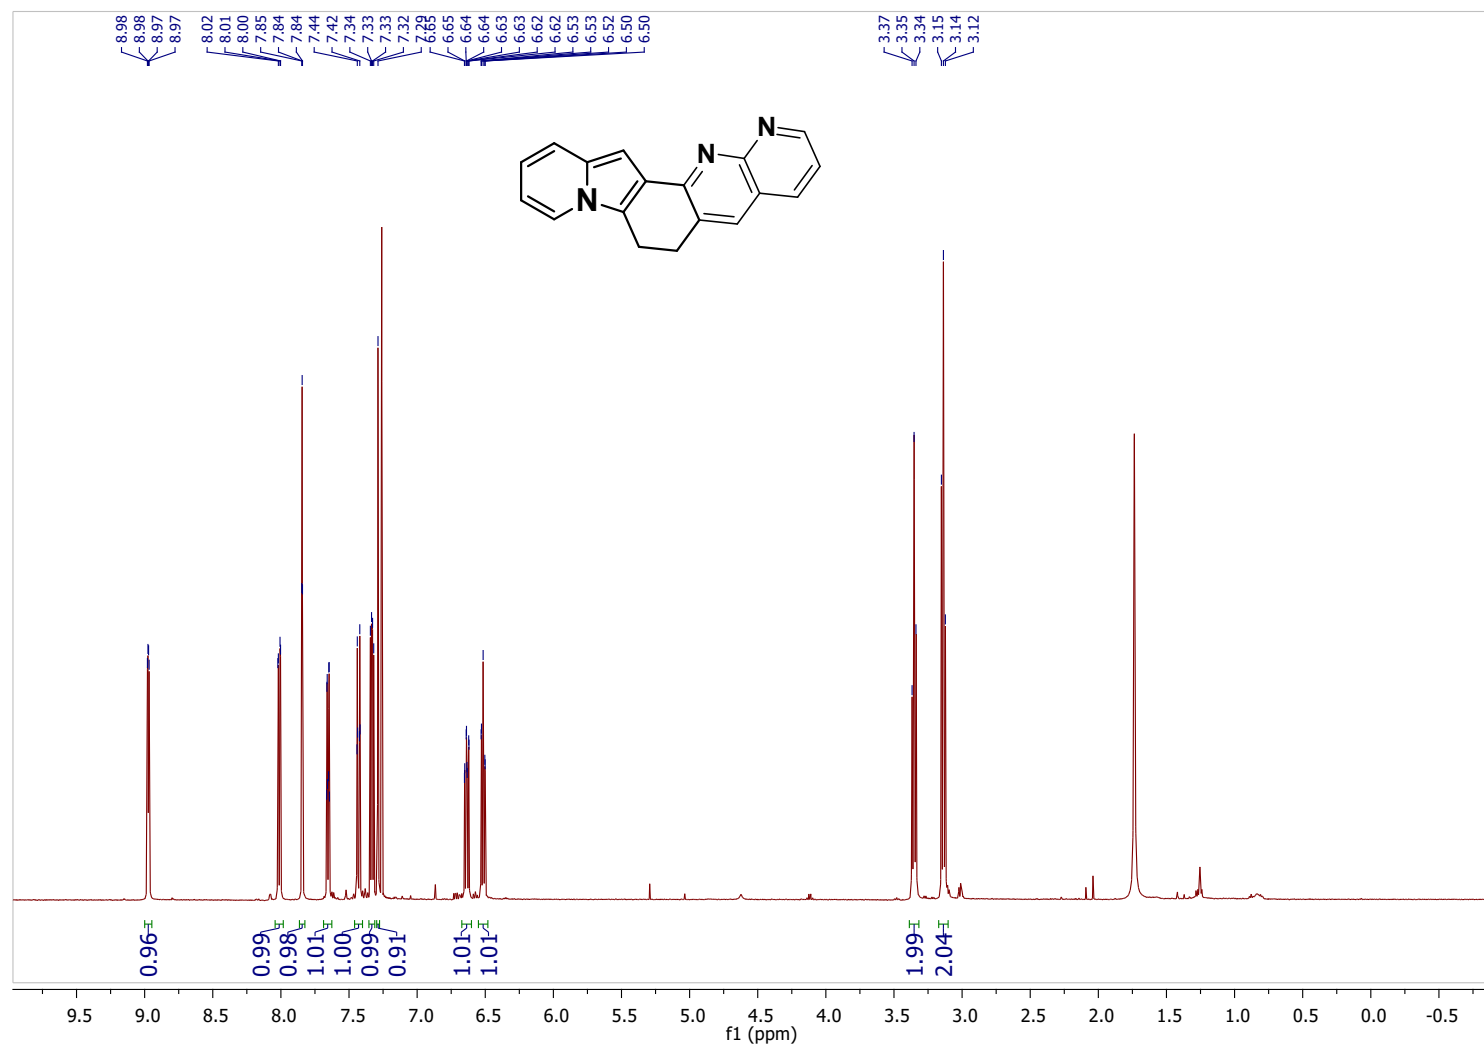

Figure S61.  $^1\text{H}$  NMR spectrum (500 MHz,  $\text{CDCl}_3$ ) of compound 10.

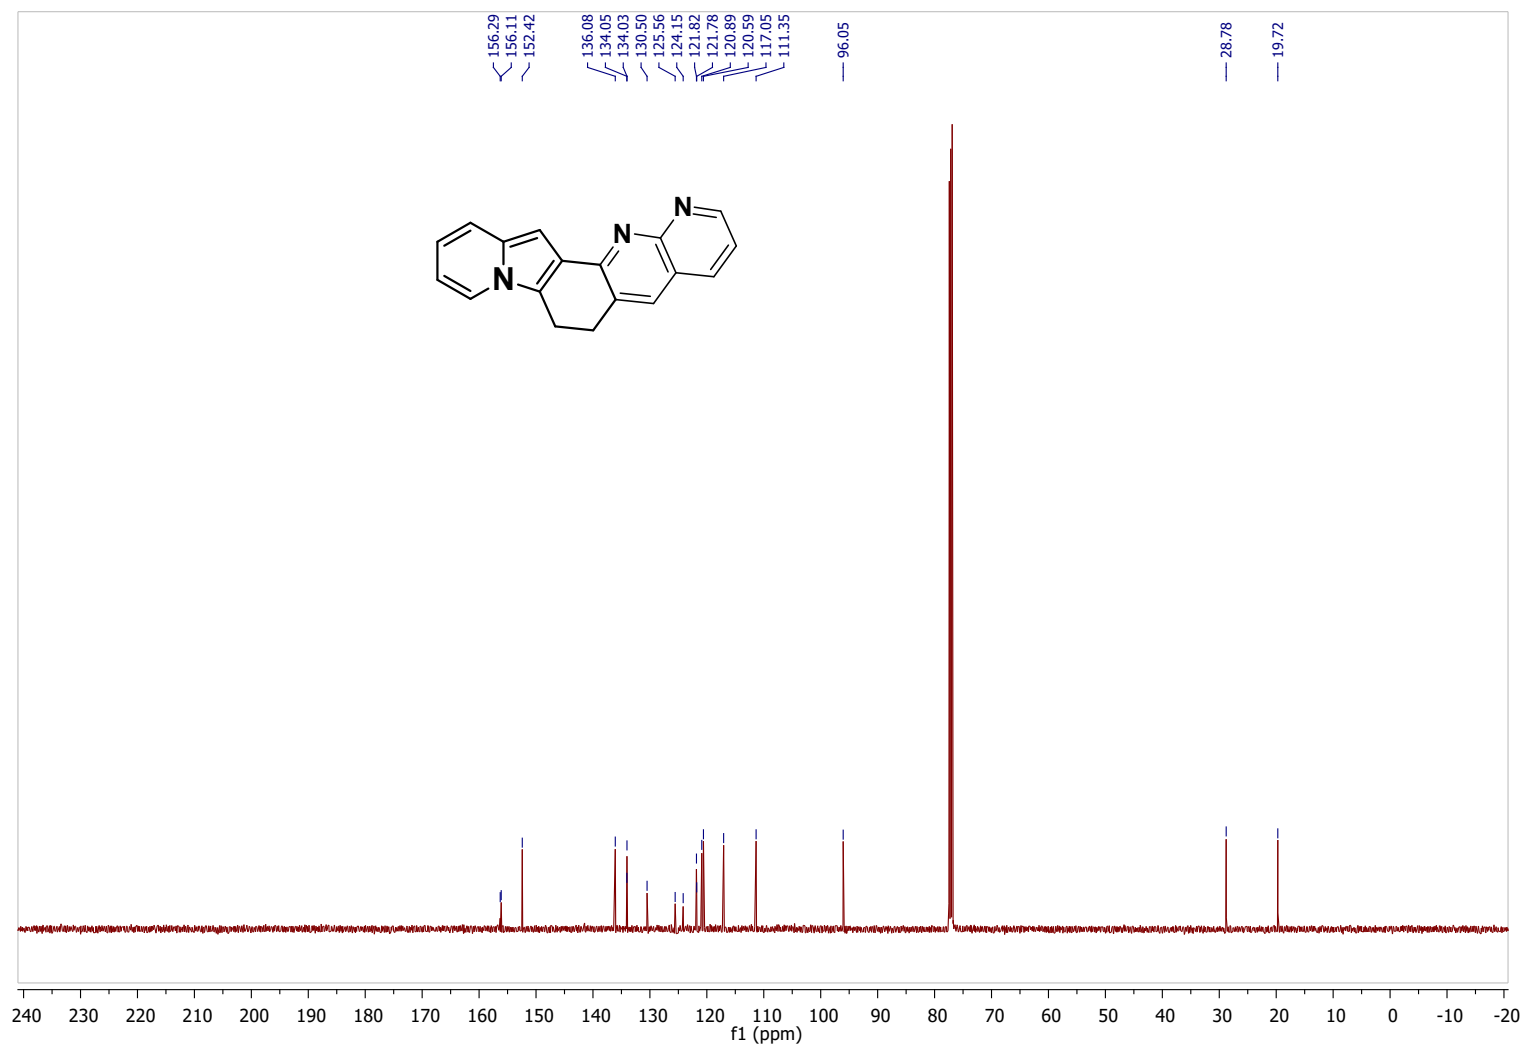

Figure S62. <sup>13</sup>C NMR spectrum (126 MHz, CDCl<sub>3</sub>) of compound 10.



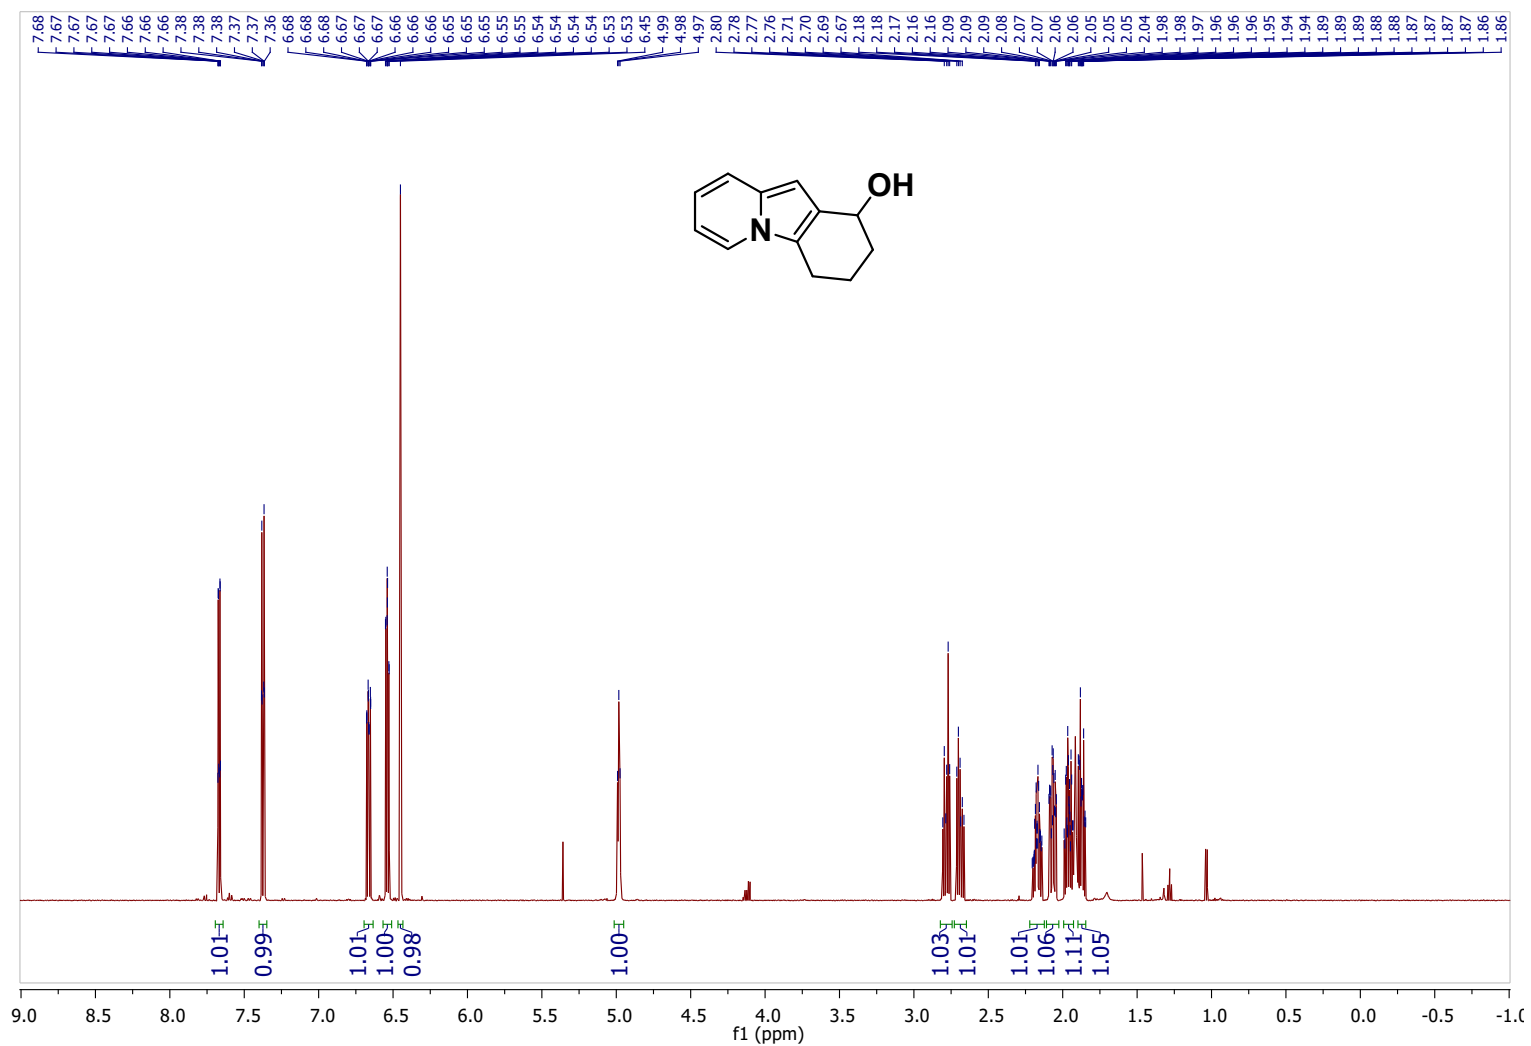

Figure S63. <sup>1</sup>H NMR spectrum (600 MHz, CD<sub>2</sub>Cl<sub>2</sub>) of compound *rac*-11.

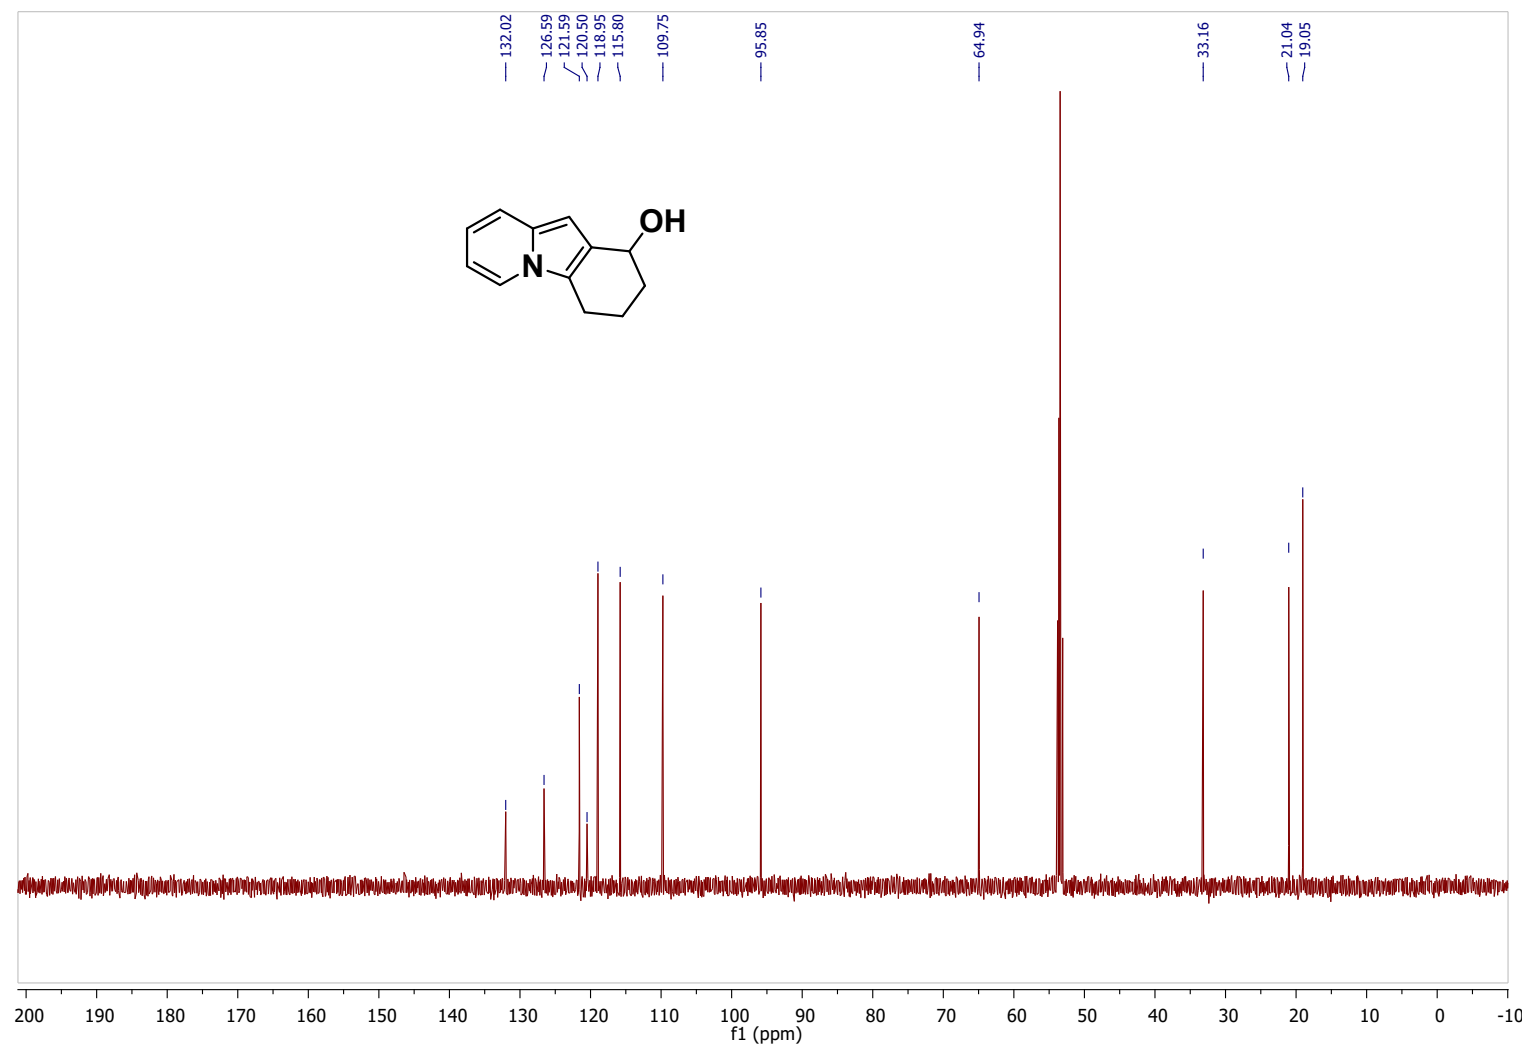

Figure S64.  $^{13}\text{C}$  NMR spectrum (151 MHz,  $\text{CD}_2\text{Cl}_2$ ) of compound *rac*-11.

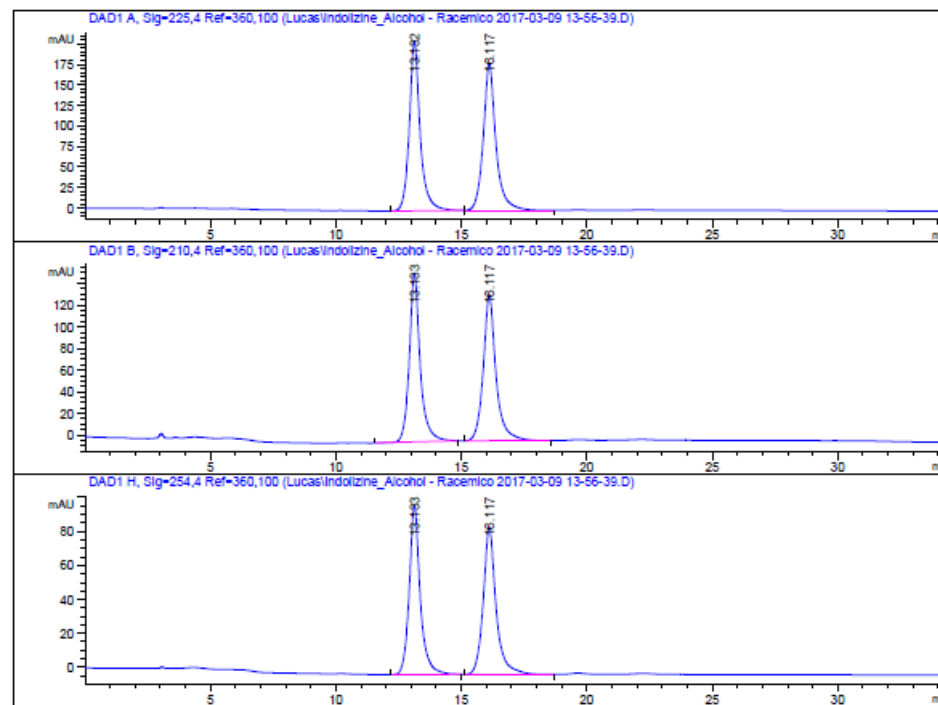

**Figure S65.** HPLC chromatogram of *rac-11*.

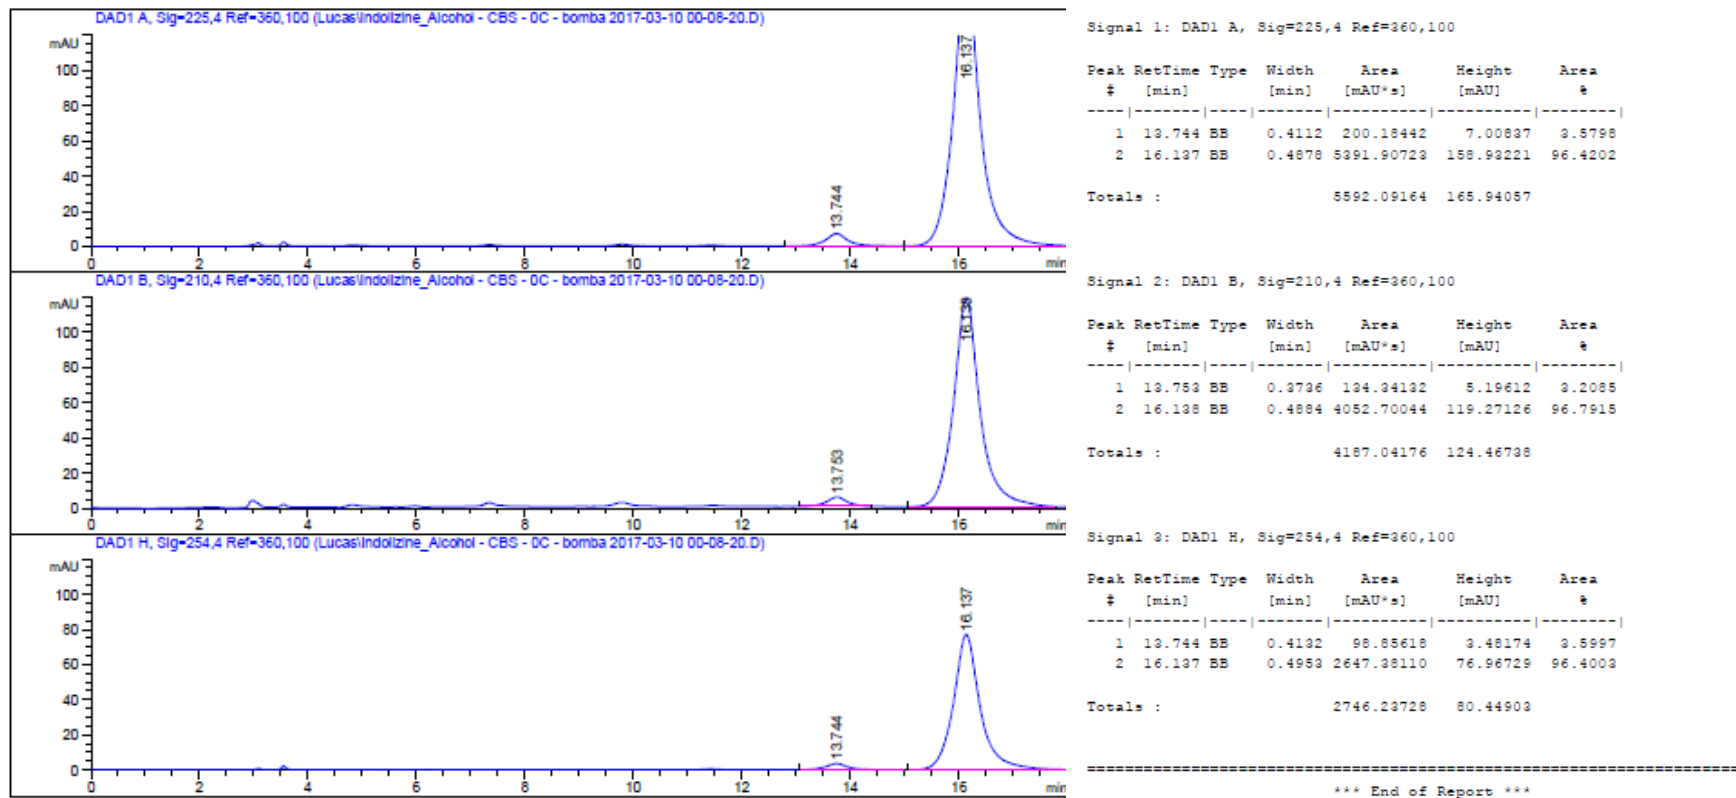

**Figure S66.** HPLC chromatogram of (*R*)-11.

## Computational Calculations

**Table S1:** Cartesian coordinates obtained for each species at the  $\omega$ B97xD/aug-cc-pVTZ level in water using the IEFPCM implicit solvent model. The corresponding Gibbs free energies (hartrees) and lowest harmonic vibrational frequency (LHVF) are given for each case.

### Starting material 5 members

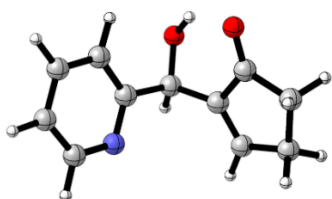

**Gibbs free energy** = -630.842490 hartrees  
**LHVF** = 25.3465 cm<sup>-1</sup>

|   |           |           |           |
|---|-----------|-----------|-----------|
| C | 1.202747  | 0.110553  | 0.503400  |
| C | 1.950722  | 1.033882  | -0.210873 |
| C | 3.093354  | 0.600620  | -0.863834 |
| C | 3.450500  | -0.733484 | -0.776978 |
| C | 2.642108  | -1.579300 | -0.033940 |
| N | 1.541967  | -1.174863 | 0.593366  |
| H | 3.695506  | 1.297146  | -1.430802 |
| H | 1.648198  | 2.069182  | -0.249392 |
| H | 4.333717  | -1.114991 | -1.267800 |
| H | 2.891485  | -2.629292 | 0.062975  |
| C | -0.078661 | 0.496072  | 1.236481  |
| H | -0.010944 | 0.067828  | 2.236752  |
| C | -1.271001 | -0.091378 | 0.532482  |
| C | -1.919501 | -1.229850 | 0.782182  |
| C | -1.890808 | 0.570866  | -0.625482 |
| H | -1.674656 | -1.909154 | 1.587658  |
| C | -3.016939 | -0.304212 | -1.126859 |
| C | -3.039580 | -1.501579 | -0.172919 |
| H | -2.813580 | -0.587484 | -2.159281 |
| H | -3.945656 | 0.264836  | -1.124760 |
| H | -2.881604 | -2.450872 | -0.686040 |
| H | -3.985388 | -1.590985 | 0.362763  |
| O | -1.557424 | 1.650247  | -1.085665 |
| O | -0.220856 | 1.891489  | 1.396823  |
| H | -0.562247 | 2.240801  | 0.563150  |

### Prod 5 members

### Transition state 5 members

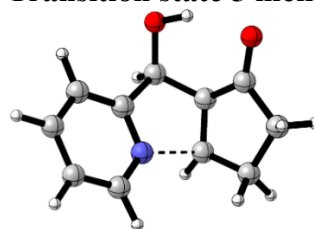

**Gibbs free energy** = -630.801502 hartrees  
**LHVF** = -317.8570cm<sup>-1</sup>

|   |           |           |           |
|---|-----------|-----------|-----------|
| C | 1.034254  | 0.562897  | 0.348795  |
| C | 2.197540  | 1.159225  | -0.099531 |
| C | 3.217126  | 0.345998  | -0.566855 |
| C | 3.060278  | -1.033718 | -0.555427 |
| C | 1.876982  | -1.558658 | -0.074220 |
| N | 0.903887  | -0.757645 | 0.344187  |
| H | 4.133182  | 0.783543  | -0.937873 |
| H | 2.291438  | 2.234811  | -0.089079 |
| H | 3.837267  | -1.691195 | -0.914209 |
| H | 1.689445  | -2.622951 | -0.030203 |
| C | -0.211809 | 1.301137  | 0.890207  |
| H | -0.001256 | 1.529149  | 1.940611  |
| C | -1.278783 | 0.271336  | 0.712734  |
| C | -0.866205 | -1.036015 | 1.018804  |
| C | -2.130779 | 0.250532  | -0.409633 |
| H | -0.485453 | -1.325314 | 1.990240  |
| C | -2.538725 | -1.185035 | -0.703969 |
| C | -1.679407 | -2.037810 | 0.239344  |
| H | -2.350288 | -1.390394 | -1.757637 |
| H | -3.605618 | -1.326783 | -0.531891 |
| H | -1.030918 | -2.728953 | -0.298150 |
| H | -2.273405 | -2.638623 | 0.927239  |
| O | -2.480344 | 1.225847  | -1.106713 |
| O | -0.450717 | 2.512873  | 0.220141  |
| H | -1.165941 | 2.331137  | -0.417277 |

### Starting material 6 members

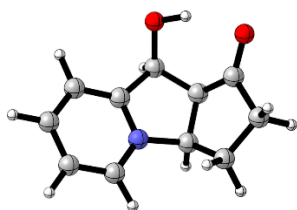

Gibbs free energy = -630.810268 hartrees  
LHVF = 36.2989 cm<sup>-1</sup>

|   |           |           |           |
|---|-----------|-----------|-----------|
| C | 1.000157  | 0.709484  | 0.291584  |
| C | 2.173938  | 1.284800  | -0.143809 |
| C | 3.218873  | 0.460092  | -0.523516 |
| C | 3.081382  | -0.920918 | -0.442075 |
| C | 1.894705  | -1.446715 | 0.008674  |
| N | 0.894006  | -0.626986 | 0.342443  |
| H | 4.144793  | 0.888576  | -0.878899 |
| H | 2.254635  | 2.360025  | -0.187147 |
| H | 3.883375  | -1.583351 | -0.726124 |
| H | 1.708768  | -2.505683 | 0.102778  |
| C | -0.291247 | 1.379919  | 0.754902  |
| H | -0.098564 | 1.777717  | 1.760742  |
| C | -1.225802 | 0.210423  | 0.707850  |
| C | -0.473294 | -1.057801 | 0.838985  |
| C | -2.264219 | 0.095654  | -0.184874 |
| H | -0.283488 | -1.425522 | 1.850028  |
| C | -2.503690 | -1.380721 | -0.488919 |
| C | -1.208865 | -2.085862 | -0.040030 |
| H | -2.704569 | -1.507872 | -1.552424 |
| H | -3.375402 | -1.752089 | 0.052559  |
| H | -0.596963 | -2.337313 | -0.906426 |
| H | -1.392747 | -3.010006 | 0.502476  |
| O | -2.917228 | 1.033540  | -0.740824 |
| O | -0.668226 | 2.443926  | -0.085431 |
| H | -1.525864 | 2.174571  | -0.477258 |

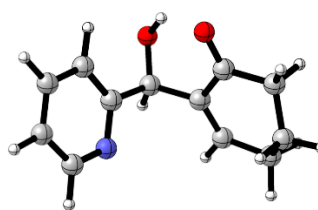

Gibbs free energy = -670.131597 hartrees  
LHVF = 93.4506 cm<sup>-1</sup>

|   |           |           |           |
|---|-----------|-----------|-----------|
| C | 1.436026  | 0.098708  | 0.493650  |
| C | 2.321084  | 0.904421  | -0.207372 |
| C | 3.388974  | 0.310828  | -0.859870 |
| C | 3.541068  | -1.062898 | -0.786597 |
| C | 2.610991  | -1.783554 | -0.054920 |
| N | 1.580742  | -1.223832 | 0.572059  |
| H | 4.092208  | 0.914679  | -1.416779 |
| H | 2.178825  | 1.973549  | -0.238514 |
| H | 4.359133  | -1.568105 | -1.278643 |
| H | 2.698988  | -2.860005 | 0.033168  |
| C | 0.230753  | 0.665471  | 1.240038  |
| H | 0.283164  | 0.270328  | 2.255053  |
| C | -1.060958 | 0.176901  | 0.616917  |
| C | -1.791630 | -0.796547 | 1.169720  |
| C | -1.514432 | 0.821893  | -0.630335 |
| C | -3.023628 | -1.378593 | 0.560671  |
| H | -1.474981 | -1.204538 | 2.123556  |
| C | -2.802113 | 0.337647  | -1.243936 |
| C | -3.085258 | -1.126400 | -0.939559 |
| H | -3.894728 | -0.938230 | 1.058668  |
| H | -3.061774 | -2.445687 | 0.780142  |
| H | -2.769000 | 0.542724  | -2.312473 |
| H | -3.593772 | 0.966237  | -0.820966 |
| H | -2.338710 | -1.749457 | -1.436795 |
| H | -4.058607 | -1.410505 | -1.335930 |
| O | -0.896700 | 1.760086  | -1.116123 |
| O | 0.270373  | 2.070901  | 1.358693  |
| H | 0.019423  | 2.420671  | 0.494106  |

Transition State 6 members

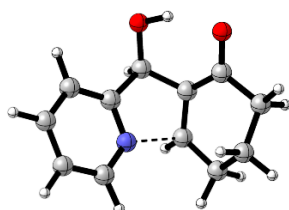

Gibbs free energy = -670.094889 hartrees  
LHVF = -308.8975 cm<sup>-1</sup>

|   |          |          |          |
|---|----------|----------|----------|
| C | 1.281823 | 0.560325 | 0.314085 |
|---|----------|----------|----------|

Prod 6 members

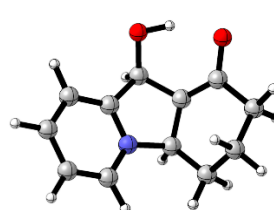

Gibbs free energy = -670.104937 hartrees  
LHVF = 46.7080 cm<sup>-1</sup>

|   |          |          |          |
|---|----------|----------|----------|
| C | 1.231304 | 0.728872 | 0.257049 |
|---|----------|----------|----------|

|   |           |           |           |   |           |           |           |
|---|-----------|-----------|-----------|---|-----------|-----------|-----------|
| C | 2.464173  | 1.041788  | -0.214279 | C | 2.422760  | 1.196165  | -0.250403 |
| C | 3.393941  | 0.127786  | -0.684034 | C | 3.388331  | 0.279143  | -0.628560 |
| C | 3.132003  | -1.232804 | -0.594304 | C | 3.154359  | -1.080767 | -0.467297 |
| C | 1.935053  | -1.638179 | -0.035414 | C | 1.952882  | -1.495563 | 0.056519  |
| N | 1.048162  | -0.743532 | 0.382275  | N | 1.024927  | -0.591248 | 0.379707  |
| H | 4.322037  | 0.472462  | -1.117943 | H | 4.326296  | 0.619096  | -1.043172 |
| H | 2.640382  | 2.105847  | -0.261958 | H | 2.576065  | 2.259439  | -0.350967 |
| H | 3.837300  | -1.966424 | -0.953707 | H | 3.893016  | -1.815475 | -0.745240 |
| H | 1.668822  | -2.681356 | 0.069093  | H | 1.709697  | -2.533834 | 0.214960  |
| C | 0.124332  | 1.403552  | 0.883971  | C | 0.016824  | 1.503601  | 0.738827  |
| H | 0.356523  | 1.538838  | 1.948661  | H | 0.242219  | 1.815225  | 1.772286  |
| C | -1.057951 | 0.491533  | 0.695596  | C | -1.031414 | 0.424291  | 0.665452  |
| C | -0.735940 | -0.802398 | 1.144776  | C | -0.352834 | -0.863047 | 0.982100  |
| C | -2.003220 | 0.702405  | -0.324252 | C | -2.153423 | 0.542123  | -0.109077 |
| C | -1.487714 | -2.005333 | 0.671172  | C | -1.054918 | -2.118010 | 0.485806  |
| H | -0.310682 | -0.903862 | 2.138270  | H | -0.128212 | -0.976880 | 2.047151  |
| C | -2.898672 | -0.461877 | -0.700997 | C | -2.876792 | -0.729063 | -0.517606 |
| C | -2.123880 | -1.775896 | -0.690916 | C | -1.887758 | -1.865233 | -0.762300 |
| H | -2.258844 | -2.212730 | 1.420106  | H | -1.713283 | -2.441070 | 1.294518  |
| H | -0.828702 | -2.873829 | 0.670189  | H | -0.347799 | -2.933340 | 0.336620  |
| H | -3.319512 | -0.255292 | -1.683738 | H | -3.446710 | -0.506765 | -1.419366 |
| H | -3.731501 | -0.512865 | 0.006412  | H | -3.595882 | -1.019348 | 0.254062  |
| H | -1.340636 | -1.737426 | -1.452298 | H | -1.235222 | -1.601590 | -1.598960 |
| H | -2.778876 | -2.608196 | -0.945623 | H | -2.412017 | -2.779446 | -1.041064 |
| O | -2.151702 | 1.803090  | -0.914072 | O | -2.602641 | 1.666387  | -0.545192 |
| O | 0.029429  | 2.667004  | 0.287615  | O | -0.237918 | 2.635085  | -0.046180 |
| H | -0.758940 | 2.613402  | -0.294160 | H | -1.174103 | 2.505875  | -0.350861 |

**Starting material 7 members**

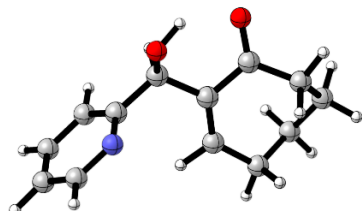

**Gibbs free energy = -709.406403 hartrees**  
**LHVF = 29.1817 cm<sup>-1</sup>**

**Transition state 7 members**

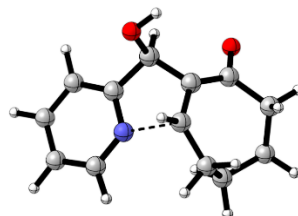

**Gibbs free energy = -709.371720 hartrees**  
**LHVF = -305.5719 cm<sup>-1</sup>**

|   |           |           |           |   |           |           |           |
|---|-----------|-----------|-----------|---|-----------|-----------|-----------|
| C | -1.818358 | 0.406377  | -0.172140 | C | -1.475932 | 0.653840  | -0.223745 |
| C | -2.523341 | -0.044091 | -1.279415 | C | -2.730326 | 0.879871  | -0.755300 |
| C | -3.716968 | -0.719814 | -1.087352 | C | -3.684135 | -0.114412 | -0.662104 |
| C | -4.169610 | -0.913818 | 0.205463  | C | -3.376774 | -1.307971 | -0.016711 |
| C | -3.400683 | -0.423021 | 1.249346  | C | -2.117990 | -1.483772 | 0.498636  |
| N | -2.248583 | 0.217271  | 1.075295  | N | -1.199280 | -0.518507 | 0.361811  |
| H | -4.284214 | -1.082952 | -1.933003 | H | -4.669416 | 0.035833  | -1.078723 |
| H | -2.140451 | 0.132625  | -2.274802 | H | -2.942707 | 1.827489  | -1.225513 |
| H | -5.095841 | -1.431462 | 0.407535  | H | -4.106087 | -2.095222 | 0.087725  |
| H | -3.725143 | -0.555462 | 2.274724  | H | -1.819543 | -2.377962 | 1.021321  |
| C | -0.499995 | 1.122214  | -0.350306 | C | -0.303557 | 1.589786  | -0.132775 |

|   |           |           |           |   |           |           |           |
|---|-----------|-----------|-----------|---|-----------|-----------|-----------|
| H | -0.412034 | 1.390599  | -1.408151 | H | -0.082127 | 2.041178  | -1.100575 |
| O | -0.534539 | 2.312899  | 0.422727  | O | -0.669553 | 2.701189  | 0.718973  |
| H | 0.250018  | 2.811265  | 0.174366  | H | -0.350551 | 2.479123  | 1.596993  |
| C | 0.713231  | 0.261260  | -0.013403 | C | 0.778799  | 0.703534  | 0.350653  |
| C | 0.633247  | -1.056510 | 0.198966  | C | 0.207750  | -0.582283 | 0.899576  |
| C | 2.002313  | 1.003710  | -0.035219 | C | 2.099486  | 0.958523  | 0.018344  |
| C | 1.744064  | -2.055430 | 0.347761  | C | 0.894954  | -1.907237 | 0.517198  |
| C | 3.191367  | 0.428977  | 0.685616  | C | 3.141437  | -0.105847 | 0.327408  |
| C | 2.946594  | -1.802268 | -0.566893 | C | 1.654855  | -1.868742 | -0.804756 |
| H | 1.327365  | -3.037884 | 0.130242  | H | 0.152047  | -2.703700 | 0.500629  |
| H | 2.065864  | -2.098553 | 1.393659  | H | 1.573434  | -2.171805 | 1.328386  |
| C | 3.892233  | -0.713702 | -0.062770 | C | 3.064988  | -1.284483 | -0.651669 |
| H | 2.850132  | 0.063812  | 1.655898  | H | 3.015284  | -0.470972 | 1.348702  |
| H | 3.894164  | 1.240964  | 0.860484  | H | 4.127162  | 0.354350  | 0.272934  |
| H | 3.504961  | -2.730461 | -0.685623 | H | 1.728436  | -2.878046 | -1.210371 |
| H | 2.569062  | -1.537972 | -1.556600 | H | 1.083458  | -1.285122 | -1.528966 |
| H | 4.617282  | -1.146625 | 0.627202  | H | 3.740573  | -2.067178 | -0.298971 |
| H | 4.457502  | -0.303497 | -0.899798 | H | 3.433702  | -0.971036 | -1.630256 |
| O | 2.066471  | 2.098835  | -0.574395 | O | 2.485368  | 2.012559  | -0.567633 |
| H | -0.358597 | -1.492471 | 0.202214  | H | 0.063453  | -0.582192 | 1.984745  |

### Prod 7 members

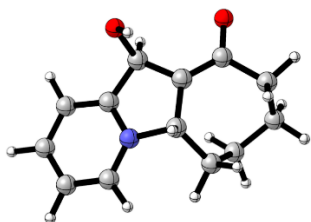

Gibbs free energy = -709.386840 hartrees

LHVF = 24.1811 cm<sup>-1</sup>

|   |           |           |           |
|---|-----------|-----------|-----------|
| C | -1.475670 | 0.509343  | -0.224707 |
| C | -2.754271 | 0.613863  | -0.735978 |
| C | -3.636593 | -0.431494 | -0.546840 |
| C | -3.234882 | -1.552815 | 0.172086  |
| C | -1.955654 | -1.608222 | 0.663545  |
| N | -1.107389 | -0.597184 | 0.433911  |
| H | -4.639029 | -0.376497 | -0.945612 |
| H | -3.040675 | 1.509237  | -1.265567 |
| H | -3.906956 | -2.376604 | 0.351684  |
| H | -1.585798 | -2.441006 | 1.239324  |
| C | -0.367193 | 1.524212  | -0.232143 |
| H | -0.198864 | 1.918341  | -1.235014 |
| O | -0.787595 | 2.667638  | 0.549191  |
| H | -0.434356 | 2.530699  | 1.431497  |
| C | 0.783153  | 0.747869  | 0.282280  |
| C | 0.312681  | -0.529771 | 0.935758  |
| C | 2.075725  | 1.064278  | -0.103475 |



|   |          |           |           |
|---|----------|-----------|-----------|
| C | 1.078598 | -1.830918 | 0.628587  |
| C | 3.193770 | 0.095469  | 0.250713  |
| C | 1.803729 | -1.837923 | -0.713288 |
| H | 0.390814 | -2.673471 | 0.688548  |
| H | 1.791738 | -1.991411 | 1.437308  |
| C | 3.174460 | -1.153023 | -0.640641 |
| H | 3.115893 | -0.202710 | 1.298232  |
| H | 4.144771 | 0.614153  | 0.136832  |
| H | 1.935792 | -2.866797 | -1.048860 |
| H | 1.177912 | -1.346617 | -1.460657 |
| H | 3.909103 | -1.862359 | -0.252615 |
| H | 3.498742 | -0.887309 | -1.648644 |
| O | 2.376255 | 2.096437  | -0.772500 |
| H | 0.193579 | -0.461062 | 2.021809  |

**Table S2:** Cartesian coordinates obtained for each species at the  $\omega$ B97xD/aug-cc-pVTZ level in the gas phase. The corresponding Gibbs free energies (hartrees) and lowest harmonic vibrational frequency (LHVF) are given for each case.

**Starting material 5 members**

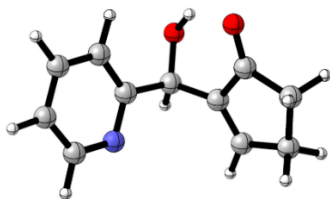

**Gibbs free energy** = -630.830711 hartrees  
**LHVF** = 31.1128 cm<sup>-1</sup>

**Transition state 5 members**

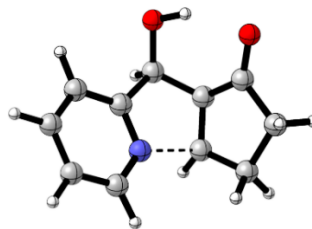

**Gibbs free energy** = -630.780543 hartrees  
**LHVF** = -274.1821 cm<sup>-1</sup>

|   |           |           |           |
|---|-----------|-----------|-----------|
| C | 1.208096  | 0.145195  | 0.479537  |
| C | 2.012372  | 1.043103  | -0.204864 |
| C | 3.151278  | 0.565085  | -0.830393 |
| C | 3.448543  | -0.783664 | -0.744454 |
| C | 2.585006  | -1.598806 | -0.029688 |
| N | 1.487434  | -1.153066 | 0.568701  |
| H | 3.798519  | 1.238646  | -1.375782 |
| H | 1.748821  | 2.089130  | -0.233041 |
| H | 4.328015  | -1.199178 | -1.214821 |
| H | 2.785331  | -2.659706 | 0.067449  |
| C | -0.068029 | 0.586972  | 1.191592  |
| H | 0.009852  | 0.223941  | 2.217752  |
| C | -1.259915 | -0.057386 | 0.537409  |
| C | -1.827771 | -1.231999 | 0.804831  |
| C | -1.949418 | 0.564565  | -0.608475 |
| H | -1.501183 | -1.898955 | 1.591202  |
| C | -3.054834 | -0.372092 | -1.058071 |

|   |           |           |           |
|---|-----------|-----------|-----------|
| C | 0.999188  | 0.610367  | 0.367658  |
| C | 2.150162  | 1.190511  | -0.132928 |
| C | 3.151560  | 0.365108  | -0.611926 |
| C | 2.999642  | -1.016434 | -0.556046 |
| C | 1.836258  | -1.528951 | -0.023092 |
| N | 0.876629  | -0.712356 | 0.399267  |
| H | 4.051980  | 0.791219  | -1.032678 |
| H | 2.226787  | 2.267297  | -0.162945 |
| H | 3.765097  | -1.682092 | -0.925183 |
| H | 1.645912  | -2.590889 | 0.059086  |
| C | -0.260376 | 1.337035  | 0.895085  |
| H | -0.045832 | 1.589949  | 1.942876  |
| C | -1.286765 | 0.261988  | 0.739974  |
| C | -0.756508 | -1.027240 | 1.012706  |
| C | -2.110982 | 0.209791  | -0.403857 |
| H | -0.443645 | -1.318571 | 2.013563  |
| C | -2.442590 | -1.250200 | -0.710892 |

|   |           |           |           |
|---|-----------|-----------|-----------|
| C | -2.965545 | -1.572885 | -0.111052 |
| H | -2.893433 | -0.635862 | -2.102612 |
| H | -4.009082 | 0.150367  | -1.002925 |
| H | -2.764393 | -2.506867 | -0.638519 |
| H | -3.885546 | -1.728814 | 0.454789  |
| O | -1.682545 | 1.640781  | -1.101821 |
| O | -0.205874 | 1.983267  | 1.260388  |
| H | -0.600288 | 2.277849  | 0.428831  |

**Prod 5 members**

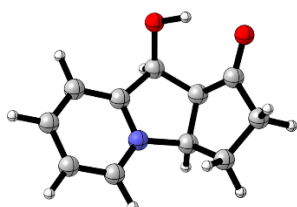

**Gibbs free energy = -630.781914 hartrees**  
**LHVF = 41.5761 cm<sup>-1</sup>**

|   |           |           |           |
|---|-----------|-----------|-----------|
| C | 0.969707  | 0.687733  | 0.343300  |
| C | 2.123152  | 1.258057  | -0.160040 |
| C | 3.134279  | 0.429314  | -0.608241 |
| C | 2.994126  | -0.953045 | -0.518365 |
| C | 1.832723  | -1.467952 | 0.006510  |
| N | 0.857891  | -0.644052 | 0.394858  |
| H | 4.036474  | 0.851338  | -1.029011 |
| H | 2.190852  | 2.334287  | -0.213478 |
| H | 3.771443  | -1.620264 | -0.857371 |
| H | 1.645033  | -2.526515 | 0.112799  |
| C | -0.308087 | 1.373045  | 0.848729  |
| H | -0.092442 | 1.700791  | 1.878260  |
| C | -1.266798 | 0.224497  | 0.758470  |
| C | -0.550282 | -1.038561 | 0.945861  |
| C | -2.157707 | 0.128696  | -0.310824 |
| H | -0.314528 | -1.360897 | 1.965354  |
| C | -2.377181 | -1.345541 | -0.655525 |
| C | -1.304115 | -2.107640 | 0.140276  |
| H | -2.274227 | -1.462484 | -1.734033 |
| H | -3.385772 | -1.661636 | -0.391254 |
| H | -0.630440 | -2.662980 | -0.514705 |
| H | -1.735670 | -2.833349 | 0.827209  |
| O | -2.663306 | 1.060364  | -0.966786 |
| O | -0.627797 | 2.487336  | 0.078261  |
| H | -1.426023 | 2.236863  | -0.440469 |

**Transition State 6 members**

|   |           |           |           |
|---|-----------|-----------|-----------|
| C | -1.530825 | -2.065234 | 0.218489  |
| H | -2.253634 | -1.430889 | -1.768579 |
| H | -3.498398 | -1.450059 | -0.531955 |
| H | -0.857594 | -2.722936 | -0.333933 |
| H | -2.089406 | -2.700898 | 0.904834  |
| O | -2.479598 | 1.157614  | -1.110193 |
| O | -0.506249 | 2.516298  | 0.196056  |
| H | -1.243476 | 2.322622  | -0.417895 |

**Starting material 6 members**

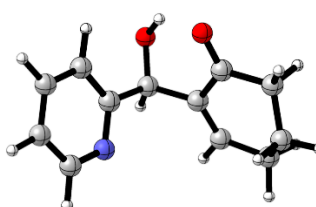

**Gibbs free energy = -670.119474 hartrees**  
**LHVF = 27.8603 cm<sup>-1</sup>**

|   |           |           |           |
|---|-----------|-----------|-----------|
| C | 1.433253  | 0.118863  | 0.481194  |
| C | 2.353977  | 0.900104  | -0.200977 |
| C | 3.409147  | 0.273504  | -0.840591 |
| C | 3.513617  | -1.104849 | -0.771403 |
| C | 2.549064  | -1.796720 | -0.056894 |
| N | 1.529582  | -1.206850 | 0.555397  |
| H | 4.141069  | 0.855200  | -1.384663 |
| H | 2.243017  | 1.973076  | -0.220257 |
| H | 4.321826  | -1.635152 | -1.254135 |
| H | 2.598248  | -2.876279 | 0.029053  |
| C | 0.241227  | 0.727755  | 1.216785  |
| H | 0.303592  | 0.369664  | 2.245662  |
| C | -1.052986 | 0.209495  | 0.622655  |
| C | -1.731950 | -0.796757 | 1.177498  |
| C | -1.542982 | 0.837042  | -0.623371 |
| C | -2.953937 | -1.423638 | 0.586944  |
| H | -1.371475 | -1.207514 | 2.114174  |
| C | -2.837025 | 0.317259  | -1.203667 |
| C | -3.055504 | -1.160172 | -0.909752 |
| H | -3.836046 | -1.027072 | 1.103161  |
| H | -2.943528 | -2.494691 | 0.792740  |
| H | -2.840200 | 0.538942  | -2.269215 |
| H | -3.638057 | 0.911294  | -0.749555 |
| H | -2.291188 | -1.746331 | -1.424908 |
| H | -4.022591 | -1.484458 | -1.292961 |
| O | -0.955613 | 1.771362  | -1.139560 |
| O | 0.288149  | 2.129576  | 1.281780  |
| H | 0.012567  | 2.452462  | 0.414837  |

**Prod 6 members**

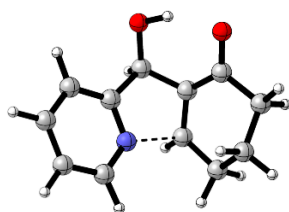

**Gibbs free energy = -670.074700 hartrees**  
**LHVF = -281.5936 cm<sup>-1</sup>**

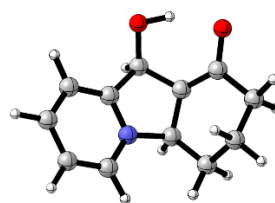

**Gibbs free energy = -670.076294 hartrees**  
**LHVF = 48.4528 cm<sup>-1</sup>**

|   |           |           |           |
|---|-----------|-----------|-----------|
| C | 1.252313  | 0.610327  | 0.327645  |
| C | 2.423263  | 1.069713  | -0.245497 |
| C | 3.330171  | 0.140507  | -0.723219 |
| C | 3.066557  | -1.218947 | -0.592929 |
| C | 1.888789  | -1.606384 | 0.011112  |
| N | 1.019765  | -0.693238 | 0.429815  |
| H | 4.243430  | 0.468296  | -1.200668 |
| H | 2.585245  | 2.134136  | -0.328599 |
| H | 3.756490  | -1.963627 | -0.960070 |
| H | 1.617127  | -2.644337 | 0.149944  |
| C | 0.085360  | 1.450787  | 0.879385  |
| H | 0.327063  | 1.616034  | 1.942402  |
| C | -1.061737 | 0.490900  | 0.717501  |
| C | -0.628389 | -0.799171 | 1.133557  |
| C | -2.010112 | 0.668576  | -0.306401 |
| C | -1.356592 | -2.026358 | 0.657595  |
| H | -0.270868 | -0.892044 | 2.159990  |
| C | -2.851187 | -0.539452 | -0.690339 |
| C | -2.006689 | -1.809772 | -0.701638 |
| H | -2.123236 | -2.248824 | 1.405527  |
| H | -0.685121 | -2.887699 | 0.652729  |
| H | -3.285113 | -0.338262 | -1.667893 |
| H | -3.676003 | -0.642867 | 0.020282  |
| H | -1.228978 | -1.715563 | -1.465115 |
| H | -2.611303 | -2.676969 | -0.969083 |
| O | -2.198207 | 1.750583  | -0.898637 |
| O | -0.019804 | 2.679737  | 0.243559  |
| H | -0.833488 | 2.617474  | -0.308165 |

|   |           |           |           |
|---|-----------|-----------|-----------|
| C | 1.220322  | 0.705479  | 0.300642  |
| C | 2.394675  | 1.157111  | -0.268178 |
| C | 3.320043  | 0.227797  | -0.703828 |
| C | 3.074548  | -1.131611 | -0.532743 |
| C | 1.896547  | -1.525482 | 0.057092  |
| N | 1.002183  | -0.608318 | 0.429354  |
| H | 4.235961  | 0.552924  | -1.177620 |
| H | 2.540106  | 2.220939  | -0.380630 |
| H | 3.783029  | -1.876701 | -0.860067 |
| H | 1.637955  | -2.559984 | 0.223511  |
| C | 0.024596  | 1.502573  | 0.810348  |
| H | 0.267329  | 1.759089  | 1.859490  |
| C | -1.047340 | 0.449524  | 0.710658  |
| C | -0.412878 | -0.836042 | 1.052953  |
| C | -2.089731 | 0.579498  | -0.195191 |
| C | -1.122546 | -2.087963 | 0.569087  |
| H | -0.163133 | -0.943034 | 2.116768  |
| C | -2.830520 | -0.686730 | -0.602660 |
| C | -1.866880 | -1.861457 | -0.739797 |
| H | -1.840040 | -2.352100 | 1.349047  |
| H | -0.434605 | -2.933596 | 0.502455  |
| H | -3.335827 | -0.475751 | -1.543385 |
| H | -3.601552 | -0.918264 | 0.137495  |
| H | -1.152360 | -1.648341 | -1.540676 |
| H | -2.397323 | -2.772029 | -1.021900 |
| O | -2.437278 | 1.673672  | -0.713703 |
| O | -0.169507 | 2.663727  | 0.078447  |
| H | -1.065549 | 2.549712  | -0.338218 |

**Starting material 7 members**

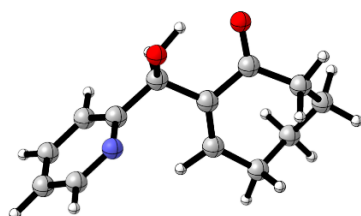

**Gibbs free energy = -709.391351 hartrees**  
**LHVF = 28.4687 cm<sup>-1</sup>**

**Transition state 7 members**

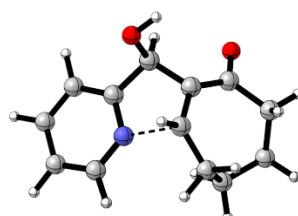

**Gibbs free energy = -709.350448 hartrees**  
**LHVF = -292.2495 cm<sup>-1</sup>**

|   |           |           |           |   |           |           |           |
|---|-----------|-----------|-----------|---|-----------|-----------|-----------|
| C | 1.826901  | 0.379732  | 0.151907  | C | -1.491738 | 0.610238  | -0.109127 |
| C | 2.648138  | 0.140190  | 1.245190  | C | -2.710906 | 0.799773  | -0.738355 |
| C | 3.851650  | -0.516826 | 1.051666  | C | -3.553787 | -0.285268 | -0.894122 |
| C | 4.195967  | -0.905078 | -0.229899 | C | -3.181118 | -1.528211 | -0.395636 |
| C | 3.310373  | -0.621270 | -1.259367 | C | -1.965756 | -1.639777 | 0.246636  |
| N | 2.151069  | -0.002429 | -1.081726 | N | -1.159465 | -0.590601 | 0.349597  |
| H | 4.510055  | -0.715136 | 1.886532  | H | -4.503313 | -0.167920 | -1.397940 |
| H | 2.348856  | 0.470907  | 2.230190  | H | -2.982924 | 1.783472  | -1.090609 |
| H | 5.126242  | -1.415442 | -0.434330 | H | -3.816372 | -2.393756 | -0.508322 |
| H | 3.544711  | -0.910592 | -2.277597 | H | -1.611924 | -2.571706 | 0.667628  |
| C | 0.511966  | 1.104379  | 0.325835  | C | -0.425124 | 1.654633  | 0.175204  |
| H | 0.440160  | 1.412679  | 1.375773  | H | -0.262841 | 2.297941  | -0.691499 |
| O | 0.550466  | 2.254006  | -0.493883 | O | -0.960118 | 2.416970  | 1.270198  |
| H | -0.212045 | 2.786315  | -0.250594 | H | -0.216939 | 2.893753  | 1.643742  |
| C | -0.711365 | 0.237520  | 0.045846  | C | 0.797560  | 0.858220  | 0.451370  |
| C | -0.657956 | -1.091735 | -0.060130 | C | 0.450093  | -0.321285 | 1.171764  |
| C | -1.988713 | 1.004774  | -0.007331 | C | 1.935854  | 1.039343  | -0.393696 |
| C | -1.793490 | -2.072907 | -0.155318 | C | 1.220390  | -1.614891 | 1.104129  |
| C | -3.153771 | 0.419143  | -0.766053 | C | 3.149653  | 0.143305  | -0.166463 |
| C | -3.030731 | -1.705505 | 0.669441  | C | 1.695079  | -1.973204 | -0.303402 |
| H | -1.416246 | -3.039349 | 0.179412  | H | 0.586764  | -2.407741 | 1.507896  |
| H | -2.069189 | -2.216886 | -1.205991 | H | 2.063720  | -1.542882 | 1.796008  |
| C | -3.924331 | -0.651978 | 0.016736  | C | 2.995158  | -1.276796 | -0.717750 |
| H | -2.770246 | -0.014079 | -1.691573 | H | 3.364224  | 0.097987  | 0.903313  |
| H | -3.818735 | 1.240321  | -1.025628 | H | 3.995855  | 0.629836  | -0.647472 |
| H | -3.619176 | -2.604485 | 0.855528  | H | 1.825687  | -3.053536 | -0.380504 |
| H | -2.692474 | -1.349746 | 1.644862  | H | 0.901458  | -1.707374 | -1.005524 |
| H | -4.612946 | -1.133358 | -0.679732 | H | 3.847869  | -1.868214 | -0.375953 |
| H | -4.535066 | -0.169454 | 0.780271  | H | 3.052214  | -1.250520 | -1.806838 |
| O | -2.064558 | 2.108638  | 0.498456  | O | 2.011868  | 1.930304  | -1.242998 |
| H | 0.323513  | -1.548474 | -0.022771 | H | -0.033376 | -0.179799 | 2.137984  |

### Prod 7 members

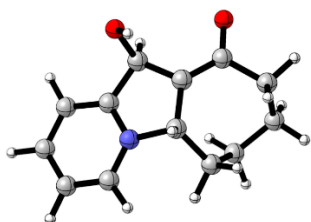

**Gibbs free energy** = -709.355765 hartrees

**LHVF** = 28.7933 cm<sup>-1</sup>

|   |           |           |           |
|---|-----------|-----------|-----------|
| C | -1.461956 | 0.658739  | -0.199038 |
| C | -2.716587 | 0.884599  | -0.742172 |
| C | -3.656978 | -0.122299 | -0.698370 |
| C | -3.346299 | -1.333639 | -0.084146 |
| C | -2.097484 | -1.500634 | 0.458624  |
| N | -1.189918 | -0.523290 | 0.368775  |

|   |           |           |           |
|---|-----------|-----------|-----------|
| H | -4.637724 | 0.028691  | -1.127405 |
| H | -2.928785 | 1.849416  | -1.176088 |
| H | -4.064971 | -2.136009 | -0.024722 |
| H | -1.793361 | -2.403061 | 0.964977  |
| C | -0.298492 | 1.592038  | -0.089086 |
| H | -0.053645 | 2.055732  | -1.049700 |
| O | -0.742928 | 2.638584  | 0.807703  |
| H | 0.052606  | 3.130330  | 1.024074  |
| C | 0.780163  | 0.694510  | 0.359608  |
| C | 0.219738  | -0.554723 | 0.949146  |
| C | 2.097429  | 0.970313  | -0.029963 |
| C | 0.929697  | -1.881798 | 0.647121  |
| C | 3.167880  | -0.088754 | 0.208905  |
| C | 1.607865  | -1.924997 | -0.719323 |
| H | 0.223780  | -2.707946 | 0.754696  |
| H | 1.665222  | -2.039330 | 1.436623  |
| C | 3.015905  | -1.311369 | -0.703882 |
| H | 3.149334  | -0.402492 | 1.255930  |
| H | 4.133756  | 0.380833  | 0.033678  |
| H | 1.671440  | -2.957943 | -1.064834 |
| H | 0.983185  | -1.392493 | -1.439253 |
| H | 3.731847  | -2.072441 | -0.382760 |
| H | 3.292245  | -1.034658 | -1.722336 |
| O | 2.422898  | 2.034847  | -0.587521 |
| H | 0.019462  | -0.514962 | 2.029695  |

---

**Table S3:** Calculated relative energies (in kcal mol<sup>-1</sup>) between two conformers of **6mem** transition state obtained from several DFT functionals and the DLPNO-CCSD(T) theoretical method. The DLPNO-CCSD(T)/CBS energy was used as the benchmark to obtain the mean absolute deviations (MAD).

|                                | $\Delta G$ | MAD  |
|--------------------------------|------------|------|
| <b>B3LYP aug-cc-pVTZ</b>       | 1.05       | 0.37 |
| <b>B3LYP-D3/aug-cc-pVTZ</b>    | 1.46       | 0.17 |
| <b>PBE1PBE/aug-cc-pVTZ</b>     | 1.27       | 0.27 |
| <b>PBE1PBE-D3/aug-cc-pVTZ</b>  | 1.53       | 0.14 |
| <b>M06L/aug-cc-pVTZ</b>        | 1.54       | 0.13 |
| <b>wB97xD/aug-cc-pVTZ</b>      | 1.68       | 0.06 |
| <b>X3LYP/aug-cc-pVTZ</b>       | 1.11       | 0.35 |
| <b>O3LYP/aug-cc-pVTZ</b>       | 0.94       | 0.43 |
| <b>CAM-B3LYP/aug-cc-pVTZ</b>   | 1.29       | 0.26 |
| <b>M11/aug-cc-pVTZ</b>         | 1.59       | 0.11 |
| <b>M052X/aug-cc-pVTZ</b>       | 1.52       | 0.14 |
| <b>HF/aug-cc-pVTZ</b>          | 1.34       | 0.23 |
| <b>DLPNO-CCSD(T)/def2-TZVP</b> | 1.80       | 0.00 |

**Table S4:** Calculated relative energies (in kcal mol<sup>-1</sup>) for 21 conformers (conformer 11 is the lowest in energy) of **7mem** transition state obtained from several DFT functionals and the DLPNO-CCSD(T) theoretical method. The DLPNO-CCSD(T)/CBS energy was used as the benchmark to obtain the mean absolute deviations (MAD).

|                                | Conf 1 | Conf 2 | Conf 3 | Conf 4 | Conf 5 | Conf 6 | Conf 7 | Conf 8 | Conf 9 | Conf 10 | Conf 11 | Conf 12 | Conf 13 | Conf 14 | Conf 15 | Conf 16 | Conf 17 | Conf 18 | Conf 19 | Conf 21 | MAD         |
|--------------------------------|--------|--------|--------|--------|--------|--------|--------|--------|--------|---------|---------|---------|---------|---------|---------|---------|---------|---------|---------|---------|-------------|
| <b>B3LYP aug-cc-pVTZ</b>       | 3.55   | 3.04   | 3.83   | 4.73   | 5.52   | 3.46   | 3.55   | 5.40   | 4.73   | 5.52    | 0.00    | 18.73   | 18.73   | 22.24   | 18.54   | 0.04    | 3.04    | 0.00    | 3.34    | 2.14    | <b>1.16</b> |
| <b>B3LYP-D3/aug-cc-pVTZ</b>    | 3.68   | 3.23   | 4.78   | 5.79   | 6.83   | 3.58   | 3.68   | 6.46   | 5.79   | 6.83    | 0.00    | 18.55   | 18.50   | 22.66   | 19.43   | 0.92    | 3.23    | 0.00    | 4.33    | 3.43    | <b>1.06</b> |
| <b>PBE1PBE/aug-cc-pVTZ</b>     | 4.47   | 3.98   | 5.06   | 5.66   | 7.21   | 4.40   | 4.47   | 6.35   | 5.66   | 7.21    | 0.00    | 21.81   | 21.74   | 25.38   | 21.22   | 0.36    | 3.98    | 0.00    | 4.59    | 2.83    | <b>1.90</b> |
| <b>PBE1PBE-D3/aug-cc-pVTZ</b>  | 4.55   | 4.09   | 5.67   | 6.30   | 8.02   | 4.48   | 4.55   | 6.99   | 6.30   | 8.02    | 0.00    | 21.78   | 21.62   | 25.69   | 21.86   | 0.92    | 4.09    | 0.00    | 5.22    | 3.63    | <b>2.13</b> |
| <b>M06L/aug-cc-pVTZ</b>        | 4.16   | 3.81   | 5.30   | 6.52   | 8.14   | 4.25   | 4.16   | 7.23   | 6.52   | 8.14    | 0.00    | 18.37   | 18.92   | 22.28   | 19.63   | 0.94    | 3.81    | 0.00    | 4.96    | 4.18    | <b>1.45</b> |
| <b>wB97xD/aug-cc-pVTZ</b>      | 3.87   | 3.32   | 5.14   | 5.80   | 7.43   | 3.82   | 3.87   | 6.59   | 5.80   | 7.43    | 0.00    | 19.14   | 18.65   | 23.48   | 19.67   | 1.09    | 3.32    | 0.00    | 4.62    | 3.89    | <b>1.25</b> |
| <b>X3LYP/aug-cc-pVTZ</b>       | 3.69   | 3.17   | 4.05   | 4.86   | 5.76   | 3.62   | 3.69   | 5.58   | 4.86   | 5.76    | 0.00    | 18.93   | 18.95   | 22.53   | 18.75   | 0.13    | 3.17    | 0.00    | 3.55    | 2.26    | <b>1.16</b> |
| <b>O3LYP/aug-cc-pVTZ</b>       | 2.82   | 2.42   | 2.68   | 3.62   | 4.28   | 2.58   | 2.82   | 4.03   | 3.62   | 4.28    | 0.00    | 19.51   | 19.28   | 22.44   | 18.79   | -0.42   | 2.42    | 0.00    | 2.31    | 1.43    | <b>1.57</b> |
| <b>CAM-B3LYP/aug-cc-pVTZ</b>   | 4.11   | 3.47   | 4.74   | 5.21   | 6.59   | 4.14   | 4.11   | 6.16   | 5.21   | 6.59    | 0.00    | 19.18   | 23.40   | 18.96   | 0.41    | 3.47    | 0.00    | 4.13    | 1.17    | 4.14    | <b>2.44</b> |
| <b>M11/aug-cc-pVTZ</b>         | 4.44   | 3.81   | 5.80   | 7.10   | 9.20   | 4.51   | 4.44   | 8.15   | 7.10   | 9.20    | 0.00    | 17.22   | 17.20   | 22.15   | 18.01   | 1.21    | 3.81    | 0.00    | 5.20    | 5.27    | <b>1.56</b> |
| <b>M052X/aug-cc-pVTZ</b>       | 4.15   | 3.47   | 5.30   | 6.29   | 8.10   | 4.17   | 4.16   | 7.34   | 6.29   | 8.10    | 0.00    | 19.65   | 19.55   | 24.08   | 20.36   | 0.95    | 3.47    | 0.00    | 4.66    | 4.36    | <b>1.60</b> |
| <b>HF/aug-cc-pVTZ</b>          | 1.43   | 0.55   | 1.87   | 2.23   | 3.34   | 1.61   | 1.43   | 3.74   | 2.23   | 3.34    | 0.00    | 12.55   | 12.28   | 17.67   | 13.56   | 0.13    | 0.55    | 0.00    | 1.03    | 2.65    | <b>2.03</b> |
| <b>DLPNO-CCSD(T)/def2-TZVP</b> | 2.79   | 2.40   | 4.04   | 5.15   | 6.92   | 2.87   | 2.79   | 5.97   | 5.15   | 6.92    | 0.00    | 14.79   | 14.65   | 20.00   | 16.93   | 1.06    | 2.40    | 0.00    | 3.63    | 4.27    | <b>0.00</b> |
